# Supplementary material for: Deep learning-enabled accurate assessment of gait impairments in Parkinson’s disease using smartphone videos
Source: Springer Nature journal article supplement (doi:10.1038/s41746-025-02150-8), 2025-12-13
Supplement: MOESM3 [file 41746_2025_2150_MOESM3_ESM.xlsx]

## Sheet: Fig2A,B
Subject	Video segments	Prob 0	Prob 1	Prob 2	UPDRS score
36	0	2.53104	1.51687	-3.00578	0
36	1	1.95796	1.74402	-2.7252	0
36	2	-1.42127	5.33033	-3.35291	0
36	3	-0.716654	4.84156	-3.46353	0
36	4	2.0208	1.36368	-2.3258	0
36	5	1.88926	1.62529	-2.49578	0
HY19	0	3.04663	-0.653227	-1.42266	0
HY19	1	3.61119	-0.759649	-1.86827	0
HY19	2	3.38138	-0.772947	-1.60798	0
HY19	3	3.45306	-0.83544	-1.64485	0
HY19	4	4.17074	-0.471024	-2.7743	0
HY19	5	3.53451	-0.302109	-2.29182	0
HY21	0	1.86322	0.139131	-0.917472	0
HY21	1	1.37997	0.992719	-1.68332	0
HY21	2	2.07558	0.82592	-2.19729	0
HY21	3	3.15347	0.357585	-2.58998	0
HY21	4	3.09891	0.427015	-2.60445	0
HY21	5	2.50427	0.041762	-1.44592	0
HY7	0	2.55683	0.493204	-2.04386	0
HY7	1	3.15655	0.644367	-3.13171	0
HY7	2	3.3695	-0.0686968	-2.48145	0
HY7	3	2.97987	0.142909	-2.33277	0
HY7	4	3.30838	0.257442	-2.78154	0
HY7	5	3.09829	-0.105327	-1.84237	0
HY27	0	2.71004	-0.109622	-1.89082	0
HY27	1	2.63313	-0.0701164	-1.86237	0
HY27	2	2.82972	-0.189257	-1.87624	0
HY27	3	3.40435	-0.490795	-2.08505	0
HY27	4	3.75869	-0.135663	-2.83808	0
HY27	5	3.26096	0.12637	-2.65772	0
HY16	0	4.53437	-0.310431	-3.18021	0
HY16	1	4.08189	0.111611	-3.37078	0
HY16	2	3.99113	0.424367	-3.6422	0
HY16	3	4.6204	0.172994	-3.95554	0
HY16	4	4.35556	0.211228	-3.76305	0
HY16	5	4.17877	0.0405574	-3.25914	0
44	0	2.54409	1.35625	-3.12487	1
44	1	2.10692	1.55133	-2.93623	1
44	2	1.84545	1.36241	-2.47398	1
44	3	1.70771	1.2881	-2.25255	1
44	4	1.76939	1.28717	-2.28199	1
44	5	2.3443	1.16641	-2.69205	1
HY6	0	3.75253	0.366316	-3.25217	0
HY6	1	2.78746	1.03187	-3.2086	0
HY6	2	0.512451	2.26972	-2.42122	0
HY6	3	0.792934	2.23592	-2.71654	0
HY6	4	2.04145	1.2854	-2.87487	0
HY6	5	2.72604	0.653639	-2.62313	0
91	0	-2.96281	-0.411911	5.01701	1
91	1	-2.84837	-0.161519	4.57125	1
91	2	-2.81552	-0.284521	4.65233	1
91	3	-3.52017	-0.68574	6.04236	1
91	4	-3.38674	-0.408078	5.56272	1
91	5	-2.79653	-0.257252	4.61845	1
9	0	2.17325	0.245071	-1.37702	1
9	1	1.11884	0.739297	-0.921677	1
9	2	1.01285	1.01735	-1.07864	1
9	3	1.7963	0.996232	-1.86745	1
9	4	1.08978	1.22305	-1.50867	1
9	5	1.36074	0.749945	-1.17521	1
23	0	-6.61802	7.2754	0.178291	1
23	1	-6.07019	7.15651	-0.21849	1
23	2	-3.18319	2.64999	1.9307	1
23	3	-3.58925	3.29926	1.51284	1
23	4	-2.86908	3.42918	0.698473	1
23	5	-3.01084	2.8988	1.51311	1
47	0	-1.75539	1.44941	1.56678	1
47	1	-1.86711	1.38928	1.53624	1
47	2	-1.20438	1.63045	0.299577	1
47	3	-1.54275	1.88283	0.42462	1
47	4	-2.82137	1.69145	2.16046	1
47	5	-2.37128	1.4992	2.06595	1
62	0	1.55951	-0.942592	0.44935	1
62	1	0.288806	-0.0604817	0.525004	1
62	2	0.137474	0.214406	0.364608	1
62	3	0.371992	0.164664	0.155784	1
62	4	0.338645	0.342593	-0.0286014	1
62	5	1.37483	-0.489776	0.104568	1
61	0	0.139655	1.2816	-0.417643	1
61	1	0.0860014	1.62207	-0.762352	1
61	2	-0.546813	1.74933	-0.277373	1
61	3	-0.899108	1.78227	0.019872	1
61	4	-1.18974	1.29149	0.897783	1
61	5	-0.783792	0.91808	0.945247	1
78	0	0.951092	-0.566017	0.727285	1
78	1	1.09416	0.00956883	-0.431641	1
78	2	0.661143	0.309246	-0.311059	1
78	3	-0.00619565	0.260499	0.601852	1
78	4	1.14531	-0.525612	0.27213	1
78	5	1.66958	-1.05245	0.518145	1
2	0	1.79669	0.0882679	-0.72434	1
2	1	2.17893	1.13567	-2.5991	1
2	2	1.60482	1.1837	-2.09567	1
2	3	0.736169	1.57651	-1.64438	1
2	4	0.636168	1.60159	-1.5161	1
2	5	1.12259	0.161377	-0.092624	1
55	0	0.134403	0.764166	0.029115	1
55	1	0.313667	0.666584	-0.125619	1
55	2	0.851418	1.07556	-1.17301	1
55	3	1.37822	0.951114	-1.52883	1
55	4	1.04647	0.627452	-0.833196	1
55	5	0.340404	0.849484	-0.322641	1
70	0	-2.85384	-1.35332	6.07428	2
70	1	-1.09099	0.298792	1.93379	2
70	2	-1.20264	0.281808	2.088	2
70	3	-2.80393	-0.793552	5.26123	2
70	4	-2.76386	-0.987307	5.50569	2
70	5	-2.92541	-1.56406	6.47294	2
28	0	-0.335891	1.22092	0.253092	2
28	1	-1.16158	1.86278	0.337329	2
28	2	-0.790566	1.87894	-0.0549301	2
28	3	-1.28042	2.07513	0.224883	2
28	4	-1.15181	1.73426	0.47291	2
28	5	0.16373	0.896205	0.10886	2
20	0	-0.828824	-0.79764	2.94812	2
20	1	-0.76358	-0.533316	2.70803	2
20	2	-0.646771	-0.0558023	1.939	2
20	3	0.280388	0.0252987	0.694712	2
20	4	-0.299681	0.128394	1.22989	2
20	5	-1.29208	-0.217032	2.71426	2
59	0	-3.71622	0.0670206	5.25739	2
59	1	-2.07646	0.31288	2.98366	2
59	2	-2.2939	0.747808	2.67837	2
59	3	-3.2111	0.401379	4.20816	2
59	4	-3.48723	0.790131	4.0212	2
59	5	-4.20979	0.890701	4.76514	2
33	0	-1.85846	-1.06719	4.53151	2
33	1	-1.93411	-0.282112	3.6678	2
33	2	-2.71883	-0.410438	4.73576	2
33	3	-2.82486	-1.07904	5.69891	2
33	4	-2.83782	-1.20746	5.87575	2
33	5	-2.65615	-1.32394	5.77631	2
31	0	0.552093	-0.955402	1.41543	2
31	1	0.0957887	-1.07229	2.15879	2
31	2	0.0388914	-1.59073	2.96574	2
31	3	0.0851814	-1.53559	2.83626	2
31	4	0.0975874	-1.54719	2.8418	2
31	5	0.507602	-1.48545	2.22791	2
58	0	-0.929136	-1.98979	4.63538	2
58	1	-1.08281	-1.13815	3.60409	2
58	2	-1.40789	-0.946579	3.76356	2
58	3	-1.13385	-1.01987	3.52979	2
58	4	-0.725683	-1.27222	3.33454	2
58	5	-0.846043	-2.05057	4.5996	2
102	0	-5.10498	0.481083	6.62612	2
102	1	-6.46029	1.53475	7.03746	2
102	2	-6.3081	1.66006	6.68163	2
102	3	-5.44771	1.49408	5.84864	2
102	4	-5.43262	1.45119	5.90937	2
102	5	-4.9377	0.563505	6.33102	2
36	0	0.95265	1.43804	-2.86139	0
36	1	0.555874	1.67832	-2.73546	0
36	2	-0.533441	2.3443	-2.57294	0
36	3	0.225256	1.75499	-2.6271	0
36	4	0.762456	1.28708	-2.57266	0
36	5	0.400534	1.63612	-2.64442	0
HY19	0	2.48176	0.194874	-2.95935	0
HY19	1	3.39783	-0.484813	-3.10056	0
HY19	2	3.0557	-0.313671	-2.9936	0
HY19	3	3.14292	-0.319701	-3.04775	0
HY19	4	3.8569	-0.554019	-3.37496	0
HY19	5	2.85361	0.131698	-3.17959	0
HY21	0	0.994601	-0.0641955	-1.40202	0
HY21	1	-0.427814	0.911356	-1.16414	0
HY21	2	0.847109	0.866155	-2.25696	0
HY21	3	2.57831	-0.0636192	-2.83095	0
HY21	4	2.69958	-0.0415812	-2.971	0
HY21	5	2.39079	-0.0873596	-2.6349	0
HY7	0	3.88003	-0.994358	-3.05127	0
HY7	1	4.5582	-0.919251	-3.65236	0
HY7	2	3.96968	-0.702056	-3.41772	0
HY7	3	3.6936	-0.436218	-3.44106	0
HY7	4	4.21369	-0.724116	-3.56482	0
HY7	5	3.8116	-1.06506	-2.94039	0
HY27	0	1.36024	1.40172	-3.25739	0
HY27	1	1.34757	1.18538	-2.93057	0
HY27	2	2.01352	0.285562	-2.61497	0
HY27	3	2.99502	-0.345316	-2.86797	0
HY27	4	4.26346	-0.503819	-3.7993	0
HY27	5	3.29463	0.343393	-3.87311	0
HY16	0	6.42624	-0.638619	-5.69073	0
HY16	1	5.25406	0.226011	-5.54296	0
HY16	2	5.51384	0.51099	-6.08342	0
HY16	3	7.02666	-0.716132	-6.17787	0
HY16	4	6.77688	-0.744467	-5.89797	0
HY16	5	6.43624	-0.381975	-5.95129	0
44	0	3.97986	0.802636	-5.26423	1
44	1	3.61947	1.01286	-5.1369	1
44	2	2.53364	1.22115	-4.30688	1
44	3	1.8537	1.3353	-3.71576	1
44	4	1.60696	1.17301	-3.34324	1
44	5	2.64729	0.848629	-4.06167	1
HY6	0	5.11849	-0.386246	-4.69595	0
HY6	1	5.26091	-0.313703	-4.88751	0
HY6	2	2.75107	0.311394	-3.24773	0
HY6	3	2.20122	0.424481	-2.89435	0
HY6	4	2.89822	0.316697	-3.40369	0
HY6	5	3.30564	0.131066	-3.56551	0
91	0	-3.38555	-2.71479	4.61252	1
91	1	-3.07566	-2.76999	4.44283	1
91	2	-3.39244	-2.9471	4.87523	1
91	3	-4.84337	-2.32962	5.3281	1
91	4	-4.72116	-2.15737	5.1131	1
91	5	-3.58013	-2.71964	4.82992	1
9	0	1.91029	0.510395	-2.85131	1
9	1	1.52292	0.549546	-2.50843	1
9	2	1.12144	1.31442	-2.98314	1
9	3	1.64602	0.947607	-3.09139	1
9	4	0.921486	0.524594	-2.0057	1
9	5	0.78428	0.852258	-2.24033	1
23	0	-4.68579	3.45676	-0.14765	1
23	1	-4.68977	2.81041	0.579883	1
23	2	-4.07645	1.83411	1.13485	1
23	3	-4.36942	2.1938	1.00391	1
23	4	-3.86871	2.27788	0.448397	1
23	5	-3.57177	2.56455	-0.148196	1
47	0	-4.56977	1.0948	2.0326	1
47	1	-4.82779	1.27307	2.15942	1
47	2	-3.20215	1.61602	0.483289	1
47	3	-3.07895	1.31844	0.720099	1
47	4	-5.00154	1.31117	2.25773	1
47	5	-4.86672	1.43049	1.8941	1
62	0	0.0682331	0.0936357	-0.784699	1
62	1	-2.00572	1.4871	-0.421165	1
62	2	-1.65232	2.14614	-1.38021	1
62	3	-1.59323	2.20322	-1.47006	1
62	4	-1.43444	2.14114	-1.51114	1
62	5	0.580423	0.690591	-1.78482	1
61	0	1.44407	1.51639	-3.64652	1
61	1	0.877962	2.26911	-3.96288	1
61	2	0.630249	2.2918	-3.79548	1
61	3	0.257394	2.32342	-3.4807	1
61	4	-0.643287	2.35198	-2.60758	1
61	5	0.295675	1.56764	-2.606	1
78	0	0.737497	-0.533909	-0.689092	1
78	1	-0.288464	0.860959	-1.28439	1
78	2	-0.553754	1.68875	-1.89248	1
78	3	-0.653931	1.27798	-1.30641	1
78	4	-0.108236	-0.012704	-0.551175	1
78	5	1.0179	-0.996798	-0.541936	1
2	0	1.92808	0.522278	-3.05291	1
2	1	2.16739	0.86984	-3.54726	1
2	2	1.62403	0.62291	-2.69798	1
2	3	0.449246	1.30424	-2.37813	1
2	4	-0.649899	1.8351	-1.9495	1
2	5	0.285573	0.80621	-1.775	1
55	0	-1.06332	0.894781	-0.441314	1
55	1	-1.30041	0.725419	-0.0805698	1
55	2	-1.7088	1.20837	-0.246961	1
55	3	-1.20125	0.720438	-0.223224	1
55	4	-1.61034	0.115676	0.728263	1
55	5	-1.8808	0.772971	0.343782	1
70	0	-3.66792	-2.35587	4.5046	2
70	1	1.06073	-2.11682	0.055362	2
70	2	1.07419	-2.15234	0.0695732	2
70	3	-3.3054	-2.91619	4.73167	2
70	4	-3.64896	-3.09384	5.18905	2
70	5	-3.998	-2.56903	4.9762	2
28	0	-2.76519	0.283997	1.50649	2
28	1	-3.03286	0.770926	1.2157	2
28	2	-2.67199	1.20523	0.520662	2
28	3	-3.25455	1.64659	0.617449	2
28	4	-3.2609	1.63373	0.636887	2
28	5	-2.41067	0.705435	0.83089	2
20	0	-2.86899	-0.73304	2.38439	2
20	1	-2.61618	-0.65622	2.11107	2
20	2	-2.44427	-1.11698	2.3856	2
20	3	-2.60912	-0.760475	2.18531	2
20	4	-3.4257	-0.463557	2.57679	2
20	5	-3.51365	-0.896881	3.0504	2
59	0	-5.46911	0.0834936	3.65935	2
59	1	-5.79422	0.739626	3.30155	2
59	2	-5.82088	0.889123	3.19857	2
59	3	-5.92042	0.469804	3.68114	2
59	4	-6.161	0.503653	3.85901	2
59	5	-5.73635	0.26684	3.73425	2
33	0	-3.20134	-2.49522	4.38283	2
33	1	-3.28904	-1.16302	3.04659	2
33	2	-3.63733	-1.36499	3.50143	2
33	3	-4.4759	-1.43894	4.29753	2
33	4	-4.57329	-1.5089	4.42742	2
33	5	-3.64702	-2.76715	4.96756	2
31	0	-0.954957	1.44848	-1.44285	2
31	1	-0.557345	1.31465	-1.65001	2
31	2	-0.646061	0.876002	-1.02672	2
31	3	-0.386859	0.703882	-1.07579	2
31	4	-0.205447	0.567921	-1.0989	2
31	5	-0.862261	0.873868	-0.84267	2
58	0	-1.54234	-2.34978	2.97391	2
58	1	-2.03032	-1.40364	2.44065	2
58	2	-2.02587	-1.19224	2.24065	2
58	3	-1.73032	-1.64855	2.42368	2
58	4	-1.80819	-1.84358	2.67311	2
58	5	-1.61576	-2.33341	3.02334	2
102	0	-5.93536	0.404174	3.46496	2
102	1	-7.36746	1.35659	3.90153	2
102	2	-7.53802	1.70716	3.68338	2
102	3	-7.18019	1.83328	3.22218	2
102	4	-7.02527	1.40541	3.54482	2
102	5	-5.951	0.326864	3.56945	2
36	0	0.853118	0.807764	-2.36048	0
36	1	0.0172899	1.31321	-1.95836	0
36	2	-1.20568	3.62354	-3.14261	0
36	3	-0.34451	2.65768	-3.12542	0
36	4	0.357679	0.976208	-2.03891	0
36	5	0.332337	1.43661	-2.45822	0
HY19	0	2.41278	-0.464792	-2.66814	0
HY19	1	3.83393	-1.66812	-3.04143	0
HY19	2	3.3715	-1.28076	-2.87456	0
HY19	3	3.34054	-1.4707	-2.68946	0
HY19	4	4.38726	-1.81498	-3.49819	0
HY19	5	2.99706	-0.421708	-3.31	0
HY21	0	2.44064	-1.23821	-1.9732	0
HY21	1	0.619172	0.9515	-2.11822	0
HY21	2	1.62306	0.668352	-2.95501	0
HY21	3	3.57927	-0.656816	-3.80699	0
HY21	4	3.64871	-0.837151	-3.69575	0
HY21	5	3.51396	-1.70169	-2.69875	0
HY7	0	3.67222	-1.77309	-2.79533	0
HY7	1	4.59896	-1.83151	-3.74106	0
HY7	2	3.6127	-0.53879	-3.95924	0
HY7	3	3.37547	-0.680127	-3.59952	0
HY7	4	3.8606	-1.63571	-3.18626	0
HY7	5	3.17109	-1.43595	-2.60025	0
HY27	0	1.37574	0.286262	-2.25438	0
HY27	1	1.0649	-0.3694	-1.32324	0
HY27	2	1.18352	-0.710365	-1.15434	0
HY27	3	2.51599	-1.62234	-1.75385	0
HY27	4	3.73874	-2.11871	-2.61499	0
HY27	5	2.71712	-0.551069	-2.94662	0
HY16	0	4.86221	-2.11541	-3.93089	0
HY16	1	3.01115	-0.255826	-3.60126	0
HY16	2	2.99597	0.0222075	-3.79979	0
HY16	3	5.40146	-2.49297	-4.07645	0
HY16	4	5.36308	-2.55115	-3.96523	0
HY16	5	4.80865	-1.89555	-4.0182	0
44	0	0.98922	0.67397	-2.52214	1
44	1	0.502289	0.976685	-2.27784	1
44	2	-0.164719	0.820848	-1.43047	1
44	3	-1.36366	1.92735	-1.13068	1
44	4	-1.69785	1.87084	-0.668828	1
44	5	-0.0119833	0.461623	-1.21292	1
HY6	0	3.63678	-1.67477	-2.93705	0
HY6	1	3.60922	-2.17063	-2.41951	0
HY6	2	2.00899	-1.39514	-1.38872	0
HY6	3	2.25312	-1.12805	-1.87161	0
HY6	4	2.97479	-1.34704	-2.47467	0
HY6	5	2.75822	-1.11826	-2.50932	0
91	0	-1.73852	-2.83056	3.49328	1
91	1	-1.13178	-2.39115	2.37594	1
91	2	-1.62465	-1.83147	2.47568	1
91	3	-3.49385	-2.43849	5.01604	1
91	4	-3.40693	-2.10469	4.7105	1
91	5	-2.14447	-1.93708	3.28748	1
9	0	2.21765	-0.810275	-2.15127	1
9	1	1.26034	-0.0955942	-1.92936	1
9	2	1.3667	0.371921	-2.44665	1
9	3	1.73131	0.526266	-2.92063	1
9	4	0.313045	1.45698	-2.24442	1
9	5	0.905739	0.587955	-1.99235	1
23	0	-4.84622	4.23771	-0.183642	1
23	1	-4.79628	3.80995	0.380198	1
23	2	-3.84283	2.32158	1.12614	1
23	3	-4.49533	2.92194	1.16263	1
23	4	-4.16928	2.47014	1.30972	1
23	5	-3.56672	2.29753	0.709395	1
47	0	-2.5921	-0.768722	2.75822	1
47	1	-4.22608	0.848516	2.80417	1
47	2	-3.55053	1.28172	1.80907	1
47	3	-2.83278	0.36126	1.99626	1
47	4	-3.90454	0.990949	2.49809	1
47	5	-2.98831	0.294174	2.26495	1
62	0	-0.217264	-0.13662	-0.167869	1
62	1	-2.66538	2.88995	-0.298111	1
62	2	-2.22659	2.51382	-0.40706	1
62	3	-2.35392	2.89017	-0.657765	1
62	4	-1.99891	2.4451	-0.619158	1
62	5	0.576543	-0.95781	-0.238212	1
61	0	0.888408	1.9955	-3.71902	1
61	1	0.27779	2.34519	-3.55128	1
61	2	-0.544576	2.42903	-2.76239	1
61	3	-0.751076	2.78556	-2.84382	1
61	4	-1.21084	2.82365	-2.35835	1
61	5	-0.39372	2.11744	-2.44465	1
78	0	1.26851	-1.78066	-0.238577	1
78	1	-0.316574	0.927134	-0.967609	1
78	2	-1.05709	1.99329	-1.15134	1
78	3	-1.32727	1.57782	-0.455546	1
78	4	-1.38533	0.581324	0.548644	1
78	5	0.469929	-1.711	0.581882	1
2	0	1.50755	-1.15565	-1.11612	1
2	1	1.79309	0.0298159	-2.58886	1
2	2	1.01284	0.0587203	-1.78374	1
2	3	-0.945885	1.54281	-1.14254	1
2	4	-1.39576	1.72799	-0.856992	1
2	5	0.277425	-0.941561	-0.025443	1
55	0	-1.54691	2.1768	-0.915836	1
55	1	-1.40294	1.70208	-0.593062	1
55	2	-0.688763	1.23693	-0.920438	1
55	3	0.347238	0.525535	-1.34994	1
55	4	-0.289967	-0.176728	-0.066521	1
55	5	-1.46994	1.00939	0.0402033	1
70	0	-2.09153	-3.27109	4.31735	2
70	1	0.327095	-2.30689	0.619576	2
70	2	0.50586	-2.59595	0.661234	2
70	3	-1.66838	-3.59826	4.07493	2
70	4	-2.73459	-1.94967	3.91939	2
70	5	-2.97897	-1.91156	4.20346	2
28	0	-3.11729	0.928378	1.71036	2
28	1	-3.33891	1.78672	1.09708	2
28	2	-2.83494	2.38735	0.047453	2
28	3	-4.26445	3.17501	0.826626	2
28	4	-4.18503	2.40447	1.52973	2
28	5	-2.5339	0.758463	1.36384	2
20	0	-1.77218	-1.80628	2.84498	2
20	1	-1.58713	-1.87348	2.58297	2
20	2	-0.855226	-2.8298	2.64065	2
20	3	0.358289	-2.65299	1.41702	2
20	4	-0.871054	-2.15359	2.33417	2
20	5	-2.26961	-2.26321	3.81981	2
59	0	-5.33769	0.148355	4.68341	2
59	1	-5.47059	1.06123	4.28418	2
59	2	-5.02872	0.623943	4.24511	2
59	3	-5.53609	0.365464	4.93983	2
59	4	-5.87986	0.831467	4.83108	2
59	5	-5.23958	0.177068	4.53559	2
33	0	-2.62684	-1.29213	3.35302	2
33	1	-3.04899	-1.52523	3.95496	2
33	2	-3.6313	-2.03952	4.99388	2
33	3	-4.91163	-1.19525	5.65461	2
33	4	-4.68158	-1.07174	5.32418	2
33	5	-2.9791	-1.68292	4.06151	2
31	0	-2.26596	0.317754	1.723	2
31	1	-2.18576	0.446907	1.48639	2
31	2	-2.59393	0.496123	1.87919	2
31	3	-2.14369	0.243115	1.64401	2
31	4	-1.9105	-0.0513802	1.65346	2
31	5	-2.44093	0.0724755	2.12525	2
58	0	-1.3119	-2.95073	3.28306	2
58	1	-2.38973	-1.37841	3.15702	2
58	2	-2.5018	-1.88397	3.64513	2
58	3	-1.86388	-2.26602	3.30653	2
58	4	-1.82716	-2.08569	3.22691	2
58	5	-1.38724	-3.27597	3.69156	2
102	0	-4.70707	-0.242008	4.34897	2
102	1	-5.041	0.379373	4.14928	2
102	2	-4.93811	0.301258	4.14843	2
102	3	-4.40466	-0.175661	3.98966	2
102	4	-4.27968	-0.418937	4.14398	2
102	5	-4.47921	-0.5634	4.50244	2
36	0	-0.0599854	0.918268	-1.7352	0
36	1	-0.487202	1.20192	-1.6175	0
36	2	-1.20199	0.976929	-0.686887	0
36	3	-0.784039	0.536018	-0.638229	0
36	4	-0.479233	0.754384	-1.18507	0
36	5	-0.469968	0.911638	-1.35142	0
HY19	0	2.13399	-0.134821	-2.783	0
HY19	1	2.67248	-0.655857	-2.75457	0
HY19	2	2.40466	-0.525824	-2.58985	0
HY19	3	2.7517	-0.795447	-2.67775	0
HY19	4	3.28949	-1.54505	-2.50332	0
HY19	5	2.40396	-0.754393	-2.44385	0
HY21	0	1.04071	-1.22674	-0.593007	0
HY21	1	0.695633	0.102648	-1.68035	0
HY21	2	1.12045	0.186157	-2.18042	0
HY21	3	1.90751	-0.610851	-2.18808	0
HY21	4	1.89139	-0.601378	-2.18189	0
HY21	5	1.4494	-1.13375	-1.08689	0
HY7	0	0.761287	-1.20447	-0.254058	0
HY7	1	1.63288	-0.445681	-2.02659	0
HY7	2	1.68275	0.436659	-2.95401	0
HY7	3	1.44041	0.669497	-2.95043	0
HY7	4	2.11516	-0.212602	-2.7139	0
HY7	5	1.4859	-1.20423	-0.944942	0
HY27	0	-0.222431	0.958839	-1.64132	0
HY27	1	0.205042	0.949433	-2.09884	0
HY27	2	0.970825	0.458993	-2.26192	0
HY27	3	1.34652	-0.0695916	-2.04023	0
HY27	4	2.16416	-0.688724	-2.27709	0
HY27	5	1.36099	-0.150734	-2.04126	0
HY16	0	2.80322	-1.54502	-2.08447	0
HY16	1	2.99672	-0.418391	-3.55165	0
HY16	2	2.80957	-0.305168	-3.43594	0
HY16	3	3.53079	-1.21997	-3.18176	0
HY16	4	3.08969	-0.916126	-3.01943	0
HY16	5	2.17496	-1.12796	-1.80643	0
44	0	0.857561	0.268949	-2.22337	1
44	1	0.476542	0.701792	-2.31144	1
44	2	-0.0867546	1.09838	-2.122	1
44	3	0.111824	1.11169	-2.32209	1
44	4	0.0614659	0.767933	-1.95668	1
44	5	0.243906	0.321784	-1.66852	1
HY6	0	0.862236	-0.451117	-1.12301	0
HY6	1	0.9302	0.284786	-2.04614	0
HY6	2	-1.18538	0.564603	-0.246686	0
HY6	3	-0.755136	0.190231	-0.248796	0
HY6	4	0.0218773	0.599774	-1.44208	0
HY6	5	-0.476327	0.238243	-0.516842	0
91	0	-2.56308	-3.76934	5.46726	1
91	1	-2.43862	-3.64268	5.22117	1
91	2	-2.65454	-3.83359	5.5752	1
91	3	-3.0898	-4.01152	6.17247	1
91	4	-2.82063	-4.03572	5.97464	1
91	5	-2.50984	-3.98443	5.62345	1
9	0	0.694651	0.147577	-1.59734	1
9	1	-0.538184	0.266984	-0.597587	1
9	2	-0.364075	0.276963	-0.826802	1
9	3	0.227623	0.150133	-1.27889	1
9	4	-1.19442	0.942848	-0.689133	1
9	5	-0.553282	0.95027	-1.23679	1
23	0	-5.14986	1.04525	3.05868	1
23	1	-4.60009	0.764351	2.83977	1
23	2	-4.26977	0.903949	2.42048	1
23	3	-4.76595	1.21212	2.53897	1
23	4	-4.30958	1.28838	2.03026	1
23	5	-4.36316	1.26111	2.13068	1
47	0	-3.18656	0.736008	1.42863	1
47	1	-4.49059	0.716521	2.7068	1
47	2	-3.88637	0.739226	2.15815	1
47	3	-3.85978	0.689954	2.18386	1
47	4	-5.13975	1.23236	2.76283	1
47	5	-3.86231	1.30112	1.45896	1
62	0	-1.09197	0.138933	0.107904	1
62	1	-1.63293	0.951481	-0.221653	1
62	2	-1.61697	0.607722	0.127181	1
62	3	-1.40939	0.579545	-0.0508909	1
62	4	-1.43909	1.10939	-0.56496	1
62	5	-1.10571	0.325023	-0.0573315	1
61	0	-0.578389	0.374044	-0.743732	1
61	1	-0.710417	0.82965	-1.05547	1
61	2	-1.40683	1.11303	-0.640724	1
61	3	-1.55056	1.22393	-0.640488	1
61	4	-2.16058	1.41242	-0.112617	1
61	5	-1.88483	0.845914	0.198884	1
78	0	-0.560263	-0.475373	0.368108	1
78	1	-0.191301	-0.0322305	-0.441537	1
78	2	-1.05359	0.591912	-0.322913	1
78	3	-1.74384	0.925922	-0.018479	1
78	4	-0.88956	-0.132953	0.254376	1
78	5	-0.56827	-0.910105	0.759587	1
2	0	0.676134	-0.79657	-0.601442	1
2	1	0.110271	0.209419	-1.25573	1
2	2	-0.291919	0.00264689	-0.624365	1
2	3	-1.20814	0.429763	-0.18738	1
2	4	-1.48894	0.569663	-0.0376901	1
2	5	-0.00685539	-0.863443	0.179611	1
55	0	-0.759749	0.375133	-0.342667	1
55	1	-0.924897	0.158038	0.05594	1
55	2	-1.15726	0.0469379	0.367242	1
55	3	-0.814763	-0.412571	0.527581	1
55	4	-1.15488	-0.536962	0.982796	1
55	5	-1.33223	0.139642	0.42385	1
70	0	-2.38985	-4.30205	5.88243	2
70	1	-0.89049	-4.15644	4.08582	2
70	2	-0.97517	-4.23032	4.22485	2
70	3	-2.49767	-4.42614	6.0977	2
70	4	-2.42753	-4.26376	5.90406	2
70	5	-2.40439	-4.21355	5.82781	2
28	0	-2.63921	0.491581	1.26623	2
28	1	-3.55652	0.848342	1.75662	2
28	2	-2.79616	1.23072	0.663261	2
28	3	-3.15633	1.59965	0.628699	2
28	4	-3.01901	1.72551	0.322865	2
28	5	-1.74154	0.999819	-0.132963	2
20	0	-1.69263	-2.10744	3.09353	2
20	1	-1.49776	-2.14906	2.90839	2
20	2	-1.32494	-2.23513	2.82152	2
20	3	-0.816452	-1.04977	1.17719	2
20	4	-0.985508	-0.945166	1.26027	2
20	5	-1.68886	-2.0889	3.08975	2
59	0	-3.59765	-1.99185	4.62415	2
59	1	-3.48195	-0.812688	3.38357	2
59	2	-3.63268	-0.785172	3.49415	2
59	3	-3.84698	-1.58564	4.50051	2
59	4	-4.29372	-1.3699	4.68118	2
59	5	-4.19512	-1.74859	4.91539	2
33	0	-2.2643	-3.85839	5.32938	2
33	1	-2.8334	-3.16707	5.05683	2
33	2	-2.90833	-3.72877	5.58528	2
33	3	-3.17379	-4.30065	6.519	2
33	4	-3.25238	-4.23301	6.54738	2
33	5	-2.41782	-4.35245	5.88622	2
31	0	-0.752391	-2.17406	2.33696	2
31	1	-0.800535	-2.26545	2.47831	2
31	2	-0.849638	-1.92867	2.26187	2
31	3	-0.801948	-1.85437	2.13044	2
31	4	-0.819813	-1.84881	2.14199	2
31	5	-0.81936	-1.83172	2.13207	2
58	0	-0.30203	-2.95233	2.6577	2
58	1	-0.635267	-2.11112	2.1046	2
58	2	-1.20189	-2.72436	3.21204	2
58	3	-0.812722	-2.97731	3.09151	2
58	4	-0.409424	-2.51216	2.27542	2
58	5	-0.465353	-3.10042	2.94904	2
102	0	-4.36481	-1.95064	5.3833	2
102	1	-6.43841	-0.257229	5.50733	2
102	2	-6.5459	-0.00596445	5.35252	2
102	3	-5.56237	-0.0433252	4.46285	2
102	4	-5.32834	0.159128	4.05021	2
102	5	-4.23828	-1.49693	4.81585	2
36	0	-0.543205	1.91496	-1.30896	0
36	1	-0.888762	1.92389	-1.07291	0
36	2	-1.48231	2.05426	-0.727755	0
36	3	-1.27965	2.10876	-0.935224	0
36	4	-0.979514	2.04844	-1.09218	0
36	5	-0.83661	1.985	-1.12076	0
HY19	0	1.93502	0.522675	-1.83743	0
HY19	1	1.96413	0.533708	-1.8759	0
HY19	2	1.86178	0.536666	-1.79043	0
HY19	3	2.08407	0.615532	-2.07763	0
HY19	4	2.1703	0.645196	-2.17855	0
HY19	5	1.9189	0.555297	-1.85288	0
HY21	0	0.562483	0.596967	-0.794514	0
HY21	1	-0.191976	0.793896	-0.547839	0
HY21	2	0.650837	0.830756	-1.28897	0
HY21	3	1.08818	0.884013	-1.61671	0
HY21	4	1.15077	0.890983	-1.68689	0
HY21	5	1.46789	0.640797	-1.60582	0
HY7	0	2.20404	0.65878	-2.22049	0
HY7	1	1.83492	0.878474	-2.28812	0
HY7	2	1.77533	0.683764	-1.95347	0
HY7	3	1.62262	0.630561	-1.78088	0
HY7	4	1.92852	0.682042	-2.09378	0
HY7	5	2.45035	0.515551	-2.19873	0
HY27	0	1.89143	0.726257	-2.11531	0
HY27	1	1.7729	0.83108	-2.10891	0
HY27	2	1.89362	0.792066	-2.15577	0
HY27	3	2.077	0.852719	-2.35358	0
HY27	4	2.4089	0.957024	-2.74868	0
HY27	5	2.34404	0.791547	-2.55727	0
HY16	0	3.02793	0.72759	-2.87319	0
HY16	1	3.02986	0.804136	-3.03203	0
HY16	2	3.1986	0.862171	-3.24815	0
HY16	3	3.32388	0.948439	-3.43472	0
HY16	4	3.205	0.926043	-3.33738	0
HY16	5	3.07779	0.763229	-2.99198	0
44	0	1.21647	1.94244	-2.87038	1
44	1	0.953456	1.93617	-2.66197	1
44	2	0.52894	1.91874	-2.30936	1
44	3	0.601912	1.82034	-2.2426	1
44	4	0.340258	1.89269	-2.12172	1
44	5	0.530304	1.99736	-2.39689	1
HY6	0	2.40792	0.81731	-2.56573	0
HY6	1	2.15926	0.849244	-2.46027	0
HY6	2	0.602539	0.813976	-1.26046	0
HY6	3	0.576088	0.598229	-1.05656	0
HY6	4	1.30628	0.54613	-1.54143	0
HY6	5	1.58138	0.729942	-1.85078	0
91	0	-2.60828	-0.089593	2.87619	1
91	1	-2.66119	-0.112749	2.95987	1
91	2	-2.68293	-0.205964	3.05602	1
91	3	-2.73899	-0.0816605	2.89129	1
91	4	-2.48848	-0.0807115	2.64447	1
91	5	-2.37951	-0.181859	2.72552	1
9	0	0.948509	0.785502	-1.39795	1
9	1	-0.0573519	1.4188	-1.29652	1
9	2	-0.159178	1.49838	-1.31149	1
9	3	0.165336	1.23858	-1.30291	1
9	4	-0.0654171	1.10609	-0.988236	1
9	5	0.61593	0.732603	-1.09825	1
23	0	-4.75368	3.16891	0.803224	1
23	1	-3.84882	2.38798	0.870663	1
23	2	-3.20859	2.44547	0.261412	1
23	3	-3.67351	2.8334	0.249019	1
23	4	-3.36638	2.78363	0.0393279	1
23	5	-3.80633	3.17663	-0.015719	1
47	0	-3.29955	0.206595	2.6412	1
47	1	-4.24305	1.57683	1.90199	1
47	2	-2.40893	1.48252	0.405134	1
47	3	-2.75016	1.29723	0.847639	1
47	4	-3.86299	1.33642	1.73312	1
47	5	-2.57826	0.151477	2.02983	1
62	0	0.78561	0.0769408	-0.455118	1
62	1	0.525022	0.137794	-0.397264	1
62	2	0.360069	0.176557	-0.324315	1
62	3	0.602085	0.257741	-0.607299	1
62	4	0.958048	0.379053	-1.03137	1
62	5	0.976619	0.237017	-0.806236	1
61	0	0.406562	1.99828	-2.28984	1
61	1	0.111481	2.2299	-2.27973	1
61	2	-0.455816	2.1016	-1.69046	1
61	3	-0.31233	2.03225	-1.74468	1
61	4	-0.400318	1.9925	-1.61511	1
61	5	-0.248723	1.83022	-1.571	1
78	0	0.726974	-0.142939	-0.195717	1
78	1	1.06483	0.0404911	-0.776138	1
78	2	1.15995	0.177427	-0.995765	1
78	3	0.551881	0.0626801	-0.315277	1
78	4	0.357253	-0.457059	0.506526	1
78	5	0.627467	-0.525742	0.406459	1
2	0	1.10738	0.163066	-0.828794	1
2	1	0.0939988	1.36407	-1.4262	1
2	2	-0.326589	1.28102	-1.02009	1
2	3	-0.906093	1.24989	-0.553764	1
2	4	-1.62878	1.20668	0.0829389	1
2	5	-0.0359041	0.036809	0.214014	1
55	0	0.0785183	0.672725	-0.537374	1
55	1	-0.614515	0.820879	-0.169606	1
55	2	-0.72132	0.878762	-0.165829	1
55	3	-0.614273	0.824939	-0.195747	1
55	4	-0.932896	0.77316	0.150601	1
55	5	-0.346909	0.67883	-0.18725	1
70	0	-1.79566	-0.288127	2.39838	2
70	1	-1.18316	0.0436501	1.63066	2
70	2	-1.26682	0.0582098	1.69049	2
70	3	-1.6679	-0.17175	2.27775	2
70	4	-1.19238	-0.471724	2.13748	2
70	5	-1.4038	-0.573541	2.31794	2
28	0	-1.9472	1.53781	0.28159	2
28	1	-2.57005	1.74754	0.545523	2
28	2	-1.98797	1.78464	-0.0208403	2
28	3	-2.04064	1.72252	0.0792915	2
28	4	-1.66984	1.63162	-0.137395	2
28	5	-0.994319	1.48402	-0.501459	2
20	0	-1.31807	-0.40453	2.00784	2
20	1	-1.54484	-0.348749	2.16125	2
20	2	-1.87812	-0.374404	2.42546	2
20	3	-1.34784	-0.457067	1.98207	2
20	4	-1.51717	-0.435103	2.0811	2
20	5	-1.8207	-0.40822	2.37107	2
59	0	-2.99929	0.117292	2.73158	2
59	1	-2.40089	-0.264799	2.40654	2
59	2	-2.83512	-0.226068	2.67891	2
59	3	-3.33989	-0.0494104	3.01029	2
59	4	-3.67837	0.0597982	3.13001	2
59	5	-3.77199	0.265232	3.12368	2
33	0	-1.89849	-0.643849	2.41964	2
33	1	-2.86646	-0.702184	3.11857	2
33	2	-3.4437	-0.511344	3.41723	2
33	3	-3.0931	-0.563044	3.23115	2
33	4	-2.7643	-0.648913	3.11762	2
33	5	-2.14693	-0.538878	2.60478	2
31	0	-0.269868	-1.12916	1.66555	2
31	1	-0.402301	-1.15992	1.79763	2
31	2	-1.0454	-1.04676	2.2683	2
31	3	-1.16459	-1.02784	2.32843	2
31	4	-1.17067	-1.02745	2.33441	2
31	5	-0.919046	-1.0156	2.1422	2
58	0	-0.72168	-0.883184	2.0971	2
58	1	-1.26559	-0.683439	2.27871	2
58	2	-1.63286	-0.456938	2.36452	2
58	3	-1.60938	-0.406394	2.28805	2
58	4	-1.14326	-0.654816	2.14447	2
58	5	-0.622821	-0.905105	2.03932	2
102	0	-4.15859	0.561467	3.14662	2
102	1	-6.40137	1.62616	3.60264	2
102	2	-6.48943	1.59587	3.64452	2
102	3	-5.58306	1.14402	3.46151	2
102	4	-5.42039	0.879949	3.55039	2
102	5	-4.08398	0.267102	3.27739	2

## Sheet: Fig2C-J
Subject	Expert 1	Expert 2	Expert 3	GT	Model
2	2	1	1	1	0
9	1	1	1	1	1
20	2	1	2	2	2
23	1	1	2	1	1
28	2	1	2	2	1
31	2	1	2	2	2
33	2	2	2	2	2
36	0	0	1	0	1
44	1	0	1	1	1
47	1	1	2	1	2
55	1	1	1	1	1
58	2	1	2	2	2
59	2	1	2	2	2
61	1	0	1	1	1
62	1	1	1	1	1
70	3	2	2	2	2
78	1	0	1	1	1
91	2	1	1	1	2
102	2	2	2	2	2
HY016	0	0	0	0	0
HY019	0	0	0	0	0
HY021	0	0	0	0	0
HY027	0	0	0	0	0
HY06	0	0	0	0	0
HY07	0	0	0	0	0

## Sheet: Fig3
Subject	Video segments	Prob 0	Prob 1	Prob 2	UPDRS score
30	1	2.36305	0.0337438	-1.64529	1
49	0	-2.49309	0.391158	3.5491	2
68	0	-4.65508	1.21143	5.06726	2
HY34	2	1.99084	0.174417	-1.28589	0
HY33	2	2.93354	-0.648054	-1.44109	0
HY41	2	3.04195	-0.573978	-1.65676	0
HY36	2	2.68448	0.336136	-2.28415	0
63	2	-2.00798	-1.7672	5.53761	2
HY34	0	3.58601	-0.200368	-2.45962	0
HY41	0	2.82028	-0.748712	-1.07966	0
63	4	-1.38003	-2.27695	5.47089	2
64	2	-5.78136	1.04253	6.62004	2
17	1	-2.54607	0.686697	3.05841	1
27	1	-3.53431	1.9867	2.73154	2
30	0	2.61147	-0.570699	-0.985987	1
HY9	2	1.11725	-0.0611947	0.00917677	0
HY28	0	3.43487	-0.353539	-2.11899	0
HY35	3	1.43921	0.435746	-1.28489	0
63	0	-1.87385	-1.79069	5.41237	2
27	4	-4.78927	1.89311	4.39948	2
HY28	4	2.88958	0.189021	-2.24264	0
104	3	-2.28141	2.69026	1.03143	2
HY41	1	2.74816	-0.183317	-1.72741	0
30	2	2.21888	-0.0203743	-1.41085	1
64	3	-5.27204	1.02633	5.97716	2
17	5	-1.11742	1.0588	1.02105	1
49	4	-2.29565	1.10779	1.99733	2
64	1	-3.71584	-1.46443	7.33673	2
HY9	3	0.982018	-0.123579	-0.0627005	0
HY28	3	2.64074	0.256824	-2.08097	0
17	0	-0.4006	1.1026	0.12376	1
HY34	1	1.99084	0.174417	-1.28589	0
63	1	-1.54	-1.34413	4.42531	2
21	3	-2.20254	2.13344	1.32758	1
14	5	-2.65143	1.78046	1.85726	2
HY36	3	2.87502	0.242025	-2.34952	0
17	3	-0.4006	1.1026	0.12376	1
76	4	-1.72112	2.30092	0.698006	1
21	0	-2.38338	2.01766	1.61756	1
HY41	5	2.55852	-0.82738	-0.749582	0
104	0	-3.62846	2.43788	2.75698	2
HY35	5	1.45759	0.692378	-1.46627	0
24	4	-1.36655	-0.414481	3.07639	1
HY35	4	1.43921	0.435746	-1.28489	0
49	2	-1.66467	1.08946	1.47663	2
64	4	-5.7151	1.09731	6.44494	2
HY36	1	4.12449	-0.170374	-2.98171	0
HY36	0	3.13399	-0.0383846	-2.17488	0
76	1	-1.72112	2.30092	0.698006	1
27	0	-3.39104	1.92035	2.73441	2
63	3	-1.63623	-1.81763	5.18132	2
21	2	-1.97095	2.17609	0.968435	1
HY36	5	2.68448	0.336136	-2.28415	0
HY9	4	0.982018	-0.123579	-0.0627005	0
24	2	-2.52546	0.185682	3.6715	1
HY33	4	3.00888	-0.645606	-1.5449	0
HY33	0	2.65417	-0.914438	-0.743274	0
76	0	0.35368	1.67622	-0.844756	1
HY33	5	2.64314	-0.99308	-0.618555	0
104	1	-2.7167	2.60893	1.55567	2
14	2	-1.98268	1.26572	1.74593	2
30	3	2.24955	-0.374114	-1.00641	1
49	3	-2.32223	0.26546	3.44119	2
HY35	2	1.85442	0.729765	-2.00007	0
49	1	-2.49309	0.391158	3.5491	2
104	4	-2.7167	2.60893	1.55567	2
HY33	3	2.81214	-0.717571	-1.12232	0
HY34	4	2.29292	-0.420965	-0.922425	0
64	5	-5.78136	1.04253	6.62004	2
27	5	-4.74334	1.79723	4.45999	2
HY35	0	3.07165	0.0471321	-2.32366	0
24	3	-2.35286	0.593813	3.03996	1
HY9	5	1.13012	0.497386	-0.870821	0
76	5	-2.30668	2.24932	1.35955	1
HY41	3	3.04195	-0.573978	-1.65676	0
HY28	2	2.65985	-0.133088	-1.56672	0
14	4	-4.0741	1.84195	3.45902	2
HY34	5	3.19223	-0.607156	-1.60872	0
104	2	-3.2572	2.25911	2.55612	2
21	4	-2.20254	2.13344	1.32758	1
21	1	-3.04012	1.69085	2.64666	1
HY41	4	2.65633	-0.542812	-1.35369	0
24	0	-1.07124	-1.14932	3.64112	1
HY36	4	4.25801	-0.18339	-3.10244	0
14	1	-4.0741	1.84195	3.45902	2
HY28	5	2.62616	0.103698	-1.90954	0
24	1	-0.588969	0.155092	1.52044	1
HY9	0	1.73648	-0.783392	0.0679663	0
63	5	-1.75179	-2.22652	5.82718	2
HY35	1	1.85442	0.729765	-2.00007	0
17	4	-0.984884	1.25861	0.603816	1
68	2	-4.67323	1.64917	4.52691	2
27	3	-4.27863	1.91068	3.69155	2
HY28	1	2.92327	-0.0477642	-1.89982	0
76	3	-1.76248	2.12819	0.925624	1
49	5	-2.29565	1.10779	1.99733	2
14	3	-1.98268	1.26572	1.74593	2
68	3	-4.56557	1.88092	4.14168	2
14	0	-2.57508	1.05699	2.67034	2
HY34	3	2.29292	-0.420965	-0.922425	0
27	2	-3.53431	1.9867	2.73154	2
68	1	-5.00432	1.27725	5.41834	2
68	4	-5.00432	1.27725	5.41834	2
24	5	-2.52546	0.185682	3.6715	1
21	5	-2.21593	1.94646	1.48613	1
30	5	2.27349	-0.21037	-1.19622	1
76	2	0.153376	1.81704	-0.781831	1
64	0	-3.35473	-1.4992	6.91996	2
HY33	1	2.65417	-0.914438	-0.743274	0
HY9	1	1.28921	-0.730889	0.6029	0
30	4	2.41766	-0.156252	-1.43067	1
104	5	-2.97054	2.55511	1.85317	2
68	5	-4.67316	1.64905	4.52696	2
17	2	-3.15546	0.854054	3.5474	1
100	0	-2.43223	0.255208	1.04031	2
93	4	0.00531231	-1.68896	0.979749	2
93	3	-2.34802	-2.95888	4.07443	2
HY1	0	3.06442	-0.775463	-2.4859	0
4	0	-4.04486	-1.71557	4.20403	2
19	0	0.624506	1.83781	-3.01234	1
19	3	1.21606	1.28623	-2.88171	1
HY37	1	3.01679	1.40298	-4.5856	0
83	3	-1.07358	0.551801	-0.193032	1
19	1	2.07268	1.06792	-3.47302	1
69	0	-4.70465	-1.67175	4.76629	2
40	5	0.134754	1.55372	-2.28239	1
53	5	-4.78509	0.528106	2.68049	2
93	5	-2.37107	-2.41567	3.55463	2
HY20	4	7.61261	-1.01235	-6.47708	0
86	1	-3.39104	-1.52827	3.55539	2
12	1	-4.06569	0.543257	2.29105	2
53	4	-4.78509	0.528106	2.68049	2
HY37	3	3.4342	0.442209	-3.9609	0
19	4	1.21606	1.28623	-2.88171	1
HY20	3	5.26202	0.217855	-5.61013	0
12	2	-4.59279	0.197454	2.99719	2
HY37	5	2.64335	1.65129	-4.56545	0
54	4	3.47641	1.61862	-5.56418	0
53	1	-4.12942	0.222731	2.48264	2
37	5	-0.863496	2.53814	-2.55731	1
83	4	-1.07358	0.551801	-0.193032	1
37	3	0.141909	1.74765	-2.58051	1
HY4	2	5.01102	-0.343321	-4.68867	0
69	1	-5.37908	0.702334	3.1055	2
HY20	5	7.61261	-1.01235	-6.47708	0
93	2	-0.736059	-1.86122	1.70641	2
29	1	-3.17219	1.06001	0.928806	1
HY4	4	3.11056	0.950804	-4.35737	0
54	2	0.0541399	2.13974	-2.93508	0
86	5	-4.07543	-1.07134	3.6114	2
86	4	-3.29694	-0.942261	2.94563	2
69	2	-4.55993	-0.226687	3.24055	2
53	3	-3.70089	0.33311	2.04595	2
HY1	2	2.20239	-0.430368	-2.0909	0
45	0	-0.279341	0.28869	-0.749715	1
HY1	1	3.37857	-0.488009	-3.05685	0
100	3	-2.43223	0.255208	1.04031	2
100	4	-4.17707	1.14133	1.76681	2
HY1	3	2.65251	-0.751574	-2.17328	0
93	1	0.0053123	-1.68896	0.979749	2
HY37	4	3.01679	1.40298	-4.5856	0
86	0	-3.92823	-1.12244	3.55878	2
HY4	1	3.82402	0.821911	-4.83067	0
100	1	-2.67999	0.491629	0.946512	2
29	4	-3.15002	0.956941	1.05537	1
4	1	-4.94851	-0.208619	3.46672	2
37	2	1.03569	1.23809	-2.93994	1
69	5	-4.70465	-1.67175	4.76629	2
HY4	3	5.80244	-0.632021	-5.1702	0
83	0	-0.447186	-1.34635	1.09134	1
32	3	1.87598	1.09234	-3.42928	0
40	1	-0.127183	1.21604	-1.70776	1
HY4	5	5.99776	-0.746419	-5.14784	0
54	5	3.37253	1.14618	-4.88393	0
93	0	-2.37107	-2.41567	3.55463	2
HY1	5	2.18873	-0.386408	-2.09053	0
12	3	-2.22874	-0.164895	1.24681	2
32	1	0.799107	2.09422	-3.5229	0
4	4	-4.91512	-0.513131	3.72826	2
37	4	0.28211	2.52929	-3.60083	1
HY20	2	6.90452	-0.317216	-6.5749	0
45	2	-2.23245	1.67514	-0.478167	1
40	4	-0.183703	1.12212	-1.5404	1
83	2	0.0727807	-0.597328	-0.0455425	1
45	1	-2.00845	1.31537	-0.27564	1
40	3	0.046774	1.42238	-2.07316	1
4	2	-5.70188	0.369052	3.45206	2
HY20	1	5.83947	-0.0943518	-5.80688	0
32	5	2.59591	0.327633	-3.20323	0
29	3	-3.63481	-0.855262	3.13174	1
4	3	-4.91512	-0.513131	3.72826	2
32	4	1.75814	1.30221	-3.47493	0
32	0	2.65718	0.28096	-3.22013	0
19	5	2.01499	0.858523	-3.13888	1
54	1	3.47641	1.61862	-5.56418	0
54	0	3.45998	1.08536	-4.91492	0
29	2	-3.17219	1.06001	0.928806	1
12	4	-4.18485	0.301846	2.60733	2
HY4	0	6.5159	-0.760914	-5.6435	0
86	3	-3.4492	-1.51157	3.57535	2
40	0	0.199856	1.57304	-2.37254	1
HY20	0	7.40722	-1.02698	-6.26982	0
100	5	-4.6464	0.682721	2.53385	2
12	5	-4.59279	0.197454	2.99719	2
45	5	-1.17394	1.09135	-0.834927	1
45	3	-0.799362	0.934505	-1.00122	1
83	1	0.44739	-0.807382	-0.150235	1
HY37	0	4.23892	0.436739	-4.69485	0
12	0	-2.22874	-0.164895	1.24681	2
37	0	1.78168	1.07392	-3.29012	1
19	2	2.07268	1.06792	-3.47302	1
54	3	2.66686	0.756742	-3.90064	0
53	0	-3.70089	0.33311	2.04595	2
4	5	-4.04486	-1.71557	4.20403	2
53	2	-3.1295	0.412293	1.44582	2
32	2	0.799107	2.09422	-3.5229	0
HY1	4	2.63886	-0.707614	-2.17291	0
45	4	-1.69396	1.73717	-1.08643	1
86	2	-3.39104	-1.52827	3.55539	2
40	2	-0.280265	1.06537	-1.40839	1
69	4	-5.37908	0.702334	3.1055	2
29	5	-2.52365	1.1277	0.418339	1
29	0	-2.66928	-0.854323	2.38057	1
69	3	-4.74662	-0.49561	3.60869	2
83	5	-1.50524	-0.308123	0.964623	1
HY37	2	1.83863	1.65676	-3.8315	0
100	2	-3.89566	-0.755588	3.1711	2
37	1	2.92721	1.06512	-4.3336	1
HY30	2	3.81128	-0.450366	-4.27675	0
57	1	-3.07195	-1.6342	3.94895	2
98	0	-0.480542	0.68097	-0.701958	1
HY22	2	2.61377	-0.35146	-3.09095	0
57	5	-2.82365	-1.20196	3.42232	2
52	1	-1.6815	0.294869	0.974867	1
81	1	-1.57028	-2.33005	3.08403	2
92	1	-1.93484	-2.32728	3.39808	2
7	2	0.655751	0.538285	-1.77349	0
82	0	-2.02786	-0.852251	2.29888	2
97	0	0.602983	0.604053	-1.80675	1
82	4	-2.21814	-1.04916	2.75656	2
87	1	-1.55251	-2.54069	3.38607	2
HY22	4	2.47831	-0.500359	-2.85023	0
87	5	-1.81771	-3.18079	4.16524	2
56	0	2.50064	-1.39627	-2.0493	0
97	1	-2.06585	-1.0521	2.53018	1
56	4	1.71484	-0.041862	-2.56912	0
HY22	0	4.15576	-2.84628	-2.55204	0
89	3	-2.52792	1.5868	0.554989	1
HY30	5	4.11399	-1.47284	-3.6315	0
81	3	-1.43329	-2.67303	3.2201	2
89	1	-1.90089	1.59116	-0.0747212	1
48	1	-0.57378	0.189866	-0.318718	1
89	2	-2.51295	1.56043	0.585111	1
82	1	-2.21814	-1.04916	2.75656	2
89	0	-2.52792	1.5868	0.554989	1
7	1	0.548971	0.816765	-1.92393	0
HY39	3	2.16977	-1.26095	-1.70373	0
57	2	-2.62893	-1.03014	3.06621	2
48	0	0.195795	-1.2348	0.265819	1
25	5	-4.01773	3.29714	-0.14585	1
60	0	-1.46126	0.294284	0.688686	2
98	2	-0.985794	0.24744	0.252353	1
HY30	1	2.54934	0.845258	-4.22154	0
94	2	-2.54356	-0.942957	3.10568	2
HY39	0	1.38781	-1.54827	-0.692347	0
HY30	3	1.84957	1.64671	-4.19086	0
25	2	-3.3947	1.75674	0.938877	1
HY40	4	1.74108	1.31635	-3.64626	0
57	4	-2.96799	-0.595321	2.93658	2
92	5	-3.32989	-1.52131	4.42193	2
HY40	1	1.74108	1.31635	-3.64626	0
7	0	0.961701	0.171221	-1.72566	0
94	1	-1.74055	-1.95365	3.02783	2
HY22	5	2.94291	-0.553262	-3.17308	0
7	3	1.5063	-0.342273	-1.83487	0
94	0	-1.93723	-2.2509	3.49545	2
HY39	4	2.9093	-1.34144	-2.37716	0
HY22	3	1.079	0.558871	-2.22981	0
92	4	-2.99818	-2.0476	4.37429	2
HY40	2	2.72147	-0.286713	-3.21771	0
97	2	-0.1004	-0.569102	0.0759119	1
48	5	-0.647574	-1.11352	1.04444	1
52	5	-2.25998	1.26777	0.747155	1
97	3	0.602983	0.604053	-1.80675	1
94	5	-2.74024	-1.24021	3.5733	2
HY39	1	1.38781	-1.54827	-0.692347	0
98	3	-0.54465	-0.24243	0.226374	1
60	5	-1.83372	1.03526	0.296373	2
87	3	-0.9802	-3.60748	3.69088	2
89	5	-0.632637	0.624096	-0.574233	1
97	5	-0.844956	-0.787721	0.963269	1
97	4	-2.06585	-1.0521	2.53018	1
56	1	1.25179	0.96248	-2.96399	0
81	2	-1.53803	-2.79075	3.49179	2
98	4	-1.74392	1.87177	-0.487678	1
60	1	-1.95183	0.998234	0.425321	2
82	2	-0.851344	-1.6414	1.84095	2
52	0	-1.20974	0.509974	0.289022	1
7	4	1.09357	0.303271	-2.03314	0
92	3	-2.26442	-2.17469	3.6677	2
48	3	-1.1869	1.04218	-0.389886	1
52	2	-1.95604	1.03101	0.629126	1
52	3	-1.29541	0.12276	0.79971	1
92	2	-2.07364	-2.5168	3.89931	2
92	0	-2.26442	-2.17469	3.6677	2
HY39	5	2.9093	-1.34144	-2.37716	0
HY40	3	3.14423	-0.200708	-3.73274	0
60	4	-1.75998	1.02707	0.170851	2
57	0	-2.79989	-1.5431	3.66427	2
82	5	-2.02786	-0.852251	2.29888	2
56	3	2.50064	-1.39627	-2.0493	0
HY22	1	2.47831	-0.500359	-2.85023	0
98	5	-0.818503	0.0125048	0.232196	1
81	4	-1.57028	-2.33005	3.08403	2
HY40	0	3.41047	-0.855331	-3.46071	0
57	3	-2.50122	-0.33241	2.29579	2
56	2	2.16874	-0.50538	-2.59861	0
94	4	-2.27779	-1.12053	2.96387	2
52	4	-1.29541	0.12276	0.79971	1
56	5	0.916985	0.521687	-2.1726	0
25	0	-1.92883	-1.59742	2.84986	1
25	3	-3.85013	3.34767	-0.346904	1
89	4	-2.85802	1.43505	1.03807	1
HY30	4	1.9564	1.72086	-4.37878	0
HY39	2	1.3964	-1.18612	-0.949763	0
94	3	-1.02125	-2.17368	2.45055	2
81	0	-0.00449744	-3.08265	2.08818	2
87	4	-1.37703	-2.77723	3.40242	2
48	4	-1.83393	1.09123	0.229273	1
7	5	1.00455	-0.256301	-1.38386	0
60	2	-2.67325	2.34777	-0.193288	2
87	2	-2.6119	-1.45328	3.58776	2
HY40	5	2.14454	-0.220832	-2.6527	0
25	4	-3.48572	3.30606	-0.676594	1
48	2	-1.41715	0.311145	0.459905	1
60	3	-1.46126	0.294284	0.688687	2
HY30	0	4.11399	-1.47284	-3.6315	0
25	1	-1.92883	-1.59742	2.84986	1
87	0	-1.81771	-3.18079	4.16524	2
82	3	-3.50814	-0.501446	3.63158	2
81	5	-0.338585	-3.12546	2.4617	2
98	1	-0.480577	0.681018	-0.701956	1
HY24	5	2.55948	-0.848746	-2.57506	0
84	3	-3.24408	1.77077	0.297991	2
74	1	0.154428	-0.279448	-0.613205	1
HY38	2	0.631154	-0.486589	-0.899752	0
77	2	0.162859	1.00552	-2.06556	1
77	0	-0.529915	0.205117	-0.539937	1
77	5	0.127282	0.770574	-1.82628	1
8	2	-4.04813	1.96469	1.03018	2
46	0	-1.4568	0.23601	0.315518	2
HY8	1	1.06339	-1.1735	-0.660037	0
10	3	-1.63356	-3.98889	4.85277	2
HY38	5	-0.14061	0.00149592	-0.545877	0
HY24	0	2.14899	-0.0972842	-2.92007	0
HY38	1	-0.47009	-0.989611	0.779986	0
10	0	-1.9113	-4.55247	5.6959	2
5	0	-1.89077	-0.71987	1.74635	1
HY31	5	0.627423	0.0888367	-1.47428	0
HY32	2	1.2448	-1.64449	-0.251156	0
85	5	-3.16718	-3.14935	5.49133	2
34	5	-1.65609	1.14748	-0.600781	1
HY8	5	0.819917	-0.604132	-1.01501	0
HY38	0	-0.47009	-0.989611	0.779986	0
HY31	0	1.90615	-1.10755	-1.53007	0
HY32	3	0.975747	-2.10729	0.492922	0
46	2	-1.96877	0.376662	0.664346	2
74	0	-1.32699	0.00453803	0.571847	1
5	1	-1.55551	-0.247139	0.886653	1
8	1	-4.14168	1.54723	1.56343	2
HY8	2	0.819917	-0.604132	-1.01501	0
HY24	1	2.14899	-0.0972842	-2.92007	0
74	3	-1.32699	0.00453804	0.571847	1
10	2	-1.77516	-3.97275	4.97294	2
HY31	2	1.85962	-0.573255	-2.08369	0
5	4	-1.94297	-0.585245	1.60505	1
42	2	-0.719932	-0.188095	0.0236781	1
85	2	-2.98417	-3.29668	5.47861	2
95	1	-2.88153	1.85722	0.0215751	1
5	2	-3.84272	0.552588	2.21282	1
8	4	-4.98875	0.299026	3.6368	2
HY31	3	1.90615	-1.10755	-1.53007	0
42	0	1.71754	-0.536139	-2.00775	1
HY32	0	0.975747	-2.10729	0.492922	0
34	2	-1.26406	0.94274	-0.794179	1
10	4	-1.63356	-3.98889	4.85277	2
84	0	-1.50668	1.72861	-1.17132	2
34	0	-0.791496	0.61699	-0.811785	1
HY24	4	2.48062	-0.557151	-2.80209	0
95	3	-4.24975	2.76633	0.314892	1
84	5	-2.50131	1.10141	0.324064	2
84	1	-2.0072	2.14533	-1.19304	2
84	2	-2.53754	1.30599	0.152528	2
HY8	0	1.08653	-1.18828	-0.648651	0
HY42	3	2.01826	-0.820346	-1.87059	0
HY31	4	2.24325	-0.761339	-2.28496	0
84	4	-2.50131	1.10141	0.324064	2
80	4	-1.10623	-0.70565	1.00828	2
HY32	4	0.584689	-1.6423	0.469227	0
HY42	0	1.02803	-0.418404	-1.32459	0
HY38	4	0.643909	-0.696785	-0.616772	0
HY42	2	1.85426	-0.991001	-1.57548	0
34	1	-0.399473	0.412252	-1.00518	1
HY42	5	0.944518	-1.32488	-0.24645	0
HY24	2	2.51742	-0.729654	-2.6119	0
42	1	-0.719932	-0.188095	0.0236781	1
46	1	-2.39173	0.299086	1.06573	2
80	2	-1.43718	-0.282387	0.824062	2
HY42	1	1.02803	-0.418404	-1.32459	0
10	5	-1.61299	-4.06832	4.95454	2
5	3	-3.84272	0.552588	2.21282	1
46	3	-1.4568	0.23601	0.315518	2
42	4	-2.19539	-0.920848	2.01209	1
34	4	0.0437883	0.480909	-1.48777	1
HY38	3	0.643909	-0.696785	-0.616772	0
46	5	-0.835402	-0.214975	0.161113	2
HY8	3	1.10862	-0.558218	-1.34308	0
85	0	-1.76089	-2.27155	3.22283	2
85	3	-2.24263	-2.71848	4.12105	2
42	3	-2.21708	-0.664051	1.77307	1
8	0	-4.50901	0.548748	2.92318	2
95	0	-2.88153	1.85722	0.0215751	1
74	2	0.563032	-0.471758	-0.814738	1
80	0	-1.35882	-1.02288	1.62535	2
85	4	-3.03884	-2.92818	5.09095	2
80	1	-0.751016	1.55992	-1.72267	2
80	3	-1.43718	-0.282387	0.824062	2
8	3	-2.74528	0.643085	1.16062	2
HY31	1	0.507846	0.616726	-1.9164	0
95	4	-4.24975	2.76633	0.314892	1
74	5	-0.269984	0.666187	-1.21079	1
95	2	-3.78697	2.05132	0.579326	1
HY42	4	1.30078	0.04147	-2.0952	0
77	1	0.162859	1.00552	-2.06556	1
HY24	3	1.04676	0.447064	-2.37471	0
5	5	-1.94297	-0.585245	1.60505	1
8	5	-4.50901	0.548748	2.92318	2
95	5	-3.78697	2.05132	0.579326	1
46	4	-2.66531	-0.161669	1.85739	2
42	5	-0.493679	-0.679567	0.335309	1
34	3	-2.47973	0.805499	0.756076	1
74	4	-0.269984	0.666187	-1.21079	1
77	4	0.242987	0.33602	-1.45527	1
10	1	-1.9113	-4.55247	5.6959	2
HY32	1	0.780944	-1.64511	0.294465	0
HY8	4	1.15253	-0.580861	-1.3708	0
80	5	-1.08657	-0.241268	0.585151	2
85	1	-3.03884	-2.92818	5.09095	2
HY32	5	0.707079	-1.67298	0.33148	0
77	3	-0.529915	0.205117	-0.539937	1
HY17	3	2.79482	0.872921	-2.91366	0
38	3	-5.2066	1.24586	3.06348	2
HY29	1	1.35818	0.946474	-1.88385	0
HY29	2	0.898599	0.969026	-1.50808	0
HY23	4	2.30645	1.19822	-2.90228	0
43	4	0.384372	1.64917	-1.88686	0
38	0	-4.435	1.33571	2.4318	2
99	0	-0.524232	1.46544	-0.991247	1
41	1	-0.635823	0.394154	0.427167	2
50	1	1.17309	0.739098	-1.47186	2
79	2	-2.41957	-0.479062	2.91937	2
50	0	0.872283	0.769459	-1.26758	2
99	4	-0.680501	1.17909	-0.563881	1
75	3	2.46353	0.377269	-2.11067	0
43	3	0.384372	1.64917	-1.88686	0
HY15	2	1.38302	0.437021	-1.46016	0
11	4	-4.78612	0.553532	3.6112	2
HY23	0	2.4229	1.45864	-3.4172	0
HY23	1	1.65752	1.36103	-2.69543	0
79	0	-1.50634	-0.437363	2.32225	2
99	3	-0.524232	1.46544	-0.991247	1
67	2	-1.8296	0.917569	0.714047	1
22	2	-0.341424	0.649915	-0.212205	1
71	1	-2.5228	1.13963	1.00557	1
39	2	-0.145853	-0.941489	1.5581	2
HY23	2	1.58134	1.14221	-2.28449	0
26	2	0.331249	1.07716	-1.26779	1
HY15	1	1.38302	0.437021	-1.46016	0
HY15	5	1.93471	0.417628	-1.85106	0
71	5	-2.56796	1.11956	1.06522	1
HY29	3	0.891072	0.879428	-1.4748	0
50	4	-0.679563	1.42508	-0.825837	2
39	4	-0.0655672	-0.974695	1.49687	2
41	3	-0.867464	0.19925	0.790199	2
HY15	3	2.00769	0.62236	-2.07382	0
43	0	0.685729	1.88504	-2.32264	0
50	5	-0.398832	1.38413	-1.00992	2
6	0	-1.13601	0.695581	0.146364	1
75	4	2.44221	0.615534	-2.42189	0
39	1	0.0247528	-0.92136	1.37577	2
22	5	0.31463	0.51902	-0.545282	1
71	3	-2.93325	1.07185	1.43031	1
11	0	-4.32441	0.132161	3.63025	2
41	0	-0.220594	0.242056	0.298704	2
50	3	-0.679563	1.42508	-0.825837	2
79	5	-2.29156	-0.603258	2.9267	2
HY17	1	2.93005	0.920636	-3.08391	0
HY23	5	2.34672	1.23981	-3.00626	0
26	3	0.793815	1.10979	-1.69728	1
HY17	2	2.65264	0.861231	-2.82809	0
22	1	-0.462678	0.655025	-0.0915367	1
26	1	0.688767	1.2114	-1.69311	1
22	0	0.314631	0.51902	-0.545282	1
6	5	-1.09538	0.693643	0.0853966	1
HY29	4	0.891073	0.879428	-1.4748	0
39	5	-0.0145028	-1.02034	1.58094	2
79	1	-2.09419	-0.416585	2.67327	2
26	4	0.346383	1.10753	-1.31049	1
HY17	4	2.87709	0.879097	-3.05281	0
50	2	-0.0585002	1.51467	-1.38127	2
38	2	-4.99123	1.25889	2.8874	2
75	5	2.38652	0.326531	-2.01702	0
75	0	2.46353	0.377269	-2.11067	0
HY15	0	2.00769	0.62236	-2.07382	0
67	4	-1.60081	0.622614	0.861159	1
HY23	3	2.30645	1.19822	-2.90228	0
43	5	-0.087926	1.74807	-1.60334	0
67	0	-2.01068	1.42406	0.350631	1
HY29	5	0.794509	0.927712	-1.41468	0
43	1	0.414087	1.77355	-2.03144	0
6	1	-1.13601	0.695581	0.146364	1
71	4	-2.93325	1.07185	1.43031	1
71	0	-2.95194	1.3275	1.19073	1
39	3	-0.236174	-0.994824	1.67919	2
26	5	0.331249	1.07716	-1.26779	1
41	5	-0.646048	0.177284	0.660291	2
6	3	-0.703087	0.969339	-0.467703	1
HY29	0	1.09781	0.942593	-1.67058	0
11	2	-4.96742	0.68146	3.59285	2
11	1	-4.02742	0.0810405	3.58654	2
26	0	0.432565	0.965502	-1.20923	1
22	3	0.741742	0.679559	-1.05136	1
38	1	-4.435	1.33571	2.4318	2
39	0	0.00573973	-1.00006	1.56856	2
71	2	-3.10577	1.12497	1.49633	1
41	4	-0.418402	0.276887	0.392184	2
22	4	0.29367	0.653816	-0.689289	1
67	5	-1.8296	0.917569	0.714047	1
11	3	-4.33376	0.100051	3.64645	2
HY17	5	2.75844	0.865435	-2.88178	0
79	3	-1.98675	-0.499774	2.65934	2
99	5	-0.111154	1.02028	-0.877234	1
38	5	-4.99123	1.25889	2.8874	2
99	2	-0.111154	1.02028	-0.877234	1
43	2	0.581749	1.63136	-2.00669	0
38	4	-5.07287	1.29054	2.91548	2
41	2	-1.08488	0.316517	0.825182	2
67	3	-2.01068	1.42406	0.350631	1
99	1	-0.680501	1.17909	-0.563881	1
6	4	-0.782564	0.968733	-0.455228	1
67	1	-1.47834	1.3641	-0.0697077	1
6	2	-0.670181	0.988266	-0.530514	1
75	2	2.61244	0.529589	-2.50067	0
79	4	-1.85873	-0.623969	2.66667	2
75	1	2.61244	0.529589	-2.50067	0
HY15	4	1.7941	0.420021	-1.72426	0
HY17	0	2.93005	0.920637	-3.08391	0
11	5	-5.0831	0.604653	3.65491	2

## Sheet: Fig4A
Motion marker	UPDRS 0	UPDRS 1	UPDRS 2
Velocity_big toe_data	0.247878	0.316361	0.30983
	0.381866	0.268679	0.276378
	0.340245	0.337237	0.227404
	0.366744	0.391717	0.204581
	0.330576	0.291392	0.178176
	0.363026	0.28305	0.310838
	0.339801	0.25678	0.135028
	0.368363	0.259503	0.203128
	0.244275	0.222782	0.206035
	0.270651	0.315708	0.242962
	0.39853	0.311481	0.217347
	0.378064	0.279443	0.338605
	0.299984	0.25047	0.249294
	0.369398	0.339214	0.259681
	0.255842	0.324014	0.161128
	0.284532	0.31292	0.232779
	0.273669	0.323723	0.179899
	0.34324	0.268442	0.126111
	0.402607	0.368582	0.18638
	0.356531	0.287351	0.207262
	0.334686	0.367242	0.267118
	0.389388	0.306674	0.248818
	0.274198	0.405536	0.121304
	0.399433	0.273004	0.147893
	0.373408	0.340322	0.191797
	0.373003	0.331118	0.232653
	0.270899	0.35835	0.286843
	0.334912	0.368347	0.183711
	0.285974	0.297637	0.356946
	0.307019	0.38523	0.192412
	0.350296	0.0626884	0.19187
	0.337062	0.305558	0.231598
	0.321643	0.286659	0.110406
	0.271786	0.239666	0.129591
	0.300079	0.321562	0.303033
	0.337869	0.412079	0.230403
	0.384097	0.346224	0.25314
	0.333504	0.318045	0.172724
	0	0.329245	0.275603
	0	0	0.260272
	0	0	0.152838
Acceleration_knee_data	0.00397898	0.00395586	0.00431066
	0.0131737	0.00373509	0.00430828
	0.00918305	0.00844384	0.00323664
	0.00488086	0.00403358	0.0058953
	0.00806147	0.00555829	0.00330602
	0.00506561	0.00631592	0.0118907
	0.0129618	0.0105541	0.00341177
	0.00895224	0.00615625	0.00665344
	0.00423444	0.00401713	0.0178713
	0.00304373	0.00475	0.00625011
	0.00738221	0.00765701	0.00538373
	0.00936641	0.00583435	0.0104767
	0.00504368	0.00625124	0.00342913
	0.0134438	0.00530915	0.00538324
	0.00516796	0.00767438	0.00726929
	0.00454456	0.00633863	0.00569234
	0.00798224	0.00736343	0.00709675
	0.00703478	0.00973649	0.00229606
	0.00356799	0.00721153	0.0020898
	0.00840037	0.00639274	0.00900274
	0.00674544	0.011212	0.00590531
	0.0103262	0.00412346	0.00416802
	0.00652105	0.0057769	0.00505182
	0.00916545	0.0042712	0.015143
	0.00863851	0.00431189	0.00669012
	0.00690267	0.00551686	0.00508869
	0.0036619	0.0185569	0.00466589
	0.00768439	0.0086061	0.00749716
	0.00660567	0.00604385	0.00554196
	0.00984228	0.00535196	0.00515078
	0.00658581	0.00745688	0.0100515
	0.00921762	0.00611359	0.00690648
	0.0100344	0.00766563	0.00351736
	0.00553443	0.00505293	0.00679934
	0.005744	0.0117994	0.00614088
	0.00722369	0.00754162	0.0032609
	0.00684214	0.00657274	0.0125416
	0.00556569	0.00591081	0.00443095
	0	0.00721806	0.00839817
	0	0	0.00518593
	0	0	0.00201663
Mean Angle_shoulder_data	108.906	101.374	86.5296
	99.4642	104.44	100.243
	107.799	83.2653	90.2672
	95.9047	101.615	102.184
	106.931	89.7269	122.562
	94.105	94.6788	95.1235
	101.359	100.687	92.8424
	112.516	107.445	90.0116
	88.8556	100.915	90.7693
	86.3677	98.0012	131.472
	84.977	93.6955	99.897
	108.434	74.1337	102.04
	99.0573	112.267	87.8368
	104.908	124.616	118.979
	95.3947	103.594	82.0959
	82.3378	84.5558	123.089
	94.7351	104.262	90.6552
	106.32	88.0881	91.1024
	89.5254	106.469	106.223
	103.204	96.3129	94.7605
	114.655	101.992	99.6539
	92.641	101.41	87.2733
	89.1917	100.477	92.4247
	112.659	95.1487	98.4264
	110.79	116.677	78.8117
	114.13	85.6636	72.4004
	100.888	91.8508	108.385
	110.297	112.676	93.9773
	104.6	95.4093	115.401
	100.503	100.662	89.5909
	123.254	86.9574	103.388
	80.7062	73.531	92.3041
	105.681	82.0792	88.974
	87.5801	97.0039	88.1596
	112.355	86.9945	95.131
	112.992	108.17	91.3389
	101.521	103.485	86.9727
	114.395	105.006	94.7838
	0	103.952	103.887
	0	0	96.175
	0	0	102.784
Velocity_neck_data	0.2512	0.326434	0.314035
	0.388606	0.263155	0.266517
	0.330675	0.316864	0.211567
	0.365196	0.386908	0.209033
	0.319884	0.291648	0.167314
	0.353	0.285919	0.275176
	0.327905	0.263844	0.132024
	0.377197	0.243009	0.200761
	0.240693	0.220584	0.208993
	0.268071	0.309969	0.222954
	0.393801	0.309641	0.218557
	0.360341	0.264287	0.350007
	0.306153	0.241022	0.248118
	0.353823	0.311481	0.252551
	0.265015	0.329854	0.164661
	0.281055	0.346723	0.226881
	0.276404	0.312182	0.205179
	0.325015	0.265737	0.121211
	0.392626	0.358954	0.190341
	0.34821	0.277397	0.204071
	0.331098	0.329394	0.275458
	0.39831	0.299028	0.246813
	0.263	0.37831	0.121483
	0.386984	0.260326	0.141918
	0.371519	0.31824	0.192206
	0.366938	0.331941	0.222365
	0.262781	0.311009	0.304221
	0.33155	0.347139	0.181966
	0.268422	0.27922	0.35652
	0.291136	0.390155	0.187255
	0.342241	0.0632983	0.18428
	0.245581	0.303847	0.227067
	0.314178	0.328869	0.110778
	0.262973	0.237993	0.106971
	0.305646	0.322225	0.354767
	0.320516	0.38865	0.222396
	0.383346	0.342594	0.254045
	0.335047	0.30808	0.170123
	0	0.332179	0.263612
	0	0	0.245631
	0	0	0.153706
Std Dev Angle_shoulder_data	14.1335	19.9789	11.1753
	21.7398	17.2875	7.88074
	22.7881	17.2106	13.8639
	21.5641	16.2646	8.0353
	16.9895	11.5766	22.2485
	21.1047	8.15767	13.2424
	18.9305	9.1039	12.0585
	17.7661	18.3127	3.39421
	5.98122	15.9576	9.49191
	10.7595	17.7502	21.3478
	17.212	12.4255	13.0411
	20.7628	10.9265	23.3224
	16.2179	20.5243	6.79406
	17.3121	23.8726	20.8127
	7.13721	15.7058	4.74529
	7.82665	13.5042	27.8497
	10.8828	16.16	8.53164
	16.1254	17.3324	5.63379
	19.8563	19.6769	6.93237
	21.2087	20.2289	16.6506
	19.2913	21.559	11.9375
	8.91851	18.545	5.44094
	10.4277	22.79	3.55856
	22.8656	11.1727	5.72329
	24.6409	24.7314	6.65318
	19.5109	12.7752	9.90698
	13.2187	15.0801	22.4785
	17.3469	23.3905	11.0505
	16.6838	14.9616	24.1026
	16.5501	19.6817	8.34127
	21.8405	9.92219	12.3107
	16.1137	21.5224	16.0323
	19.8879	16.7157	6.64235
	12.7559	19.969	9.41902
	18.4026	17.6717	16.9406
	18.3417	21.4	5.21412
	18.9797	16.5147	14.7924
	18.9136	25.593	7.34615
	0	12.8924	9.82259
	0	0	7.67213
	0	0	15.1041
Mean Angle_hip_data	176.837	177.725	177.304
	177.555	177.668	176.67
	176.843	176.611	176.685
	177.43	177.604	176.729
	176.71	176.212	177.579
	176.463	176.475	176.758
	176.934	176.533	176.785
	176.637	177.641	175.879
	176.847	177.145	176.965
	176.959	176.47	177.847
	176.98	176.419	177.569
	177.612	177.127	177.332
	177.26	177.237	176.744
	177.421	177.596	177.861
	176.686	177.236	175.942
	176.669	177.822	177.501
	176.814	176.357	175.455
	177.161	177.204	175.97
	176.875	176.514	176.461
	176.866	176.783	178.006
	176.764	176.876	176.892
	177.007	176.627	175.995
	176.541	177.942	175.964
	176.559	176.956	175.586
	177.499	177.296	176.713
	176.95	176.995	176.418
	176.409	176.064	177.184
	177.512	178.041	175.948
	176.896	177.538	175.438
	177.579	178.124	175.952
	177.766	175.47	176.562
	176.89	177.439	177.529
	176.267	175.196	176.47
	177.024	176.818	175.428
	176.64	175.939	177.119
	176.988	177.841	176.428
	177.458	176.694	175.971
	177.208	177.169	176.386
	0	177.021	176.556
	0	0	175.347
	0	0	177.123
Acceleration_hip_data	0.00374316	0.00312045	0.00364213
	0.00718524	0.00568038	0.00401662
	0.00696205	0.0158122	0.00262776
	0.00323008	0.00510121	0.00340625
	0.00476148	0.0040401	0.00215547
	0.00424199	0.00240412	0.109129
	0.00583175	0.00271875	0.00195189
	0.0068056	0.00400324	0.00282904
	0.00284683	0.00260396	0.0031676
	0.00169896	0.00381572	0.00512012
	0.00424014	0.00531251	0.00278953
	0.00315384	0.00249708	0.00832956
	0.00539495	0.00468876	0.00353279
	0.00655224	0.00497235	0.00575933
	0.00606126	0.00815653	0.00201657
	0.00320664	0.00606831	0.00485899
	0.00632502	0.00437634	0.00543195
	0.00632376	0.00304006	0.00317302
	0.00485158	0.00470661	0.00319761
	0.00571438	0.00641295	0.0047208
	0.00497269	0.0479124	0.00281386
	0.00850045	0.0138748	0.00429126
	0.00635098	0.00420883	0.00263169
	0.00573933	0.0028613	0.00245974
	0.00515226	0.00654624	0.00163287
	0.00515252	0.00694929	0.00476474
	0.00359135	0.0267173	0.00476062
	0.00447402	0.00609254	0.00459144
	0.00222519	0.020692	0.00635743
	0.00473698	0.00479404	0.00298443
	0.0067585	0.00856343	0.00744668
	0.0938793	0.00533635	0.00511414
	0.00459331	0.0755944	0.00218248
	0.00595071	0.00533197	0.00997551
	0.005586	0.00451162	0.091364
	0.00451207	0.00350731	0.00192756
	0.00746912	0.00550069	0.00489679
	0.00495141	0.00495304	0.00285975
	0	0.00303491	0.00413996
	0	0	0.00425591
	0	0	0.00263615
Velocity_heel_data	0.253895	0.32197	0.301372
	0.383218	0.275618	0.268533
	0.343686	0.325993	0.220828
	0.378209	0.397337	0.208324
	0.323071	0.290354	0.170537
	0.368603	0.283513	0.292342
	0.342984	0.265203	0.134883
	0.377009	0.258751	0.205494
	0.240163	0.211534	0.19937
	0.27022	0.305424	0.240767
	0.402238	0.311711	0.219805
	0.385743	0.292138	0.351269
	0.30714	0.239257	0.246616
	0.365803	0.333765	0.258942
	0.263694	0.318187	0.158575
	0.283509	0.324945	0.229718
	0.2812	0.319894	0.184895
	0.326619	0.258255	0.128416
	0.40669	0.368887	0.184748
	0.365396	0.280963	0.205447
	0.343887	0.364462	0.268842
	0.398984	0.310813	0.250317
	0.277811	0.392559	0.120101
	0.394215	0.277372	0.14136
	0.375109	0.329928	0.180876
	0.380686	0.327719	0.236956
	0.266235	0.359251	0.281939
	0.325965	0.356856	0.177571
	0.275697	0.300293	0.352332
	0.310941	0.392666	0.193025
	0.353752	0.0536702	0.186308
	0.320998	0.302062	0.229281
	0.32274	0.296988	0.113579
	0.283567	0.236964	0.111198
	0.304283	0.315298	0.300265
	0.337268	0.403326	0.225605
	0.398698	0.345854	0.25544
	0.33607	0.313934	0.165685
	0	0.332455	0.278815
	0	0	0.249079
	0	0	0.160058
Acceleration_wrist_data	0.00247006	0.00111121	0.00193765
	0.00381758	0.00222853	0.00361673
	0.00504033	0.00379442	0.00268721
	0.00544298	0.00248778	0.00187669
	0.00435354	0.00146339	0.000980171
	0.00223027	0.00199873	0.000851855
	0.00412546	0.00243066	0.00115152
	0.00186978	0.00123603	0.00136289
	0.00132947	0.00643737	0.00164286
	0.000297518	0.0020878	0.00163478
	0.0016616	0.00332307	0.00214861
	0.00354958	0.00117849	0.00361663
	0.00269318	0.002454	0.00112993
	0.00369742	0.00232888	0.00223462
	0.00198433	0.00384687	0.00219174
	0.0021322	0.00208998	0.00200231
	0.00287398	0.00234364	0.000967567
	0.0108265	0.00132903	0.00254623
	0.00496115	0.00195092	0.000472527
	0.00414404	0.0048722	0.00145887
	0.00419013	0.00349075	0.00160427
	0.00433671	0.00181936	0.00172979
	0.00287219	0.00215217	0.000857956
	0.00634197	0.00150796	0.0010365
	0.00256842	0.00248929	0.000956075
	0.00357411	0.00235872	0.00131408
	0.00206569	0.00586178	0.0020992
	0.00448998	0.00286515	0.00202953
	0.0042451	0.018589	0.00272902
	0.00393862	0.00299288	0.00157413
	0.00577355	0.00427041	0.0054012
	0.00635547	0.00394388	0.00123477
	0.00335508	0.00340774	0.000479067
	0.00231655	0.00157979	0.000896477
	0.00316472	0.0023925	0.00275385
	0.00368828	0.00557375	0.00138049
	0.00708862	0.00204277	0.00335041
	0.00298402	0.00228348	0.00110538
	0	0.00375929	0.00214431
	0	0	0.00201896
	0	0	0.000866773
Acceleration_neck_data	0.00411022	0.00169146	0.002618
	0.00786919	0.00221174	0.00277657
	0.00598083	0.00793132	0.00181137
	0.00266413	0.00357407	0.00363828
	0.00214028	0.00238662	0.0025807
	0.00338713	0.00307561	0.023936
	0.00569098	0.00271669	0.00225646
	0.004779	0.002807	0.0020132
	0.00211337	0.00206663	0.0016134
	0.00154121	0.00388544	0.00287709
	0.00427045	0.00221104	0.0035677
	0.00154296	0.00244198	0.0091403
	0.00322994	0.00479094	0.00354018
	0.00567202	0.00302089	0.00295948
	0.00410086	0.0048691	0.00169367
	0.00295281	0.00256313	0.00315242
	0.00658812	0.00399173	0.00400065
	0.00451934	0.00195732	0.00204284
	0.00430673	0.00262238	0.00190612
	0.00509743	0.00533871	0.00208986
	0.00426229	0.0202666	0.00247233
	0.00638264	0.0164281	0.00302966
	0.00381222	0.00396877	0.00222057
	0.0061136	0.00241076	0.00126226
	0.00301952	0.00527508	0.00175795
	0.00553868	0.00608148	0.00237217
	0.00297625	0.0353303	0.0033863
	0.00416697	0.00417217	0.00355824
	0.00382182	0.00854416	0.00449588
	0.00375711	0.00209742	0.00218879
	0.00611284	0.00625875	0.00742886
	0.140396	0.00477448	0.00102961
	0.0030633	0.17127	0.00148429
	0.00402028	0.003535	0.0214003
	0.00336327	0.00309524	0.128244
	0.00272509	0.00243374	0.00159255
	0.00708665	0.00433098	0.00591329
	0.00257627	0.00293582	0.00131161
	0	0.0039617	0.00289915
	0	0	0.00397777
	0	0	0.00188246
Std Dev Angle_neck_data	3.05566	3.73426	2.78962
	3.62223	3.19701	3.81186
	3.37543	8.29976	3.14922
	4.23948	3.10739	1.15595
	3.42764	2.39339	2.0702
	4.8002	2.13994	5.25786
	2.65897	2.42365	2.02755
	3.24354	3.53401	1.90879
	3.44963	3.11994	1.65033
	1.97369	2.9869	4.1124
	4.115	3.44747	2.87114
	5.06851	3.14361	4.49347
	3.89421	3.77683	2.68113
	3.13187	2.9132	3.41061
	2.26798	3.8161	2.43457
	3.02864	3.49595	2.89224
	3.50301	4.88323	1.50394
	2.96628	2.16165	1.81686
	3.48308	3.77505	1.70268
	3.36331	3.01483	2.73081
	2.65782	4.56423	2.41066
	2.42332	6.07261	2.23443
	3.35113	4.48332	2.04875
	3.60842	6.25918	3.0389
	3.25775	2.98506	2.48963
	2.621	3.343	2.74015
	2.47861	6.92358	2.01982
	3.97757	4.03493	3.27213
	3.6578	2.53022	3.12392
	2.92045	3.03735	1.99344
	3.56821	3.99431	3.26908
	12.5674	3.38909	3.53765
	2.9065	10.1185	2.33034
	3.41517	4.36245	7.03754
	2.469	3.55282	5.86188
	2.64277	5.92627	1.68016
	4.0295	3.98092	3.70703
	5.22283	5.46942	1.64667
	0	1.95857	1.56582
	0	0	1.36408
	0	0	1.53218
Velocity_shoulder_data	0.129173	0.169915	0.159941
	0.201204	0.136372	0.138572
	0.170807	0.146165	0.112774
	0.190268	0.200478	0.1074
	0.165523	0.152794	0.0875395
	0.182623	0.145684	0.153603
	0.168887	0.134386	0.0690934
	0.194795	0.129289	0.103976
	0.1234	0.115804	0.107765
	0.13773	0.162318	0.116047
	0.202666	0.158489	0.114136
	0.188655	0.137779	0.181951
	0.159514	0.127137	0.129067
	0.182999	0.164205	0.130139
	0.135881	0.171056	0.085791
	0.143144	0.176413	0.121784
	0.141381	0.163039	0.107798
	0.16633	0.1392	0.063803
	0.201918	0.185475	0.0988507
	0.18048	0.144696	0.105504
	0.170098	0.180309	0.140871
	0.203383	0.158591	0.126362
	0.137105	0.196971	0.0622375
	0.201862	0.13606	0.0730676
	0.193894	0.16926	0.101244
	0.189371	0.173155	0.115956
	0.135485	0.18355	0.158417
	0.171704	0.179909	0.0971577
	0.141548	0.143249	0.178026
	0.151107	0.202472	0.0990448
	0.177734	0.0365783	0.100424
	0.170193	0.158481	0.119203
	0.161636	0.174183	0.0564423
	0.137127	0.122819	0.0624931
	0.15759	0.168944	0.162983
	0.165444	0.202958	0.115841
	0.198499	0.181617	0.13472
	0.175337	0.160358	0.0893527
	0	0.171564	0.134914
	0	0	0.126056
	0	0	0.0795136
Std Dev Angle_elbow_data	2.11603	1.97706	5.06152
	5.67083	2.49028	3.72086
	7.1488	4.98567	5.19975
	6.57838	3.78327	2.10443
	7.31426	1.96212	3.36104
	7.36292	4.95698	6.63063
	5.56093	4.61882	4.41665
	5.66537	4.99535	2.59341
	3.813	5.28673	2.91982
	3.11042	3.54226	2.01484
	6.17266	2.82307	3.07833
	7.23318	3.39486	7.58732
	2.80591	4.21018	1.2608
	8.37517	3.84654	4.25517
	5.32233	6.4828	3.72601
	4.42686	5.83195	3.25112
	4.36048	2.96345	4.63907
	6.53768	1.72096	2.67878
	16.9721	8.15456	2.12372
	7.48266	4.37615	4.36125
	6.1213	4.13019	2.97632
	4.7406	3.68044	3.48552
	3.73807	7.00803	1.86747
	5.80608	4.28467	3.21071
	5.91771	8.29115	2.12918
	6.96082	5.16625	4.30273
	6.01822	12.9811	4.02258
	5.07485	4.0605	2.78044
	4.53385	12.5417	4.42987
	3.68124	5.19423	2.56538
	7.29699	10.0636	2.7308
	6.35441	4.61903	2.32148
	7.37463	12.9764	1.26414
	3.49834	3.53348	5.84266
	6.9635	4.73201	4.49797
	5.35175	11.3588	2.5943
	9.53715	5.17208	1.57253
	6.39397	6.12394	1.81307
	0	3.51304	3.40381
	0	0	5.82305
	0	0	2.28382
Velocity_knee_data	0.254348	0.328171	0.316615
	0.3877	0.277536	0.26991
	0.343164	0.307481	0.213534
	0.380594	0.39294	0.199954
	0.329296	0.295604	0.172988
	0.363577	0.28796	0.324823
	0.339397	0.257036	0.135428
	0.384466	0.252881	0.202852
	0.248044	0.224243	0.210233
	0.267047	0.317617	0.240189
	0.410467	0.312353	0.224959
	0.383506	0.283088	0.356339
	0.313333	0.248241	0.248989
	0.367944	0.322563	0.26085
	0.271855	0.324019	0.16862
	0.284671	0.341711	0.234845
	0.287134	0.323821	0.197808
	0.338881	0.273111	0.125403
	0.401405	0.365618	0.190276
	0.361123	0.279038	0.209177
	0.339216	0.332529	0.276796
	0.405829	0.330701	0.249209
	0.271442	0.391031	0.125028
	0.395952	0.278251	0.144179
	0.379741	0.321804	0.196698
	0.382238	0.338603	0.232884
	0.266456	0.339381	0.29899
	0.338063	0.365722	0.189075
	0.281116	0.293462	0.361192
	0.304982	0.394489	0.192101
	0.35737	0.0609969	0.191191
	0.284606	0.308568	0.237508
	0.322951	0.27574	0.11415
	0.270307	0.242581	0.120317
	0.313585	0.326124	0.298954
	0.33194	0.406951	0.227039
	0.395863	0.351749	0.250867
	0.344995	0.312691	0.172025
	0	0.33765	0.276849
	0	0	0.253692
	0	0	0.157593
Velocity_elbow_data	0.131841	0.172591	0.161234
	0.204542	0.139928	0.144543
	0.174099	0.170434	0.11488
	0.200727	0.20296	0.108912
	0.169496	0.153628	0.0900894
	0.188566	0.149911	0.151266
	0.17298	0.134525	0.0705247
	0.200319	0.136039	0.108244
	0.124777	0.117964	0.108393
	0.139396	0.169352	0.121146
	0.214509	0.157731	0.121657
	0.199536	0.145693	0.183873
	0.163342	0.131553	0.130357
	0.192723	0.170508	0.135116
	0.139924	0.176849	0.0865906
	0.146755	0.181449	0.123302
	0.143444	0.168261	0.109014
	0.169948	0.140574	0.0648138
	0.207254	0.189363	0.100551
	0.187504	0.149207	0.109249
	0.176352	0.181009	0.14482
	0.207206	0.16207	0.129497
	0.141145	0.209018	0.0634403
	0.214816	0.142661	0.0736289
	0.194793	0.180659	0.101792
	0.199019	0.177814	0.117759
	0.137014	0.187628	0.158633
	0.173392	0.184487	0.100872
	0.146603	0.147764	0.184614
	0.157952	0.203083	0.102144
	0.181654	0.0377761	0.102598
	0.16981	0.161516	0.125901
	0.167957	0.162436	0.0573296
	0.141088	0.12596	0.0579134
	0.16186	0.172207	0.155198
	0.169942	0.208203	0.120244
	0.200016	0.185612	0.136561
	0.180227	0.167627	0.0920613
	0	0.17453	0.13742
	0	0	0.126168
	0	0	0.0818475
Acceleration_head_data	0.00381635	0.00186737	0.00299145
	0.00724924	0.00150798	0.00309409
	0.0059527	0.0133083	0.00208898
	0.0023437	0.00363569	0.00349461
	0.00237157	0.00311422	0.00230419
	0.00281356	0.00225948	0.0914617
	0.00540056	0.00235355	0.00135185
	0.00515144	0.00253929	0.0022647
	0.00291606	0.00196702	0.0014838
	0.0013994	0.00278715	0.00207961
	0.00382933	0.00134677	0.00253295
	0.00147665	0.00287185	0.0100196
	0.00406941	0.00432062	0.00272639
	0.00510159	0.0043231	0.00357989
	0.00311867	0.00465441	0.00203123
	0.00249925	0.00296572	0.00360527
	0.00561058	0.00361127	0.00409049
	0.00365653	0.00240676	0.00253924
	0.00308734	0.00260964	0.0021509
	0.00249499	0.00508226	0.00165105
	0.00424866	0.056711	0.00245624
	0.0060406	0.0175693	0.00281139
	0.00382286	0.00595999	0.00152881
	0.00572811	0.00181087	0.00197264
	0.0036029	0.00276999	0.00154497
	0.00573885	0.00530969	0.00234448
	0.00231812	0.0208839	0.00338175
	0.00484782	0.00572731	0.00309652
	0.00342786	0.00660513	0.0029424
	0.00290894	0.00311337	0.00266465
	0.00457632	0.00621437	0.00436876
	0.169096	0.00464944	0.00132081
	0.00223524	0.121254	0.00128654
	0.0040932	0.00421163	0.00295085
	0.00257451	0.00357538	0.0745815
	0.00263029	0.00317639	0.00141573
	0.00779472	0.00302091	0.00536221
	0.00231614	0.00352051	0.00115153
	0	0.00317052	0.00129428
	0	0	0.00293419
	0	0	0.00188048
Cadence_ankle_data	96.497	103.572	118.635
	112.981	106.124	110.534
	114.044	124.481	116.198
	119.917	116.928	111.96
	112.088	107.578	93.0678
	108.26	95.8639	112.617
	112.523	115.659	95.8303
	108.727	92.3879	106.879
	91.0487	97.2991	103.719
	93.8389	116.218	93.0673
	103.437	113.556	114.953
	114.874	108.949	98.3716
	100.186	101.438	104.72
	108.174	113.485	112.782
	108.168	110.235	124.505
	107.301	108.885	108.486
	110.23	120.078	105.041
	107.867	109.467	91.0126
	121.708	120.989	100.083
	112.629	96.5288	84.4934
	111.323	108.076	110.856
	100.124	105.814	93.526
	103.188	110.897	68.7924
	111.128	104.721	116.924
	111.128	111.173	91.3718
	110.322	97.8831	100.25
	104.266	109.8	109.983
	109.936	114.978	100.088
	107.666	108.174	117.057
	115.965	115.459	101.403
	111.48	107.143	96.1661
	103.233	104.288	100.357
	111.128	115.973	93.0861
	99.5674	97.8098	102.558
	99.1886	130.075	119.011
	118.712	116.567	97.9372
	107.551	117.049	113.579
	107.644	94.7299	88.0446
	0	120.848	115.518
	0	0	112.482
	0	0	101.282
Velocity_small toe_data	0.248302	0.315683	0.308876
	0.382486	0.270254	0.277218
	0.342992	0.336043	0.227005
	0.369065	0.393304	0.205437
	0.329462	0.290363	0.173895
	0.362188	0.283572	0.304265
	0.342149	0.25891	0.135775
	0.371658	0.260716	0.203795
	0.242825	0.221578	0.205718
	0.271067	0.315429	0.239602
	0.397662	0.311846	0.21824
	0.383092	0.281252	0.340623
	0.300532	0.250445	0.249423
	0.370288	0.338343	0.263813
	0.257729	0.324394	0.160022
	0.283986	0.31358	0.231123
	0.274406	0.325834	0.179954
	0.342236	0.267487	0.127655
	0.404813	0.368444	0.18629
	0.357657	0.285819	0.206487
	0.334713	0.359264	0.267149
	0.39016	0.306645	0.248906
	0.273892	0.403491	0.121416
	0.397596	0.274234	0.147157
	0.374241	0.335188	0.189327
	0.373525	0.332235	0.233062
	0.271058	0.358928	0.287773
	0.333658	0.358933	0.183328
	0.285004	0.298848	0.356253
	0.307631	0.388216	0.192938
	0.351134	0.0609419	0.189653
	0.334206	0.304986	0.231347
	0.320756	0.290408	0.11129
	0.273019	0.239811	0.127956
	0.301422	0.318117	0.301721
	0.338585	0.412402	0.230367
	0.387076	0.346228	0.25433
	0.33364	0.316248	0.17208
	0	0.329443	0.276231
	0	0	0.256481
	0	0	0.155054
Velocity_wrist_data	0.133834	0.171453	0.158482
	0.206647	0.141668	0.150155
	0.177842	0.168051	0.11864
	0.21114	0.201037	0.110068
	0.169174	0.158751	0.0919121
	0.189935	0.152231	0.156981
	0.175565	0.136751	0.0710374
	0.202984	0.141129	0.110576
	0.124438	0.12017	0.112028
	0.14063	0.178531	0.123192
	0.223322	0.154326	0.124396
	0.201983	0.147071	0.185569
	0.165291	0.13423	0.131587
	0.204678	0.171696	0.138012
	0.140195	0.183315	0.0903119
	0.149482	0.184703	0.125244
	0.145158	0.176105	0.104789
	0.175866	0.140576	0.065832
	0.219847	0.194115	0.101498
	0.192493	0.150632	0.107918
	0.181018	0.182021	0.146394
	0.204568	0.161483	0.129308
	0.145511	0.221214	0.0631422
	0.222618	0.146436	0.0747479
	0.189103	0.197441	0.103946
	0.203028	0.18054	0.119624
	0.137091	0.199051	0.16034
	0.176948	0.187825	0.103916
	0.147644	0.11941	0.185588
	0.162772	0.198674	0.103232
	0.182406	0.042231	0.106312
	0.166938	0.16353	0.127216
	0.179307	0.178131	0.0570045
	0.143388	0.129016	0.0672729
	0.164455	0.171699	0.163436
	0.174714	0.217778	0.122147
	0.208005	0.191066	0.13676
	0.182515	0.170852	0.0931684
	0	0.178244	0.135965
	0	0	0.128261
	0	0	0.0824184
Velocity_ankle_data	0.252519	0.318838	0.303228
	0.384193	0.274868	0.27118
	0.343399	0.296316	0.221017
	0.376552	0.397639	0.20771
	0.32551	0.291044	0.170519
	0.367447	0.285096	0.258963
	0.342646	0.264164	0.134509
	0.37757	0.257818	0.204089
	0.241453	0.214198	0.200276
	0.269973	0.308229	0.241026
	0.402196	0.311506	0.220216
	0.38708	0.28892	0.351034
	0.30686	0.241692	0.246655
	0.367045	0.333432	0.259851
	0.263245	0.320108	0.159615
	0.283756	0.325878	0.230803
	0.280495	0.321088	0.185235
	0.330189	0.261022	0.127936
	0.405362	0.368773	0.186199
	0.363744	0.282208	0.207216
	0.341079	0.343125	0.269327
	0.399427	0.306867	0.24974
	0.276528	0.393776	0.121859
	0.395165	0.276546	0.14206
	0.375279	0.330747	0.185388
	0.380294	0.329651	0.235494
	0.266283	0.360448	0.285628
	0.328297	0.355228	0.17945
	0.277783	0.299456	0.352758
	0.310473	0.392003	0.191786
	0.353731	0.0519642	0.186547
	0.295153	0.303768	0.230371
	0.322901	0.260306	0.113902
	0.281535	0.237923	0.114611
	0.304181	0.316976	0.305901
	0.336079	0.404462	0.226545
	0.396343	0.345274	0.25384
	0.336509	0.315051	0.16716
	0	0.332183	0.277966
	0	0	0.250643
	0	0	0.158675
Mean Angle_neck_data	156.74	136.123	145.833
	134.873	145.404	147.274
	157.152	151.095	139.199
	147.236	140.908	144.219
	149.803	152.905	147.347
	144.438	148.486	145.524
	158.754	153.055	145.827
	146.645	151.664	145.363
	145.276	147.202	145.943
	147.929	147.711	150.873
	140.025	145.184	142.11
	145.325	151.113	140.627
	143.809	150.637	152.639
	154.409	155.464	153.74
	149.248	143.62	146.701
	135.809	147.836	150.892
	147.377	154.51	151.892
	148.416	132.716	149.369
	156.202	151.441	154.53
	157.03	140.354	137.946
	163.215	146.889	143.93
	148.816	151.322	141.086
	139.028	148.516	138.173
	160.124	145.575	147.103
	148.362	153.572	141.335
	159.785	156.77	130.963
	152.952	154.484	139.37
	157.882	150.874	135.226
	147.394	152.582	149.184
	153.957	139.735	156.776
	152.932	145.603	143.055
	140.811	137.135	143.104
	153.712	142.279	148.988
	144.089	131.377	146.05
	153.519	143.232	138.922
	156.73	134.936	150.444
	157.693	154.493	133.514
	148.129	141.772	147.986
	0	158.702	148.027
	0	0	156.429
	0	0	139.944
Acceleration_elbow_data	0.00169843	0.00139846	0.00117488
	0.00349728	0.00218994	0.00250763
	0.00285623	0.00158348	0.00112165
	0.00278985	0.00285844	0.0018679
	0.00279111	0.00216037	0.000987294
	0.00189412	0.00240294	0.00185693
	0.00484809	0.00220272	0.00185612
	0.00217764	0.00169925	0.00156524
	0.00144814	0.00315021	0.00102636
	0.000432226	0.00222859	0.00160238
	0.00345654	0.00186243	0.00110591
	0.00344193	0.00139871	0.00334686
	0.00222352	0.00298507	0.00166241
	0.00349623	0.00173554	0.00241121
	0.00218921	0.00250557	0.00137744
	0.00136821	0.00204633	0.00116423
	0.0021571	0.00207476	0.00246221
	0.00652234	0.00123751	0.00100165
	0.00221998	0.00215805	0.00094344
	0.00360782	0.00321053	0.00136254
	0.00240078	0.00318619	0.00156759
	0.00400899	0.00155933	0.00155211
	0.00241051	0.0030368	0.00132215
	0.00445631	0.000946304	0.000951162
	0.00197713	0.00295119	0.00126118
	0.00419512	0.00347413	0.00154682
	0.00259265	0.00665367	0.00240104
	0.00317036	0.00221537	0.00200802
	0.0031876	0.00223298	0.00247298
	0.00271318	0.00197641	0.00149907
	0.00267781	0.00246215	0.00612324
	0.00486485	0.00383699	0.000728622
	0.00148059	0.0041754	0.000811716
	0.00232027	0.002382	0.00147145
	0.00311224	0.0024696	0.00250398
	0.00204154	0.00330755	0.000737194
	0.00379109	0.00127336	0.00262761
	0.00174771	0.00196785	0.0012683
	0	0.00329284	0.00223807
	0	0	0.000777763
	0	0	0.00133453
Std Dev Angle_hip_data	1.135	1.51564	1.26637
	1.35029	1.1256	1.49743
	1.69084	4.03733	1.58702
	1.59854	1.4345	0.988088
	1.52379	1.4584	1.30098
	1.54454	1.50365	1.50955
	1.44247	1.39891	0.990281
	1.4828	1.30394	1.17444
	1.22149	1.33031	1.28042
	1.34935	1.57837	1.30731
	1.30929	1.32599	1.17897
	1.58708	1.19774	1.47569
	1.25549	1.3547	1.27098
	1.30088	1.30897	1.23157
	1.18677	1.49745	0.937486
	1.16997	1.27961	1.36823
	1.28845	1.82129	1.22417
	1.52031	1.2606	1.12114
	1.61807	1.68831	1.22713
	1.42736	1.27269	1.15492
	1.27799	2.85755	1.35539
	1.52135	4.34139	1.42008
	1.26215	1.29319	1.0629
	1.91548	1.56698	1.37181
	1.31612	1.67068	1.23504
	1.70246	1.63035	1.42964
	1.02518	6.19756	1.6985
	1.60208	1.28065	1.52671
	1.63902	1.20701	2.02226
	1.42273	1.22878	1.2049
	1.34189	1.48587	1.64372
	2.05875	1.38157	1.0895
	1.60937	8.55034	1.24919
	1.36717	1.61753	3.30913
	1.23685	2.02672	2.89836
	1.35774	1.62858	0.97059
	1.51403	1.58222	1.24196
	1.65673	1.57838	1.25119
	0	1.56124	1.22023
	0	0	1.40467
	0	0	1.03906
Acceleration_heel_data	0.00669028	0.00882771	0.0134918
	0.012536	0.0133058	0.0113487
	0.0131136	0.00980892	0.00778166
	0.0106901	0.0113484	0.00910243
	0.00800219	0.00685408	0.0067915
	0.00561399	0.00539773	0.0187179
	0.0118441	0.0113194	0.00370965
	0.0115911	0.00751146	0.0117002
	0.00701315	0.00415957	0.00816731
	0.00578148	0.00757859	0.00299601
	0.00749368	0.0154888	0.00443467
	0.0157067	0.0112027	0.0139462
	0.00666923	0.00795042	0.0112048
	0.0116882	0.00702557	0.00826159
	0.00710802	0.011693	0.00572911
	0.00610657	0.0111667	0.0102394
	0.0154622	0.00618327	0.00712278
	0.00775495	0.0139275	0.00809329
	0.0103915	0.0121364	0.00270791
	0.0225765	0.00523001	0.00580421
	0.00683946	0.0155324	0.00611674
	0.0103061	0.00700381	0.00580418
	0.0084152	0.00956516	0.00684531
	0.0081095	0.0161567	0.00321436
	0.0098348	0.00811191	0.00537024
	0.00757293	0.0056302	0.010377
	0.00404886	0.0184539	0.00737825
	0.0106057	0.0174283	0.00959637
	0.00506459	0.00845129	0.0088271
	0.0126959	0.0127308	0.00769493
	0.0100254	0.00562761	0.0149964
	0.00989585	0.00548501	0.00637823
	0.00863629	0.013534	0.00332173
	0.0100888	0.0102925	0.00658116
	0.00441363	0.0105104	0.0137815
	0.0126052	0.00651792	0.00453637
	0.0122922	0.00598979	0.00761477
	0.00598495	0.00941403	0.00538
	0	0.0127129	0.0066673
	0	0	0.0149506
	0	0	0.00849273
Acceleration_ankle_data	0.00616376	0.00580262	0.0123589
	0.0105465	0.00808935	0.0060885
	0.0137433	0.0108784	0.00665884
	0.0189583	0.0108279	0.00998097
	0.00922575	0.00659131	0.00696288
	0.00435561	0.00553965	0.0146375
	0.0133495	0.0194095	0.00319197
	0.0101032	0.00633466	0.0105894
	0.00659467	0.00387128	0.0148394
	0.00560752	0.00632468	0.00331074
	0.00662083	0.0139606	0.00449281
	0.0141487	0.0111039	0.0116257
	0.00545925	0.00639955	0.00989226
	0.0116982	0.00626164	0.00857497
	0.0065888	0.0109333	0.00973115
	0.00640886	0.0104152	0.00928362
	0.0133918	0.00586005	0.00610303
	0.00682009	0.010506	0.00561349
	0.00984361	0.00618481	0.00257444
	0.0187874	0.00562403	0.00982416
	0.00684271	0.0161586	0.00534899
	0.00842917	0.00775919	0.00487353
	0.00846691	0.00693169	0.0058692
	0.00761982	0.00833792	0.0127404
	0.00974516	0.00565919	0.00524017
	0.00950584	0.00601351	0.00770231
	0.00383553	0.0182241	0.00702593
	0.00883125	0.01565	0.00655758
	0.00558235	0.0128504	0.00817184
	0.012522	0.013056	0.00799057
	0.00692386	0.00577399	0.0138014
	0.00882646	0.00487404	0.00510218
	0.00824729	0.0150132	0.00366106
	0.0089357	0.00880121	0.00973021
	0.00363425	0.0116149	0.0156202
	0.0119405	0.00770582	0.00436107
	0.01208	0.00478262	0.0127181
	0.00626485	0.00952412	0.00487576
	0	0.0102511	0.00793242
	0	0	0.00855265
	0	0	0.00632886
Acceleration_small toe_data	0.00781975	0.00819754	0.0140303
	0.016452	0.0123163	0.0124727
	0.0135746	0.0102599	0.0118399
	0.00457838	0.0095085	0.00647419
	0.0105132	0.00582236	0.00788965
	0.00726941	0.00683744	0.023763
	0.0137325	0.0100425	0.00483122
	0.00986324	0.0101186	0.00572517
	0.00935942	0.003725	0.00614214
	0.00593227	0.0101957	0.00857124
	0.0070248	0.0150986	0.00685229
	0.0132448	0.00937841	0.00837976
	0.00423554	0.00570242	0.0112496
	0.0135317	0.00767105	0.0146536
	0.0076786	0.00911742	0.0049845
	0.00830986	0.01462	0.00798022
	0.0150365	0.00315314	0.00536063
	0.00394066	0.00635577	0.00797047
	0.00906467	0.0121002	0.00188944
	0.00904222	0.0103286	0.00514904
	0.0121044	0.0210294	0.00703669
	0.00713457	0.00904492	0.00473632
	0.00871529	0.00705759	0.00702219
	0.0105407	0.0155215	0.00346594
	0.0133257	0.0147314	0.00543636
	0.011023	0.00628055	0.0112399
	0.00558352	0.0169924	0.00926621
	0.00878469	0.0208699	0.00700192
	0.00870964	0.00642093	0.00980319
	0.012101	0.0114174	0.00427256
	0.013982	0.00456681	0.0127784
	0.0127897	0.00764496	0.00252831
	0.00810805	0.00953818	0.00262221
	0.0084523	0.00927078	0.00650966
	0.00507061	0.0090233	0.0161754
	0.0117465	0.00794812	0.00725894
	0.0129575	0.007818	0.00911
	0.00794354	0.0103138	0.00660225
	0	0.0080894	0.00806761
	0	0	0.0160535
	0	0	0.00816611
Acceleration_shoulder_data	0.00199526	0.00105438	0.00154118
	0.00434798	0.00150637	0.00158735
	0.00302044	0.0138614	0.00101925
	0.00171376	0.00214533	0.00197855
	0.00142644	0.00126501	0.000934133
	0.0017806	0.00124258	0.00146742
	0.00237523	0.00178453	0.000890325
	0.00253307	0.00177637	0.00140117
	0.00133379	0.00111789	0.000812553
	0.000593361	0.00166429	0.00174593
	0.00265282	0.00149446	0.00169419
	0.00186121	0.00146569	0.00476457
	0.0029188	0.00239059	0.00149696
	0.00304919	0.00152429	0.00145902
	0.00192535	0.00234422	0.000865327
	0.00152088	0.00158092	0.0013167
	0.00265518	0.00175214	0.00172707
	0.00262292	0.00120479	0.00129363
	0.00206874	0.00153983	0.00101409
	0.00277972	0.00264861	0.00179993
	0.00201789	0.00170598	0.001069
	0.0031961	0.00185914	0.00178594
	0.00212878	0.00276033	0.00107206
	0.00284733	0.00150635	0.00074439
	0.0016576	0.00378659	0.000942984
	0.003252	0.00331403	0.00139888
	0.00129016	0.00450049	0.0015394
	0.00199305	0.00188202	0.00193883
	0.00206068	0.00505806	0.00207001
	0.00244014	0.000588651	0.00128475
	0.00251223	0.00357163	0.00384207
	0.00762435	0.0022442	0.000937618
	0.0015634	0.00562749	0.000671999
	0.00202618	0.0017409	0.00303714
	0.00149543	0.00189215	0.002899
	0.00133522	0.00198455	0.000894881
	0.00414767	0.00215864	0.00302916
	0.00147955	0.00248323	0.000878079
	0	0.00222677	0.00112912
	0	0	0.00139953
	0	0	0.000975239
Acceleration_big toe_data	0.00800135	0.0114904	0.0129362
	0.0157998	0.0105072	0.0115442
	0.0136463	0.011473	0.0108112
	0.00420197	0.00935832	0.00660523
	0.0113661	0.00372975	0.0126082
	0.00795662	0.00637889	0.0186014
	0.0140881	0.0093814	0.00445958
	0.0095918	0.00844803	0.00568591
	0.00887426	0.0042416	0.00663476
	0.00572074	0.0104425	0.00512079
	0.00818322	0.014493	0.00728965
	0.0190651	0.00876047	0.00752859
	0.00460707	0.00755674	0.0103964
	0.0121758	0.00778659	0.0127393
	0.00685001	0.00901002	0.00392672
	0.00837148	0.0137414	0.00872612
	0.013661	0.00320509	0.0050447
	0.00490908	0.00542257	0.00712519
	0.00888664	0.0112933	0.00169034
	0.00905891	0.0103605	0.00402595
	0.0139622	0.0155796	0.00497399
	0.00831745	0.00907208	0.00438752
	0.00932025	0.00769615	0.00381494
	0.0118564	0.0136509	0.00285393
	0.0132895	0.0227828	0.00470812
	0.0100292	0.00700251	0.0100224
	0.00761763	0.0135275	0.00880548
	0.0109566	0.0249642	0.00552429
	0.00893891	0.00684169	0.00943298
	0.0120796	0.0108667	0.00498148
	0.0128719	0.00414578	0.0122909
	0.0127209	0.00785159	0.00328087
	0.00843271	0.00915773	0.00470752
	0.00943914	0.00730856	0.00674491
	0.00524716	0.00901326	0.0150378
	0.0110853	0.00746528	0.00676918
	0.0114993	0.00816039	0.0103361
	0.00935037	0.0147137	0.00562024
	0	0.0104135	0.00732913
	0	0	0.0200969
	0	0	0.00689313
Std Dev Angle_knee_data	11.4154	10.7543	10.7174
	12.5914	10.2197	8.63271
	11.3791	14.5871	7.50169
	12.4431	13.4019	7.00203
	12.771	11.2945	9.12292
	10.3049	10.8547	16.0405
	12.0402	10.421	7.3516
	11.5904	10.4665	9.1042
	10.4248	9.57045	8.83939
	11.1391	10.4676	11.2291
	12.9815	12.3683	9.43868
	12.7577	12.0369	12.4221
	9.66931	11.1569	8.06262
	11.6094	10.0098	11.001
	10.2391	11.9821	5.19814
	10.4649	13.1413	10.0799
	12.0195	11.1123	7.97792
	12.0492	10.7197	7.63406
	11.6202	9.69225	6.71997
	11.2764	11.2913	9.51694
	10.7353	14.7687	8.84654
	11.3179	19.2089	9.90109
	11.0771	11.8278	6.72588
	10.8648	11.7551	8.22154
	13.6039	10.1911	9.63623
	11.0186	10.7903	9.83988
	10.7698	21.1412	10.3185
	11.9047	10.68	8.21199
	10.259	9.86331	13.2645
	10.7526	12.007	6.64651
	11.7974	4.72655	9.37582
	23.5882	12.0179	10.0891
	10.2885	22.1991	6.34607
	8.70947	9.44936	15.521
	11.9495	10.9317	16.2822
	11.0585	14.1846	8.41794
	12.9914	9.31966	8.33744
	12.5878	11.8382	7.4555
	0	10.1887	7.54199
	0	0	9.55243
	0	0	7.85107
Mean Angle_elbow_data	167.824	166.589	161.541
	165.3	163.591	167.949
	170.03	165.948	165.197
	166.447	166.598	151.937
	166.922	167.038	169.611
	166.97	160.722	151.184
	170.139	161.249	161.341
	168.552	171.552	167.698
	164.741	167.718	163.868
	169.294	165.867	168.754
	164.844	168.879	169.004
	165.891	170.589	166.351
	154.989	169.536	155.885
	167.45	169.715	165.847
	170	162.801	163.195
	161.326	164.153	172.35
	169.454	164.942	161.218
	164.549	169.418	164.988
	162.103	165.221	165.95
	165.39	161.507	161.871
	170.788	167.377	162.138
	162.697	166.975	158.526
	166.449	161.624	162.668
	167.878	166.382	164.337
	168.25	162.52	164.137
	169.882	164.702	153.664
	167.423	163.459	160.156
	165.258	166.843	165.713
	167.301	161.833	167.225
	166.548	165.18	168.925
	168.254	163.957	170.237
	166.59	168.995	163.441
	163.862	157.866	167.703
	164.565	169.213	169.167
	167.721	159.806	164.368
	170.343	159.912	163.093
	168.298	171.221	153.272
	169.068	162.008	164.708
	0	170.047	164.075
	0	0	159.192
	0	0	166.015
Velocity_head_data	0.250969	0.329064	0.319595
	0.391503	0.266508	0.273221
	0.331683	0.305663	0.214728
	0.372393	0.389674	0.210078
	0.322858	0.295021	0.16648
	0.352935	0.28832	0.307258
	0.327243	0.262434	0.133578
	0.374739	0.242982	0.201104
	0.236129	0.217383	0.208692
	0.267104	0.317187	0.225921
	0.394404	0.310576	0.22172
	0.370231	0.270927	0.353719
	0.311685	0.243597	0.250201
	0.354965	0.31552	0.256896
	0.264132	0.330415	0.167785
	0.283209	0.347362	0.230737
	0.272436	0.312959	0.204958
	0.321724	0.268095	0.121118
	0.392038	0.361788	0.189011
	0.34513	0.285243	0.205562
	0.330349	0.2894	0.27279
	0.395625	0.267548	0.245168
	0.26315	0.381967	0.124882
	0.387054	0.265065	0.143733
	0.376992	0.322153	0.197584
	0.368698	0.331313	0.223678
	0.261035	0.262676	0.306076
	0.32975	0.351268	0.183134
	0.270085	0.282419	0.35669
	0.294587	0.389136	0.18941
	0.343709	0.0728068	0.189646
	0.271815	0.307279	0.230002
	0.312367	0.270701	0.114189
	0.267855	0.237684	0.13347
	0.301386	0.327226	0.312008
	0.32201	0.396896	0.222932
	0.379912	0.348011	0.261296
	0.334462	0.313384	0.171485
	0	0.332713	0.260799
	0	0	0.247098
	0	0	0.151505
Mean Angle_knee_data	169.67	169.886	165.991
	165.83	167.194	168.206
	166.209	163.165	170.204
	165.16	165.42	165.981
	166.267	166.499	167.299
	171.077	168.856	164.43
	168.537	163.958	168.816
	169.298	169.904	171.17
	170.231	170.068	168.99
	170.041	166.133	167.169
	167.727	167.261	164.502
	165.525	167.311	161.192
	170.819	167.561	171.583
	169.467	168.593	169.278
	168.975	168.893	173.689
	169.35	167.029	163.88
	168.756	166.826	170.815
	169.253	164.997	169.027
	167.95	168.693	171.537
	166.373	167.96	165.728
	168.464	166.859	170.436
	168.395	163.887	168.239
	168.206	166.849	170.874
	167.962	169.896	169.776
	166.366	164.38	165.65
	168.011	168.879	169.582
	168.848	163.635	165.395
	168.267	165.892	169.698
	168.489	166.67	156.616
	166.157	167.633	172.345
	163.715	174.423	169.934
	162.413	165.512	166.87
	170.003	159.804	172.042
	170.849	165.114	161.734
	166.826	167.735	163.917
	166.226	166.337	171.975
	166.968	170.739	169.995
	167.612	166.656	171.058
	0	166.752	166.283
	0	0	167.516
	0	0	169.998
Velocity_hip_data	0.25102	0.325915	0.313729
	0.383747	0.26939	0.268669
	0.333898	0.350789	0.211523
	0.369146	0.388534	0.204861
	0.323637	0.287838	0.166573
	0.355743	0.284113	0.325299
	0.335321	0.259173	0.133432
	0.381207	0.241646	0.202664
	0.241342	0.220817	0.206261
	0.265122	0.310584	0.23159
	0.401639	0.307709	0.218057
	0.368692	0.271003	0.348725
	0.309049	0.237151	0.24505
	0.36498	0.311588	0.253671
	0.270925	0.323023	0.167456
	0.281174	0.346885	0.225958
	0.283707	0.318263	0.198861
	0.33354	0.262199	0.121032
	0.401865	0.361116	0.191193
	0.353809	0.279698	0.203556
	0.332067	0.313702	0.273095
	0.401269	0.289745	0.24795
	0.264729	0.376975	0.124258
	0.390172	0.269393	0.144232
	0.369042	0.312055	0.194674
	0.374194	0.335514	0.227281
	0.265464	0.289375	0.296811
	0.32935	0.351836	0.182178
	0.271039	0.266865	0.359198
	0.295519	0.390189	0.1855
	0.348316	0.0609149	0.184829
	0.291521	0.304532	0.226785
	0.320728	0.29288	0.111787
	0.265538	0.241211	0.113998
	0.310144	0.31731	0.330052
	0.325301	0.395364	0.22537
	0.391079	0.340558	0.25065
	0.340023	0.30725	0.165882
	0	0.330194	0.272482
	0	0	0.248425
	0	0	0.154095

## Sheet: Fig4B
Contribution (all scores)	Contribution (score 0)	Contribution (score 1)	Contribution (score 2)	Joint
0.523057	0.223728	0.975856	0.0528299	head
0	0.0653143	0	0.0319183	neck
0.316985	0.220299	0.604194	0.0310808	right shoulder
0.273623	0.556055	0.249388	0.133983	right elbow
0.512373	0.997116	0.471025	0.384166	right wrist
0.596871	0.363726	0.68692	0.425347	left shoulder
0.608045	0.624267	0.388613	0.649012	left elbow
0.972128	0.994146	0.667838	1	left wrist
0.613407	0.302165	0.874957	0.472961	right hip
0.754984	0.47946	0.907013	0.717212	right knee
0.660968	0.9195	0.429684	0.46049	right ankle
0.513509	0.0857141	0.764021	0.490536	left hip
0.644779	0.126635	0.767329	0.847598	left knee
0.559473	0.571261	0.456538	0.582588	left ankle
0.941008	0.471168	0.966835	0.995975	left big toe
0.941897	0.469466	0.967072	0.996781	left small toe
0.939403	0.460766	0.965745	0.99988	left heel
0.996646	0.972014	0.945132	0.869737	right big toe
0.996808	0.972481	0.944485	0.866545	right small toe
0.997154	0.96274	0.948873	0.876112	right heel

## Sheet: Fig4C
Motion marker	UPDRS 0	UPDRS 1	UPDRS 2
Arm Swing Amplitude	0.103956	0.0856128	0.123608
	0.174192	0.102602	0.115009
	0.21876	0.151943	0.123997
	0.218946	0.139438	0.0609686
	0.179882	0.0813378	0.141708
	0.191461	0.11539	0.0492628
	0.177105	0.149356	0.0915444
	0.138849	0.152885	0.109372
	0.120286	0.148574	0.0613406
	0.106428	0.109849	0.0867469
	0.180359	0.126631	0.0904937
	0.172157	0.106088	0.235577
	0.119265	0.123049	0.0596915
	0.203617	0.126122	0.103585
	0.137482	0.144405	0.0943094
	0.112786	0.148751	0.0559901
	0.122336	0.0882958	0.145251
	0.164524	0.0505302	0.0679853
	0.256249	0.136842	0.0891655
	0.203793	0.125832	0.0606599
	0.159262	0.178537	0.122083
	0.159339	0.152514	0.0726561
	0.139416	0.221682	0.0701091
	0.22142	0.120318	0.0720664
	0.220554	0.222054	0.0814973
	0.170249	0.116946	0.112779
	0.138461	0.198715	0.144495
	0.180451	0.193158	0.118154
	0.142676	0.227239	0.117256
	0.120386	0.176869	0.0789538
	0.17532	0.141499	0.117843
	0.195379	0.138684	0.111365
	0.177748	0.106731	0.0763115
	0.153776	0.114125	0.0883148
	0.16544	0.109684	0.0991922
	0.14154	0.183676	0.0830168
	0.238434	0.138901	0.06622
	0.168251	0.156698	0.0685378
	0	0.0996024	0.11679
	0	0	0.121713
	0	0	0.0904224
Gait Speed	0.250969	0.329064	0.319595
	0.391503	0.266508	0.273221
	0.331683	0.305663	0.214728
	0.372393	0.389674	0.210078
	0.322858	0.295021	0.16648
	0.352935	0.28832	0.307258
	0.327243	0.262434	0.133578
	0.374739	0.242982	0.201104
	0.236129	0.217383	0.208692
	0.267104	0.317187	0.225921
	0.394404	0.310576	0.22172
	0.370231	0.270927	0.353719
	0.311685	0.243597	0.250201
	0.354965	0.31552	0.256896
	0.264132	0.330415	0.167785
	0.283209	0.347362	0.230737
	0.272436	0.312959	0.204958
	0.321724	0.268095	0.121118
	0.392038	0.361788	0.189011
	0.34513	0.285243	0.205562
	0.330349	0.2894	0.27279
	0.395625	0.267548	0.245168
	0.26315	0.381967	0.124882
	0.387054	0.265065	0.143733
	0.376992	0.322153	0.197584
	0.368698	0.331313	0.223678
	0.261035	0.262676	0.306076
	0.32975	0.351268	0.183134
	0.270085	0.282419	0.35669
	0.294587	0.389136	0.18941
	0.343709	0.0728068	0.189646
	0.271815	0.307279	0.230002
	0.312367	0.270701	0.114189
	0.267855	0.237684	0.13347
	0.301386	0.327226	0.312008
	0.32201	0.396896	0.222932
	0.379912	0.348011	0.261296
	0.334462	0.313384	0.171485
	0	0.332713	0.260799
	0	0	0.247098
	0	0	0.151505
Step Length	0.32892	0.385501	0.353242
	0.401487	0.300867	0.311478
	0.379309	0.403492	0.285607
	0.377204	0.414095	0.257637
	0.370561	0.349403	0.24629
	0.410507	0.392837	0.393993
	0.367973	0.2911	0.204197
	0.424816	0.331906	0.28556
	0.374415	0.30703	0.287466
	0.362254	0.358302	0.309645
	0.461303	0.336828	0.269497
	0.446242	0.301669	0.453525
	0.38582	0.321278	0.307164
	0.440293	0.332444	0.267498
	0.333377	0.364036	0.247849
	0.355658	0.400995	0.252134
	0.341349	0.348413	0.302151
	0.404468	0.30395	0.211339
	0.41495	0.39371	0.272272
	0.391888	0.386371	0.288261
	0.379049	0.442137	0.301004
	0.503269	0.440031	0.368267
	0.355499	0.43169	0.296963
	0.428219	0.316191	0.259186
	0.4175	0.396903	0.312364
	0.441871	0.429465	0.319997
	0.326853	0.45203	0.317013
	0.391567	0.385767	0.273262
	0.362639	0.333929	0.395387
	0.357686	0.419246	0.283162
	0.423708	0.185581	0.321292
	0.541538	0.401798	0.289698
	0.375881	0.40579	0.197341
	0.344466	0.295718	0.479831
	0.400834	0.340848	0.374901
	0.351245	0.447189	0.32093
	0.440597	0.392123	0.306135
	0.399153	0.441117	0.274353
	0	0.343831	0.314515
	0	0	0.327728
	0	0	0.221428

## Sheet: Fig5
Subject	Step length	Arm swing amplitude	Velocity	Combined feature	Model	Non-Expert	Expert 2	Expert 1	Expert 3
2	No Change	No Change	No Change	No Change	Improvement	Improvement	Improvement	Improvement	Improvement
9	No Change	No Change	No Change	No Change	Deterioration	Improvement	Deterioration	Deterioration	Deterioration
20	Improvement	Improvement	Improvement	Improvement	Improvement	Improvement	Improvement	No Change	Deterioration
23	No Change	No Change	No Change	No Change	No Change	Improvement	No Change	No Change	Improvement
28	No Change	No Change	Improvement	Improvement	Improvement	Improvement	Improvement	Deterioration	Improvement
31	No Change	No Change	No Change	No Change	Deterioration	Improvement	Improvement	No Change	Improvement
33	No Change	Improvement	No Change	Improvement	Improvement	Improvement	Improvement	Improvement	Improvement
36	No Change	Improvement	Improvement	Improvement	Improvement	Improvement	No Change	Deterioration	Deterioration
44	No Change	No Change	No Change	No Change	Improvement	Improvement	Improvement	No Change	Improvement
47	Improvement	No Change	Improvement	Improvement	Improvement	Improvement	Improvement	Improvement	Improvement
55	Improvement	Improvement	Deterioration	Improvement	Improvement	Improvement	No Change	Improvement	Improvement
58	Improvement	Improvement	Improvement	Improvement	Improvement	Improvement	Improvement	Improvement	Deterioration
59	No Change	No Change	No Change	No Change	Deterioration	Deterioration	No Change	Deterioration	Deterioration
61	Deterioration	No Change	Deterioration	Deterioration	Deterioration	Improvement	Deterioration	Deterioration	Deterioration
62	No Change	No Change	No Change	No Change	Deterioration	Improvement	Improvement	Improvement	Improvement
70	No Change	No Change	No Change	No Change	Deterioration	Improvement	No Change	Deterioration	Deterioration
78	No Change	Improvement	Deterioration	No Change	Deterioration	Improvement	Improvement	No Change	Improvement
91	No Change	No Change	No Change	No Change	No Change	Improvement	Improvement	Improvement	Improvement
102	No Change	No Change	No Change	No Change	Improvement	Improvement	No Change	Improvement	Improvement

## Sheet: Fig6
Subject	Features	Significance level	p value	Off medication	On medication	Change	Normal distribution
36	Arm Swing Amplitude (right wrist)	ns	0.29673	0.214581	0.228624	Increase	norm
36	Arm Swing Amplitude (left wrist)	*	0.0214863	0.176178	0.216929	Increase	norm
36	Step Length	ns	0.87278	0.541538	0.496909	Decrease	un norm
36	Cadence	ns	0.108074	103.233	106.351	Increase	un norm
36	Velocity (head)	*	0.0208895	0.271815	0.426431	Increase	norm
36	Velocity (neck)	**	0.00890764	0.245581	0.425494	Increase	norm
36	Velocity (right shoulder)	ns	0.441788	0.148752	0.196366	Increase	un norm
36	Velocity (right elbow)	ns	0.441788	0.161726	0.199748	Increase	un norm
36	Velocity (right wrist)	ns	0.441788	0.169927	0.20121	Increase	un norm
36	Velocity (left shoulder)	ns	0.441788	0.191633	0.247326	Increase	un norm
36	Velocity (left elbow)	ns	0.441788	0.177893	0.251806	Increase	un norm
36	Velocity (left wrist)	ns	0.441788	0.16395	0.241396	Increase	un norm
36	Velocity (right hip)	**	0.00409778	0.277932	0.429947	Increase	norm
36	Velocity (right knee)	*	0.0132299	0.280737	0.417435	Increase	norm
36	Velocity (right ankle)	***	0.000701599	0.265833	0.409241	Increase	norm
36	Velocity (left hip)	**	0.00570858	0.30511	0.433426	Increase	norm
36	Velocity (left knee)	*	0.0249747	0.288474	0.453207	Increase	un norm
36	Velocity (left ankle)	ns	0.0781691	0.324474	0.444155	Increase	un norm
36	Velocity (left big toe)	ns	0.252524	0.378426	0.420994	Increase	norm
36	Velocity (left small toe)	ns	0.149751	0.369438	0.427299	Increase	norm
36	Velocity (left heel)	ns	0.0721895	0.361378	0.449768	Increase	norm
36	Velocity (right big toe)	***	6.03143e-05	0.295697	0.40294	Increase	norm
36	Velocity (right small toe)	***	0.000119458	0.298975	0.402312	Increase	norm
36	Velocity (right heel)	**	0.00100679	0.280617	0.409063	Increase	norm
36	Acceleration (head)	ns	0.149541	0.169096	0.00582741	Decrease	un norm
36	Acceleration (neck)	*	0.0104056	0.140396	0.00582353	Decrease	un norm
36	Acceleration (right shoulder)	ns	0.441788	0.00784983	0.00118793	Decrease	un norm
36	Acceleration (right elbow)	ns	0.669146	0.00422759	0.00169383	Decrease	un norm
36	Acceleration (right wrist)	ns	0.669146	0.00523366	0.00260573	Decrease	un norm
36	Acceleration (left shoulder)	ns	0.568643	0.00739887	0.00466849	Decrease	norm
36	Acceleration (left elbow)	ns	0.931892	0.0055021	0.00524968	Decrease	un norm
36	Acceleration (left wrist)	ns	0.441788	0.00747728	0.00153493	Decrease	un norm
36	Acceleration (right hip)	ns	0.149541	0.15683	0.0101244	Decrease	un norm
36	Acceleration (right knee)	ns	0.42334	0.0117804	0.00975172	Decrease	un norm
36	Acceleration (right ankle)	ns	0.262332	0.0059889	0.00873952	Increase	un norm
36	Acceleration (left hip)	ns	0.104591	0.030929	0.0117867	Decrease	norm
36	Acceleration (left knee)	ns	0.24124	0.00665479	0.0161656	Increase	norm
36	Acceleration (left ankle)	ns	0.231283	0.011664	0.0208062	Increase	norm
36	Acceleration (left big toe)	ns	0.744938	0.0212998	0.0178428	Decrease	norm
36	Acceleration (left small toe)	ns	0.942159	0.0207201	0.0199417	Decrease	norm
36	Acceleration (left heel)	ns	0.211657	0.013148	0.0252909	Increase	norm
36	Acceleration (right big toe)	**	0.00477404	0.00414194	0.0174398	Increase	norm
36	Acceleration (right small toe)	*	0.0145347	0.00485923	0.015734	Increase	norm
36	Acceleration (right heel)	ns	0.200185	0.00664369	0.0106949	Increase	un norm
36	Mean Angle (neck)	ns	0.651527	140.811	139.47	Decrease	norm
36	Mean Angle (left shoulder)	ns	0.848733	75.2557	75.3942	Increase	norm
36	Mean Angle (left elbow)	ns	0.769332	164.209	164.086	Decrease	norm
36	Mean Angle (right hip)	ns	0.78996	177.106	177.291	Increase	norm
36	Mean Angle (right knee)	ns	0.87278	163.13	168.705	Increase	un norm
36	Mean Angle (left hip)	ns	0.0614081	176.674	177.354	Increase	norm
36	Mean Angle (left knee)	ns	0.630954	161.697	167.332	Increase	un norm
36	Std Dev Angle (neck)	*	0.0163092	12.5674	4.6018	Decrease	un norm
36	Std Dev Angle (left shoulder)	ns	0.669002	14.6933	13.1122	Decrease	norm
36	Std Dev Angle (left elbow)	ns	0.69235	7.40483	7.66447	Increase	norm
36	Std Dev Angle (right hip)	ns	0.201411	2.24917	1.40066	Decrease	norm
36	Std Dev Angle (right knee)	ns	0.630954	24.1852	13.8097	Decrease	un norm
36	Std Dev Angle (left hip)	ns	0.183225	1.86832	1.47387	Decrease	norm
36	Std Dev Angle (left knee)	ns	0.87278	22.9911	14.9102	Decrease	un norm
44	Arm Swing Amplitude (right wrist)	ns	0.512691	0.18488	0.184108	Decrease	un norm
44	Arm Swing Amplitude (left wrist)	ns	0.393521	0.168858	0.178319	Increase	norm
44	Step Length	ns	0.938159	0.419246	0.417934	Decrease	norm
44	Cadence	ns	0.857977	115.459	114.953	Decrease	un norm
44	Velocity (head)	ns	0.371155	0.389136	0.377246	Decrease	norm
44	Velocity (neck)	ns	0.183615	0.390155	0.369874	Decrease	norm
44	Velocity (right shoulder)	ns	0.931892	0.200416	0.189611	Decrease	un norm
44	Velocity (right elbow)	ns	0.669146	0.20478	0.18848	Decrease	un norm
44	Velocity (right wrist)	ns	0.669146	0.203491	0.19144	Decrease	un norm
44	Velocity (left shoulder)	ns	0.669146	0.204528	0.193946	Decrease	un norm
44	Velocity (left elbow)	ns	0.931892	0.201386	0.196991	Decrease	un norm
44	Velocity (left wrist)	ns	0.669146	0.193857	0.212328	Increase	un norm
44	Velocity (right hip)	ns	0.229125	0.39201	0.373457	Decrease	norm
44	Velocity (right knee)	ns	0.521839	0.380672	0.386016	Increase	un norm
44	Velocity (right ankle)	ns	0.407645	0.386162	0.419383	Increase	norm
44	Velocity (left hip)	ns	0.27338	0.388369	0.368174	Decrease	norm
44	Velocity (left knee)	*	0.037373	0.408306	0.35685	Decrease	un norm
44	Velocity (left ankle)	ns	0.0750917	0.397844	0.333621	Decrease	norm
44	Velocity (left big toe)	ns	0.42334	0.389774	0.347234	Decrease	un norm
44	Velocity (left small toe)	ns	0.157063	0.392342	0.341503	Decrease	norm
44	Velocity (left heel)	ns	0.070574	0.397259	0.330074	Decrease	norm
44	Velocity (right big toe)	ns	0.42591	0.380686	0.414515	Increase	norm
44	Velocity (right small toe)	ns	0.451093	0.38409	0.416668	Increase	norm
44	Velocity (right heel)	ns	0.47057	0.388072	0.419746	Increase	norm
44	Acceleration (head)	*	0.0409144	0.00311337	0.00864515	Increase	norm
44	Acceleration (neck)	ns	0.0587892	0.00209742	0.00743855	Increase	norm
44	Acceleration (right shoulder)	ns	0.441788	0.000825303	0.00512369	Increase	un norm
44	Acceleration (right elbow)	ns	0.245412	0.00172591	0.00552229	Increase	norm
44	Acceleration (right wrist)	ns	0.797648	0.00161706	0.00772544	Increase	un norm
44	Acceleration (left shoulder)	ns	0.549674	0.000352	0.00273143	Increase	un norm
44	Acceleration (left elbow)	ns	0.797648	0.00222691	0.00283394	Increase	un norm
44	Acceleration (left wrist)	ns	0.499474	0.00436869	0.00768265	Increase	norm
44	Acceleration (right hip)	ns	0.233701	0.00499883	0.00841024	Increase	norm
44	Acceleration (right knee)	ns	0.721986	0.00706068	0.00876506	Increase	norm
44	Acceleration (right ankle)	ns	0.0958963	0.0123258	0.0337235	Increase	norm
44	Acceleration (left hip)	ns	0.273444	0.00458924	0.00826688	Increase	norm
44	Acceleration (left knee)	ns	0.336668	0.00364324	0.010249	Increase	un norm
44	Acceleration (left ankle)	*	0.0255697	0.0137861	0.00343408	Decrease	norm
44	Acceleration (left big toe)	ns	0.200185	0.0105005	0.0118299	Increase	un norm
44	Acceleration (left small toe)	*	0.0199546	0.0116609	0.00379178	Decrease	norm
44	Acceleration (left heel)	ns	0.0781691	0.0146497	0.0055798	Decrease	un norm
44	Acceleration (right big toe)	*	0.0407724	0.0112329	0.0345818	Increase	norm
44	Acceleration (right small toe)	*	0.0384787	0.011174	0.0377378	Increase	norm
44	Acceleration (right heel)	ns	0.0886681	0.010812	0.0389295	Increase	norm
44	Mean Angle (neck)	ns	0.239311	139.735	142.057	Increase	norm
44	Mean Angle (left shoulder)	*	0.0495346	91.844	87.2856	Decrease	un norm
44	Mean Angle (left elbow)	***	0.000930386	165.385	167.116	Increase	norm
44	Mean Angle (right hip)	ns	0.87278	177.84	177.869	Increase	un norm
44	Mean Angle (right knee)	ns	0.104808	168.117	165.998	Decrease	norm
44	Mean Angle (left hip)	ns	0.829624	178.409	178.467	Increase	norm
44	Mean Angle (left knee)	ns	0.49375	167.15	167.792	Increase	norm
44	Std Dev Angle (neck)	ns	0.262332	3.03735	4.02032	Increase	un norm
44	Std Dev Angle (left shoulder)	ns	0.611901	19.5534	20.0814	Increase	norm
44	Std Dev Angle (left elbow)	*	0.0192036	7.38375	9.34369	Increase	norm
44	Std Dev Angle (right hip)	ns	0.70238	1.31595	1.26365	Decrease	norm
44	Std Dev Angle (right knee)	ns	0.153041	11.9753	13.0843	Increase	norm
44	Std Dev Angle (left hip)	ns	0.637729	1.14161	1.05122	Decrease	norm
44	Std Dev Angle (left knee)	ns	0.748774	12.0387	12.109	Increase	un norm
91	Arm Swing Amplitude (right wrist)	ns	0.963641	0.0993893	0.0978126	Decrease	norm
91	Arm Swing Amplitude (left wrist)	ns	0.963818	0.183608	0.182438	Decrease	norm
91	Step Length	ns	0.779169	0.185581	0.193041	Increase	norm
91	Cadence	ns	0.769698	107.143	80.7093	Decrease	un norm
91	Velocity (head)	ns	0.806349	0.0728068	0.0776797	Increase	norm
91	Velocity (neck)	ns	0.845713	0.0632983	0.0675134	Increase	norm
91	Velocity (right shoulder)	ns	0.940758	0.0445216	0.0473042	Increase	norm
91	Velocity (right elbow)	ns	0.927124	0.0474875	0.0511544	Increase	norm
91	Velocity (right wrist)	ns	0.915025	0.0508666	0.0553395	Increase	norm
91	Velocity (left shoulder)	ns	0.669146	0.028635	0.0303941	Increase	un norm
91	Velocity (left elbow)	ns	0.797648	0.0280647	0.0294951	Increase	un norm
91	Velocity (left wrist)	ns	0.873976	0.0335953	0.0298162	Decrease	norm
91	Velocity (right hip)	ns	0.87842	0.0652659	0.0692527	Increase	norm
91	Velocity (right knee)	ns	0.62541	0.0530693	0.0652036	Increase	norm
91	Velocity (right ankle)	ns	0.575582	0.0357588	0.048885	Increase	norm
91	Velocity (left hip)	ns	0.787015	0.056564	0.0614695	Increase	norm
91	Velocity (left knee)	ns	0.857896	0.0689246	0.0639954	Decrease	norm
91	Velocity (left ankle)	ns	0.95301	0.0681696	0.0696434	Increase	norm
91	Velocity (left big toe)	ns	0.805324	0.0753426	0.0703413	Decrease	norm
91	Velocity (left small toe)	ns	0.853023	0.0711858	0.0670338	Decrease	norm
91	Velocity (left heel)	ns	0.923692	0.0603674	0.0624528	Increase	norm
91	Velocity (right big toe)	ns	0.521839	0.0500342	0.0627831	Increase	un norm
91	Velocity (right small toe)	ns	0.659843	0.050698	0.0629567	Increase	norm
91	Velocity (right heel)	ns	0.84892	0.046973	0.0518415	Increase	norm
91	Acceleration (head)	ns	0.706783	0.00621437	0.0055704	Decrease	norm
91	Acceleration (neck)	ns	0.56434	0.00625875	0.00511432	Decrease	norm
91	Acceleration (right shoulder)	ns	0.612141	0.00419801	0.00288705	Decrease	norm
91	Acceleration (right elbow)	ns	0.797648	0.00361076	0.00313458	Decrease	un norm
91	Acceleration (right wrist)	ns	0.931892	0.00703995	0.00550796	Decrease	un norm
91	Acceleration (left shoulder)	ns	0.628359	0.00294525	0.00201303	Decrease	norm
91	Acceleration (left elbow)	ns	0.931892	0.00131355	0.00159382	Increase	un norm
91	Acceleration (left wrist)	ns	0.669146	0.00150087	0.00454225	Increase	un norm
91	Acceleration (right hip)	ns	0.165185	0.00806241	0.00633687	Decrease	norm
91	Acceleration (right knee)	ns	0.390148	0.00712288	0.00517276	Decrease	norm
91	Acceleration (right ankle)	ns	0.68335	0.00453168	0.00346488	Decrease	norm
91	Acceleration (left hip)	ns	0.405892	0.00906446	0.00761012	Decrease	norm
91	Acceleration (left knee)	ns	0.150258	0.00779087	0.00535282	Decrease	norm
91	Acceleration (left ankle)	ns	0.200185	0.0070163	0.00595544	Decrease	un norm
91	Acceleration (left big toe)	ns	0.748774	0.00631692	0.00643864	Increase	un norm
91	Acceleration (left small toe)	ns	0.630954	0.00625461	0.0063286	Increase	un norm
91	Acceleration (left heel)	ns	0.109315	0.00816243	0.00714781	Decrease	un norm
91	Acceleration (right big toe)	ns	0.521839	0.00197464	0.00227029	Increase	un norm
91	Acceleration (right small toe)	ns	0.748774	0.00287901	0.00310775	Increase	un norm
91	Acceleration (right heel)	ns	0.75099	0.00309279	0.00351047	Increase	norm
91	Mean Angle (neck)	ns	0.942828	145.603	145.306	Decrease	norm
91	Mean Angle (left shoulder)	ns	0.705855	86.9261	85.6664	Decrease	norm
91	Mean Angle (left elbow)	ns	0.929747	164.951	164.758	Decrease	norm
91	Mean Angle (right hip)	ns	0.932719	175.283	175.39	Increase	norm
91	Mean Angle (right knee)	ns	0.109315	173.572	171.888	Decrease	un norm
91	Mean Angle (left hip)	ns	0.985962	175.656	175.635	Decrease	norm
91	Mean Angle (left knee)	**	0.00416361	175.274	171.173	Decrease	norm
91	Std Dev Angle (neck)	ns	0.962812	3.99431	4.04524	Increase	norm
91	Std Dev Angle (left shoulder)	ns	0.854771	11.7735	11.15	Decrease	norm
91	Std Dev Angle (left elbow)	ns	0.920023	8.55816	8.7231	Increase	norm
91	Std Dev Angle (right hip)	ns	0.951294	1.61711	1.5972	Decrease	norm
91	Std Dev Angle (right knee)	ns	0.243335	5.49016	6.50508	Increase	norm
91	Std Dev Angle (left hip)	ns	0.963542	1.35464	1.36867	Increase	norm
91	Std Dev Angle (left knee)	**	0.00132729	3.96294	7.30264	Increase	norm
9	Arm Swing Amplitude (right wrist)	ns	0.382692	0.11769	0.0874799	Decrease	norm
9	Arm Swing Amplitude (left wrist)	ns	0.437928	0.159678	0.118738	Decrease	norm
9	Step Length	ns	0.87278	0.401798	0.291079	Decrease	un norm
9	Cadence	ns	0.390882	104.288	105.388	Increase	un norm
9	Velocity (head)	ns	1	0.307279	0.223227	Decrease	un norm
9	Velocity (neck)	ns	1	0.303847	0.224017	Decrease	un norm
9	Velocity (right shoulder)	ns	0.931892	0.153925	0.116037	Decrease	un norm
9	Velocity (right elbow)	ns	0.931892	0.157198	0.123721	Decrease	un norm
9	Velocity (right wrist)	ns	0.931892	0.15447	0.124813	Decrease	un norm
9	Velocity (left shoulder)	ns	0.797648	0.163037	0.117572	Decrease	un norm
9	Velocity (left elbow)	ns	0.931892	0.165834	0.120254	Decrease	un norm
9	Velocity (left wrist)	ns	0.931892	0.172591	0.123185	Decrease	un norm
9	Velocity (right hip)	ns	0.260503	0.306955	0.227383	Decrease	norm
9	Velocity (right knee)	ns	0.630954	0.322993	0.232622	Decrease	un norm
9	Velocity (right ankle)	ns	0.327407	0.320452	0.243017	Decrease	norm
9	Velocity (left hip)	ns	0.87278	0.302109	0.226305	Decrease	un norm
9	Velocity (left knee)	ns	0.630954	0.294144	0.234462	Decrease	un norm
9	Velocity (left ankle)	ns	0.287434	0.287085	0.217002	Decrease	norm
9	Velocity (left big toe)	ns	0.338819	0.288607	0.222152	Decrease	norm
9	Velocity (left small toe)	ns	0.333809	0.28791	0.222159	Decrease	norm
9	Velocity (left heel)	ns	0.339048	0.285238	0.222364	Decrease	norm
9	Velocity (right big toe)	ns	0.387889	0.322509	0.248936	Decrease	norm
9	Velocity (right small toe)	ns	0.405468	0.322062	0.252405	Decrease	norm
9	Velocity (right heel)	ns	0.332128	0.318886	0.242703	Decrease	norm
9	Acceleration (head)	ns	0.99952	0.00464944	0.00465082	Increase	norm
9	Acceleration (neck)	ns	0.521839	0.00477448	0.00510504	Increase	un norm
9	Acceleration (right shoulder)	ns	0.797648	0.00281481	0.00474619	Increase	un norm
9	Acceleration (right elbow)	ns	0.797648	0.00385465	0.00564892	Increase	un norm
9	Acceleration (right wrist)	ns	0.797648	0.00365082	0.00470633	Increase	un norm
9	Acceleration (left shoulder)	ns	0.797648	0.00167358	0.00157758	Decrease	un norm
9	Acceleration (left elbow)	ns	0.441788	0.00381933	0.000573026	Decrease	un norm
9	Acceleration (left wrist)	ns	0.441788	0.00423695	0.000684212	Decrease	un norm
9	Acceleration (right hip)	ns	0.42334	0.00533883	0.00456373	Decrease	un norm
9	Acceleration (right knee)	ns	0.783461	0.00868747	0.00997759	Increase	norm
9	Acceleration (right ankle)	ns	1	0.0074071	0.00811322	Increase	un norm
9	Acceleration (left hip)	ns	0.630954	0.00533387	0.00407086	Decrease	un norm
9	Acceleration (left knee)	ns	0.0669248	0.0035397	0.010775	Increase	norm
9	Acceleration (left ankle)	ns	0.0541449	0.00234098	0.00952016	Increase	norm
9	Acceleration (left big toe)	**	0.00833847	0.00504561	0.0224203	Increase	norm
9	Acceleration (left small toe)	*	0.0368772	0.0051608	0.0216528	Increase	norm
9	Acceleration (left heel)	**	0.00646275	0.00296946	0.0162862	Increase	norm
9	Acceleration (right big toe)	ns	0.945362	0.0106576	0.010308	Decrease	norm
9	Acceleration (right small toe)	ns	0.87278	0.0101291	0.0115	Increase	un norm
9	Acceleration (right heel)	ns	0.155599	0.00800055	0.0203857	Increase	norm
9	Mean Angle (neck)	ns	0.583589	137.135	138.526	Increase	norm
9	Mean Angle (left shoulder)	*	0.0458747	76.1954	87.4419	Increase	norm
9	Mean Angle (left elbow)	ns	0.916701	169.136	169.269	Increase	norm
9	Mean Angle (right hip)	ns	0.766488	177.776	177.702	Decrease	norm
9	Mean Angle (right knee)	ns	0.495079	165.553	166.887	Increase	norm
9	Mean Angle (left hip)	ns	0.683158	177.103	176.749	Decrease	norm
9	Mean Angle (left knee)	ns	0.741799	165.471	164.534	Decrease	norm
9	Std Dev Angle (neck)	ns	0.410364	3.38909	2.84236	Decrease	norm
9	Std Dev Angle (left shoulder)	ns	0.204998	24.0448	14.1542	Decrease	norm
9	Std Dev Angle (left elbow)	ns	0.316444	5.49088	3.97519	Decrease	norm
9	Std Dev Angle (right hip)	ns	0.630954	1.17831	1.31772	Increase	un norm
9	Std Dev Angle (right knee)	ns	0.165598	12.1078	8.81691	Decrease	norm
9	Std Dev Angle (left hip)	ns	0.584536	1.58482	1.40434	Decrease	norm
9	Std Dev Angle (left knee)	ns	0.42334	11.928	10.1314	Decrease	un norm
23	Arm Swing Amplitude (right wrist)	ns	0.289224	0.143651	0.161479	Increase	norm
23	Arm Swing Amplitude (left wrist)	ns	0.690467	0.0698111	0.0741061	Increase	norm
23	Step Length	ns	0.0781691	0.40579	0.6189	Increase	un norm
23	Cadence	ns	0.41329	115.973	107.554	Decrease	norm
23	Velocity (head)	ns	0.200185	0.270701	0.218884	Decrease	un norm
23	Velocity (neck)	ns	0.241425	0.328869	0.261975	Decrease	norm
23	Velocity (right shoulder)	ns	0.797648	0.163061	0.141984	Decrease	un norm
23	Velocity (right elbow)	ns	0.549674	0.167802	0.139956	Decrease	un norm
23	Velocity (right wrist)	ns	0.549674	0.171452	0.146868	Decrease	un norm
23	Velocity (left shoulder)	ns	0.549674	0.185306	0.11227	Decrease	un norm
23	Velocity (left elbow)	ns	0.669146	0.15707	0.143035	Decrease	un norm
23	Velocity (left wrist)	ns	0.549674	0.18481	0.147828	Decrease	un norm
23	Velocity (right hip)	ns	0.200185	0.262323	0.209138	Decrease	un norm
23	Velocity (right knee)	ns	0.844234	0.255928	0.270481	Increase	norm
23	Velocity (right ankle)	ns	0.455674	0.272021	0.237694	Decrease	norm
23	Velocity (left hip)	*	0.0465813	0.323436	0.270773	Decrease	norm
23	Velocity (left knee)	ns	0.0781691	0.295552	0.255123	Decrease	un norm
23	Velocity (left ankle)	ns	0.699864	0.248591	0.222168	Decrease	norm
23	Velocity (left big toe)	ns	0.392506	0.289898	0.264564	Decrease	norm
23	Velocity (left small toe)	ns	0.349639	0.289315	0.260096	Decrease	norm
23	Velocity (left heel)	ns	0.242966	0.302641	0.26594	Decrease	norm
23	Velocity (right big toe)	ns	0.501662	0.283421	0.256554	Decrease	norm
23	Velocity (right small toe)	ns	0.392754	0.291502	0.256705	Decrease	norm
23	Velocity (right heel)	ns	0.182652	0.291336	0.24644	Decrease	norm
23	Acceleration (head)	ns	0.630954	0.121254	0.00716397	Decrease	un norm
23	Acceleration (neck)	ns	0.521839	0.17127	0.0088659	Decrease	un norm
23	Acceleration (right shoulder)	ns	0.944054	0.00442096	0.00465115	Increase	norm
23	Acceleration (right elbow)	ns	0.931892	0.00453585	0.00495938	Increase	un norm
23	Acceleration (right wrist)	ns	0.931892	0.00347205	0.00267716	Decrease	un norm
23	Acceleration (left shoulder)	ns	0.797648	0.00683402	0.00408417	Decrease	un norm
23	Acceleration (left elbow)	ns	0.811765	0.00381495	0.00454647	Increase	norm
23	Acceleration (left wrist)	ns	0.931892	0.00334343	0.00348085	Increase	un norm
23	Acceleration (right hip)	ns	0.748774	0.0991628	0.0123093	Decrease	un norm
23	Acceleration (right knee)	ns	0.15865	0.00547523	0.00948631	Increase	norm
23	Acceleration (right ankle)	ns	0.87278	0.00952489	0.0296678	Increase	un norm
23	Acceleration (left hip)	ns	0.200185	0.052026	0.00955423	Decrease	un norm
23	Acceleration (left knee)	ns	0.262332	0.00985603	0.0168445	Increase	un norm
23	Acceleration (left ankle)	ns	0.996424	0.0205014	0.0204551	Decrease	norm
23	Acceleration (left big toe)	ns	0.630954	0.010616	0.0105582	Decrease	un norm
23	Acceleration (left small toe)	ns	0.521839	0.0119281	0.0105879	Decrease	un norm
23	Acceleration (left heel)	ns	0.512201	0.0193386	0.0127647	Decrease	norm
23	Acceleration (right big toe)	ns	0.200185	0.00769948	0.0127102	Increase	un norm
23	Acceleration (right small toe)	ns	0.262332	0.00714827	0.0122503	Increase	un norm
23	Acceleration (right heel)	ns	0.630954	0.00772931	0.0149657	Increase	un norm
23	Mean Angle (neck)	ns	0.635701	142.279	139.399	Decrease	norm
23	Mean Angle (left shoulder)	ns	0.956287	75.3516	75.4787	Increase	norm
23	Mean Angle (left elbow)	ns	0.275234	154.894	161.115	Increase	un norm
23	Mean Angle (right hip)	ns	0.87278	175.116	176.524	Increase	un norm
23	Mean Angle (right knee)	ns	0.336668	158.86	150.738	Decrease	un norm
23	Mean Angle (left hip)	ns	0.87278	175.275	175.522	Increase	un norm
23	Mean Angle (left knee)	ns	0.42334	160.748	150.661	Decrease	un norm
23	Std Dev Angle (neck)	ns	0.336668	10.1185	23.2203	Increase	un norm
23	Std Dev Angle (left shoulder)	ns	0.776958	16.0495	13.8692	Decrease	norm
23	Std Dev Angle (left elbow)	ns	0.442957	19.6709	6.63291	Decrease	norm
23	Std Dev Angle (right hip)	ns	1	8.64602	3.02589	Decrease	un norm
23	Std Dev Angle (right knee)	ns	0.262332	23.8057	32.5581	Increase	un norm
23	Std Dev Angle (left hip)	ns	1	8.45467	6.45698	Decrease	un norm
23	Std Dev Angle (left knee)	ns	0.200185	20.5926	31.4191	Increase	un norm
47	Arm Swing Amplitude (right wrist)	ns	0.0595921	0.102215	0.154075	Increase	norm
47	Arm Swing Amplitude (left wrist)	ns	0.228566	0.126035	0.162729	Increase	norm
47	Step Length	***	0.000445725	0.295718	0.354254	Increase	norm
47	Cadence	ns	0.815625	97.8098	98.6371	Increase	norm
47	Velocity (head)	*	0.0422844	0.237684	0.287429	Increase	norm
47	Velocity (neck)	ns	0.0653888	0.237993	0.282775	Increase	norm
47	Velocity (right shoulder)	ns	0.797648	0.12002	0.140625	Increase	un norm
47	Velocity (right elbow)	ns	0.808661	0.122807	0.144524	Increase	norm
47	Velocity (right wrist)	ns	0.791309	0.122918	0.146929	Increase	norm
47	Velocity (left shoulder)	ns	0.549674	0.125618	0.14614	Increase	un norm
47	Velocity (left elbow)	ns	0.549674	0.129113	0.149773	Increase	un norm
47	Velocity (left wrist)	ns	0.441788	0.135114	0.157821	Increase	un norm
47	Velocity (right hip)	ns	0.119241	0.235291	0.27578	Increase	norm
47	Velocity (right knee)	*	0.0355537	0.233284	0.28625	Increase	norm
47	Velocity (right ankle)	ns	0.190514	0.236605	0.27471	Increase	norm
47	Velocity (left hip)	ns	0.0530763	0.247132	0.297655	Increase	norm
47	Velocity (left knee)	ns	0.0803106	0.251877	0.302798	Increase	norm
47	Velocity (left ankle)	ns	0.267723	0.23924	0.277901	Increase	norm
47	Velocity (left big toe)	ns	0.103945	0.235473	0.283179	Increase	norm
47	Velocity (left small toe)	ns	0.139704	0.23665	0.284102	Increase	norm
47	Velocity (left heel)	ns	0.339902	0.235786	0.27356	Increase	norm
47	Velocity (right big toe)	ns	0.321207	0.243858	0.27245	Increase	norm
47	Velocity (right small toe)	ns	0.316996	0.242973	0.272505	Increase	norm
47	Velocity (right heel)	ns	0.246738	0.238142	0.273277	Increase	norm
47	Acceleration (head)	ns	0.0682975	0.00421163	0.00746675	Increase	norm
47	Acceleration (neck)	*	0.0258447	0.003535	0.00776326	Increase	norm
47	Acceleration (right shoulder)	ns	0.441788	0.00175383	0.00460483	Increase	un norm
47	Acceleration (right elbow)	ns	0.549674	0.00273931	0.0068767	Increase	un norm
47	Acceleration (right wrist)	ns	0.236909	0.00208116	0.00665343	Increase	norm
47	Acceleration (left shoulder)	ns	0.549674	0.00172797	0.00427475	Increase	un norm
47	Acceleration (left elbow)	ns	0.797648	0.00202468	0.00557411	Increase	un norm
47	Acceleration (left wrist)	ns	0.669146	0.00107841	0.0116319	Increase	un norm
47	Acceleration (right hip)	ns	0.0945375	0.00382862	0.00822087	Increase	norm
47	Acceleration (right knee)	ns	0.0546639	0.00359981	0.0119643	Increase	un norm
47	Acceleration (right ankle)	ns	0.336668	0.0045581	0.0120707	Increase	un norm
47	Acceleration (left hip)	ns	0.338917	0.00683532	0.00954899	Increase	norm
47	Acceleration (left knee)	ns	0.42334	0.00650606	0.00891021	Increase	un norm
47	Acceleration (left ankle)	ns	0.521839	0.0130443	0.00577055	Decrease	un norm
47	Acceleration (left big toe)	ns	0.336668	0.0107152	0.00497215	Decrease	un norm
47	Acceleration (left small toe)	ns	0.262332	0.0138816	0.0047166	Decrease	un norm
47	Acceleration (left heel)	ns	0.42334	0.0163468	0.0065977	Decrease	un norm
47	Acceleration (right big toe)	ns	0.777388	0.00390197	0.00472426	Increase	norm
47	Acceleration (right small toe)	ns	0.665278	0.00465994	0.00601447	Increase	norm
47	Acceleration (right heel)	ns	0.109826	0.00423821	0.0135845	Increase	norm
47	Mean Angle (neck)	ns	0.571006	131.377	133.093	Increase	norm
47	Mean Angle (left shoulder)	ns	0.248213	94.648	90.3176	Decrease	un norm
47	Mean Angle (left elbow)	ns	0.466236	169.371	170.294	Increase	norm
47	Mean Angle (right hip)	ns	0.609747	176.752	177.175	Increase	norm
47	Mean Angle (right knee)	ns	0.749596	167.305	167.094	Decrease	norm
47	Mean Angle (left hip)	ns	0.500509	176.884	177.334	Increase	norm
47	Mean Angle (left knee)	ns	0.168845	162.924	164.662	Increase	norm
47	Std Dev Angle (neck)	ns	0.833546	4.36245	4.55482	Increase	norm
47	Std Dev Angle (left shoulder)	ns	0.563703	22.8806	18.3399	Decrease	un norm
47	Std Dev Angle (left elbow)	ns	0.800561	3.80353	3.63788	Decrease	norm
47	Std Dev Angle (right hip)	ns	0.52829	1.61354	1.48903	Decrease	norm
47	Std Dev Angle (right knee)	ns	0.0979321	9.53882	10.1926	Increase	norm
47	Std Dev Angle (left hip)	ns	0.221162	1.62151	2.14391	Increase	norm
47	Std Dev Angle (left knee)	***	0.000670813	9.35991	11.6313	Increase	norm
62	Arm Swing Amplitude (right wrist)	*	0.0470448	0.0896647	0.142591	Increase	norm
62	Arm Swing Amplitude (left wrist)	ns	0.827259	0.129704	0.125266	Decrease	un norm
62	Step Length	ns	0.204369	0.340848	0.368325	Increase	norm
62	Cadence	ns	0.408085	130.075	126.032	Decrease	norm
62	Velocity (head)	ns	0.073407	0.327226	0.278373	Decrease	norm
62	Velocity (neck)	ns	0.0578184	0.322225	0.262783	Decrease	norm
62	Velocity (right shoulder)	ns	0.797648	0.159639	0.143713	Decrease	un norm
62	Velocity (right elbow)	ns	0.797648	0.163983	0.14774	Decrease	un norm
62	Velocity (right wrist)	ns	0.797648	0.163869	0.148801	Decrease	un norm
62	Velocity (left shoulder)	ns	0.441788	0.178249	0.121888	Decrease	un norm
62	Velocity (left elbow)	ns	0.441788	0.180431	0.118468	Decrease	un norm
62	Velocity (left wrist)	ns	0.441788	0.179528	0.114623	Decrease	un norm
62	Velocity (right hip)	ns	0.0648701	0.319144	0.260403	Decrease	norm
62	Velocity (right knee)	*	0.0325156	0.326814	0.255909	Decrease	norm
62	Velocity (right ankle)	**	0.00672843	0.332174	0.243081	Decrease	norm
62	Velocity (left hip)	ns	0.171142	0.315476	0.267256	Decrease	norm
62	Velocity (left knee)	ns	0.121886	0.325434	0.26917	Decrease	norm
62	Velocity (left ankle)	ns	0.334239	0.301777	0.25834	Decrease	norm
62	Velocity (left big toe)	ns	0.338394	0.299617	0.25943	Decrease	norm
62	Velocity (left small toe)	ns	0.319224	0.296458	0.252916	Decrease	norm
62	Velocity (left heel)	ns	0.316978	0.297161	0.25139	Decrease	norm
62	Velocity (right big toe)	*	0.0166122	0.343506	0.263793	Decrease	norm
62	Velocity (right small toe)	*	0.0164888	0.339775	0.26155	Decrease	norm
62	Velocity (right heel)	**	0.00942914	0.333436	0.243896	Decrease	norm
62	Acceleration (head)	*	0.0161272	0.00357538	0.00923695	Increase	norm
62	Acceleration (neck)	*	0.0163092	0.00309524	0.0104504	Increase	un norm
62	Acceleration (right shoulder)	ns	0.669146	0.00293121	0.00560264	Increase	un norm
62	Acceleration (right elbow)	ns	0.931892	0.00388974	0.00562281	Increase	un norm
62	Acceleration (right wrist)	ns	0.931892	0.00321488	0.00517907	Increase	un norm
62	Acceleration (left shoulder)	ns	0.441788	0.000853097	0.00633813	Increase	un norm
62	Acceleration (left elbow)	ns	0.441788	0.00104945	0.00440483	Increase	un norm
62	Acceleration (left wrist)	ns	0.441788	0.00157011	0.00689904	Increase	un norm
62	Acceleration (right hip)	ns	0.0546639	0.00476789	0.0123187	Increase	un norm
62	Acceleration (right knee)	ns	0.748774	0.010645	0.00730212	Decrease	un norm
62	Acceleration (right ankle)	ns	0.630954	0.00864323	0.0122037	Increase	un norm
62	Acceleration (left hip)	**	0.00530595	0.00425535	0.0116449	Increase	norm
62	Acceleration (left knee)	ns	0.42334	0.0129538	0.0114681	Decrease	un norm
62	Acceleration (left ankle)	ns	0.542505	0.0145866	0.0181875	Increase	norm
62	Acceleration (left big toe)	ns	0.528802	0.0130045	0.0187377	Increase	norm
62	Acceleration (left small toe)	ns	0.579079	0.014092	0.0182339	Increase	norm
62	Acceleration (left heel)	ns	0.521839	0.0137717	0.016107	Increase	un norm
62	Acceleration (right big toe)	ns	0.155076	0.00502206	0.0169909	Increase	norm
62	Acceleration (right small toe)	ns	0.164871	0.00395464	0.0118127	Increase	norm
62	Acceleration (right heel)	ns	0.630954	0.00724912	0.0140972	Increase	un norm
62	Mean Angle (neck)	ns	0.42334	143.232	141.916	Decrease	un norm
62	Mean Angle (left shoulder)	**	0.00983825	90.2893	79.9491	Decrease	norm
62	Mean Angle (left elbow)	ns	0.310124	160.357	162.532	Increase	norm
62	Mean Angle (right hip)	ns	0.944544	175.64	175.737	Increase	norm
62	Mean Angle (right knee)	ns	0.0982602	167.18	168.636	Increase	norm
62	Mean Angle (left hip)	ns	0.134942	176.238	173.637	Decrease	norm
62	Mean Angle (left knee)	ns	0.699278	168.29	167.92	Decrease	norm
62	Std Dev Angle (neck)	*	0.0270499	3.55282	7.20588	Increase	norm
62	Std Dev Angle (left shoulder)	**	0.00399539	20.222	11.9254	Decrease	norm
62	Std Dev Angle (left elbow)	***	0.000250665	5.69127	8.59261	Increase	norm
62	Std Dev Angle (right hip)	ns	0.87278	1.97822	1.8674	Decrease	un norm
62	Std Dev Angle (right knee)	ns	0.165577	10.6347	9.6748	Decrease	norm
62	Std Dev Angle (left hip)	ns	0.172647	2.07522	2.87684	Increase	norm
62	Std Dev Angle (left knee)	ns	0.143199	11.2287	10.1616	Decrease	norm
61	Arm Swing Amplitude (right wrist)	ns	0.261446	0.164614	0.147953	Decrease	norm
61	Arm Swing Amplitude (left wrist)	ns	0.139975	0.202738	0.159566	Decrease	norm
61	Step Length	**	0.00358732	0.447189	0.393068	Decrease	norm
61	Cadence	*	0.0199173	116.567	106.648	Decrease	norm
61	Velocity (head)	**	0.00394775	0.396896	0.266232	Decrease	un norm
61	Velocity (neck)	***	9.22053e-06	0.38865	0.228792	Decrease	norm
61	Velocity (right shoulder)	ns	0.441788	0.201815	0.122052	Decrease	un norm
61	Velocity (right elbow)	ns	0.441788	0.208818	0.123884	Decrease	un norm
61	Velocity (right wrist)	ns	0.441788	0.210522	0.131474	Decrease	un norm
61	Velocity (left shoulder)	ns	0.441788	0.204101	0.114173	Decrease	un norm
61	Velocity (left elbow)	ns	0.441788	0.207588	0.115493	Decrease	un norm
61	Velocity (left wrist)	ns	0.441788	0.225033	0.125991	Decrease	un norm
61	Velocity (right hip)	***	5.20978e-06	0.39266	0.226832	Decrease	norm
61	Velocity (right knee)	***	2.10854e-05	0.41729	0.244439	Decrease	norm
61	Velocity (right ankle)	***	0.000128653	0.423462	0.239951	Decrease	norm
61	Velocity (left hip)	***	4.55333e-06	0.398068	0.232198	Decrease	norm
61	Velocity (left knee)	***	8.65588e-06	0.396612	0.233855	Decrease	norm
61	Velocity (left ankle)	***	5.04767e-05	0.385461	0.210256	Decrease	norm
61	Velocity (left big toe)	***	0.00038232	0.374905	0.219922	Decrease	norm
61	Velocity (left small toe)	***	9.61602e-05	0.376312	0.21167	Decrease	norm
61	Velocity (left heel)	***	4.97369e-05	0.373189	0.189361	Decrease	norm
61	Velocity (right big toe)	***	2.15504e-05	0.449254	0.285419	Decrease	norm
61	Velocity (right small toe)	***	3.77182e-05	0.448491	0.282766	Decrease	norm
61	Velocity (right heel)	**	0.00394775	0.433463	0.248902	Decrease	un norm
61	Acceleration (head)	***	0.000158172	0.00317639	0.0142426	Increase	norm
61	Acceleration (neck)	***	1.81769e-06	0.00243374	0.0152444	Increase	norm
61	Acceleration (right shoulder)	ns	0.441788	0.00205478	0.00716333	Increase	un norm
61	Acceleration (right elbow)	ns	0.441788	0.00465811	0.0099824	Increase	un norm
61	Acceleration (right wrist)	ns	0.173762	0.00313913	0.0111236	Increase	norm
61	Acceleration (left shoulder)	ns	0.151167	0.00191432	0.00782156	Increase	norm
61	Acceleration (left elbow)	ns	0.195908	0.00195699	0.00646816	Increase	norm
61	Acceleration (left wrist)	ns	0.543695	0.00800838	0.0134025	Increase	norm
61	Acceleration (right hip)	*	0.0104056	0.00335724	0.0158009	Increase	un norm
61	Acceleration (right knee)	ns	0.200146	0.00956264	0.015788	Increase	norm
61	Acceleration (right ankle)	ns	0.200185	0.00754901	0.0170366	Increase	un norm
61	Acceleration (left hip)	***	0.000720663	0.00365738	0.0167987	Increase	norm
61	Acceleration (left knee)	ns	0.0807588	0.00552059	0.0163324	Increase	norm
61	Acceleration (left ankle)	ns	0.630954	0.00786263	0.0108963	Increase	un norm
61	Acceleration (left big toe)	ns	0.87278	0.00670235	0.0107679	Increase	un norm
61	Acceleration (left small toe)	ns	0.521839	0.00637379	0.012365	Increase	un norm
61	Acceleration (left heel)	ns	0.630954	0.00796982	0.0118822	Increase	un norm
61	Acceleration (right big toe)	ns	0.168458	0.00822821	0.0206749	Increase	norm
61	Acceleration (right small toe)	ns	0.42334	0.00952244	0.0201528	Increase	un norm
61	Acceleration (right heel)	ns	0.149541	0.00506603	0.0135345	Increase	un norm
61	Mean Angle (neck)	***	0.000471014	134.936	148.095	Increase	norm
61	Mean Angle (left shoulder)	ns	0.0787025	111.491	101.308	Decrease	norm
61	Mean Angle (left elbow)	**	0.0086628	161.194	167.803	Increase	norm
61	Mean Angle (right hip)	***	6.7172e-05	177.711	175.205	Decrease	norm
61	Mean Angle (right knee)	ns	0.0751862	165.578	167.712	Increase	norm
61	Mean Angle (left hip)	**	0.00634825	177.971	177.126	Decrease	norm
61	Mean Angle (left knee)	ns	0.189323	167.096	168.54	Increase	norm
61	Std Dev Angle (neck)	*	0.0100282	5.92627	10.8132	Increase	norm
61	Std Dev Angle (left shoulder)	ns	0.602097	19.6068	18.6182	Decrease	norm
61	Std Dev Angle (left elbow)	*	0.0135159	14.1957	8.77614	Decrease	norm
61	Std Dev Angle (right hip)	ns	0.130331	1.882	2.49556	Increase	norm
61	Std Dev Angle (right knee)	*	0.0163092	14.7141	10.8853	Decrease	un norm
61	Std Dev Angle (left hip)	ns	0.151849	1.37516	1.7195	Increase	norm
61	Std Dev Angle (left knee)	**	0.00648531	13.6551	10.4654	Decrease	un norm
78	Arm Swing Amplitude (right wrist)	ns	0.537741	0.156969	0.146171	Decrease	norm
78	Arm Swing Amplitude (left wrist)	**	0.00823325	0.120832	0.170619	Increase	norm
78	Step Length	ns	0.30575	0.392123	0.377184	Decrease	norm
78	Cadence	ns	0.187499	117.049	105.444	Decrease	norm
78	Velocity (head)	**	0.00342239	0.348011	0.239321	Decrease	norm
78	Velocity (neck)	**	0.0032496	0.342594	0.219198	Decrease	norm
78	Velocity (right shoulder)	ns	0.441788	0.178942	0.11654	Decrease	un norm
78	Velocity (right elbow)	ns	0.549674	0.181384	0.122295	Decrease	un norm
78	Velocity (right wrist)	ns	0.549674	0.183195	0.12533	Decrease	un norm
78	Velocity (left shoulder)	ns	0.441788	0.184292	0.116175	Decrease	un norm
78	Velocity (left elbow)	ns	0.441788	0.189841	0.119223	Decrease	un norm
78	Velocity (left wrist)	ns	0.441788	0.198937	0.126783	Decrease	un norm
78	Velocity (right hip)	**	0.00608127	0.341523	0.225162	Decrease	norm
78	Velocity (right knee)	**	0.00968204	0.356569	0.236433	Decrease	norm
78	Velocity (right ankle)	*	0.0368256	0.350995	0.233072	Decrease	norm
78	Velocity (left hip)	**	0.00613375	0.339593	0.220362	Decrease	norm
78	Velocity (left knee)	**	0.00134507	0.346928	0.212409	Decrease	norm
78	Velocity (left ankle)	*	0.0109693	0.339553	0.203969	Decrease	norm
78	Velocity (left big toe)	*	0.0136504	0.336692	0.216885	Decrease	norm
78	Velocity (left small toe)	*	0.0122091	0.336323	0.21007	Decrease	norm
78	Velocity (left heel)	*	0.0100458	0.341934	0.195399	Decrease	norm
78	Velocity (right big toe)	ns	0.064887	0.355755	0.249494	Decrease	norm
78	Velocity (right small toe)	ns	0.0683799	0.356133	0.251368	Decrease	norm
78	Velocity (right heel)	*	0.0435567	0.349774	0.232382	Decrease	norm
78	Acceleration (head)	***	1.95467e-05	0.00302091	0.0113272	Increase	norm
78	Acceleration (neck)	***	0.000486101	0.00433098	0.0122198	Increase	norm
78	Acceleration (right shoulder)	ns	0.417541	0.00275789	0.00515551	Increase	norm
78	Acceleration (right elbow)	ns	0.441788	0.000927754	0.00439277	Increase	un norm
78	Acceleration (right wrist)	ns	0.669146	0.00171767	0.00517751	Increase	un norm
78	Acceleration (left shoulder)	ns	0.154549	0.00155939	0.00730274	Increase	norm
78	Acceleration (left elbow)	ns	0.441788	0.00161897	0.00788674	Increase	un norm
78	Acceleration (left wrist)	ns	0.441788	0.00236787	0.00939077	Increase	un norm
78	Acceleration (right hip)	ns	0.234965	0.00783763	0.0131359	Increase	norm
78	Acceleration (right knee)	ns	0.341595	0.00750418	0.0102447	Increase	norm
78	Acceleration (right ankle)	ns	0.265274	0.00562118	0.0124446	Increase	norm
78	Acceleration (left hip)	**	0.00394775	0.00316375	0.0143005	Increase	un norm
78	Acceleration (left knee)	ns	0.413394	0.00564131	0.00875891	Increase	norm
78	Acceleration (left ankle)	*	0.0141819	0.00394406	0.0195494	Increase	norm
78	Acceleration (left big toe)	ns	0.0894004	0.0070425	0.0214571	Increase	norm
78	Acceleration (left small toe)	ns	0.0641987	0.0066083	0.0242759	Increase	norm
78	Acceleration (left heel)	*	0.0140214	0.00582058	0.0198062	Increase	norm
78	Acceleration (right big toe)	ns	0.318385	0.00927829	0.0192434	Increase	norm
78	Acceleration (right small toe)	ns	0.251455	0.0090277	0.023399	Increase	norm
78	Acceleration (right heel)	ns	0.136217	0.00615901	0.0222665	Increase	norm
78	Mean Angle (neck)	ns	0.188872	154.493	158.155	Increase	norm
78	Mean Angle (left shoulder)	ns	0.302217	94.4968	96.8761	Increase	norm
78	Mean Angle (left elbow)	*	0.0188887	171.902	169.146	Decrease	norm
78	Mean Angle (right hip)	*	0.0189265	176.76	175.43	Decrease	norm
78	Mean Angle (right knee)	*	0.0425348	170.749	168.295	Decrease	norm
78	Mean Angle (left hip)	ns	0.0974617	176.628	174.746	Decrease	norm
78	Mean Angle (left knee)	ns	0.308797	170.728	169.744	Decrease	norm
78	Std Dev Angle (neck)	ns	0.0702563	3.98092	6.49644	Increase	norm
78	Std Dev Angle (left shoulder)	ns	0.0572065	12.7881	4.35553	Decrease	norm
78	Std Dev Angle (left elbow)	ns	0.883324	5.38446	5.23601	Decrease	norm
78	Std Dev Angle (right hip)	ns	0.228109	1.566	2.00628	Increase	norm
78	Std Dev Angle (right knee)	ns	0.585807	9.39608	9.86601	Increase	norm
78	Std Dev Angle (left hip)	ns	0.387687	1.59844	1.89391	Increase	norm
78	Std Dev Angle (left knee)	*	0.037373	9.24325	10.4823	Increase	un norm
2	Arm Swing Amplitude (right wrist)	ns	0.244363	0.088838	0.112075	Increase	norm
2	Arm Swing Amplitude (left wrist)	ns	0.275234	0.224559	0.241055	Increase	un norm
2	Step Length	ns	0.0546639	0.441117	0.463847	Increase	un norm
2	Cadence	ns	0.141645	94.7299	100.686	Increase	un norm
2	Velocity (head)	ns	0.0554041	0.313384	0.364644	Increase	norm
2	Velocity (neck)	ns	0.0744486	0.30808	0.362465	Increase	norm
2	Velocity (right shoulder)	ns	0.669146	0.154337	0.182339	Increase	un norm
2	Velocity (right elbow)	ns	0.669146	0.161003	0.193743	Increase	un norm
2	Velocity (right wrist)	ns	0.669146	0.162239	0.190414	Increase	un norm
2	Velocity (left shoulder)	ns	0.549674	0.166379	0.192153	Increase	un norm
2	Velocity (left elbow)	ns	0.441788	0.174251	0.196335	Increase	un norm
2	Velocity (left wrist)	ns	0.441788	0.179466	0.192379	Increase	un norm
2	Velocity (right hip)	ns	0.0583406	0.311981	0.372384	Increase	norm
2	Velocity (right knee)	*	0.0448759	0.319204	0.384878	Increase	norm
2	Velocity (right ankle)	ns	0.322671	0.318976	0.363762	Increase	norm
2	Velocity (left hip)	ns	0.0865421	0.30252	0.36348	Increase	norm
2	Velocity (left knee)	*	0.037373	0.306177	0.385163	Increase	un norm
2	Velocity (left ankle)	ns	0.0781691	0.311127	0.366848	Increase	un norm
2	Velocity (left big toe)	ns	0.264337	0.318415	0.356611	Increase	norm
2	Velocity (left small toe)	ns	0.109315	0.315134	0.360343	Increase	un norm
2	Velocity (left heel)	ns	0.0781691	0.309998	0.369808	Increase	un norm
2	Velocity (right big toe)	ns	0.320281	0.317674	0.358043	Increase	norm
2	Velocity (right small toe)	ns	0.100094	0.317361	0.379743	Increase	norm
2	Velocity (right heel)	ns	0.329431	0.317869	0.366145	Increase	norm
2	Acceleration (head)	*	0.0353	0.00352051	0.00816353	Increase	norm
2	Acceleration (neck)	**	0.00648531	0.00293582	0.0100617	Increase	un norm
2	Acceleration (right shoulder)	ns	0.931892	0.00364756	0.00430363	Increase	un norm
2	Acceleration (right elbow)	ns	0.797648	0.00260452	0.00401379	Increase	un norm
2	Acceleration (right wrist)	ns	0.797648	0.00358866	0.00469567	Increase	un norm
2	Acceleration (left shoulder)	ns	0.175068	0.00131891	0.00594897	Increase	norm
2	Acceleration (left elbow)	ns	0.441788	0.00133118	0.00887311	Increase	un norm
2	Acceleration (left wrist)	ns	0.441788	0.000978287	0.0115837	Increase	un norm
2	Acceleration (right hip)	ns	0.428829	0.00727776	0.0101539	Increase	norm
2	Acceleration (right knee)	*	0.0179429	0.00541936	0.0138418	Increase	norm
2	Acceleration (right ankle)	ns	0.336668	0.0152432	0.0347101	Increase	un norm
2	Acceleration (left hip)	*	0.0202352	0.00262832	0.00943775	Increase	norm
2	Acceleration (left knee)	ns	0.87278	0.00640226	0.016692	Increase	un norm
2	Acceleration (left ankle)	ns	0.336668	0.00380501	0.00668099	Increase	un norm
2	Acceleration (left big toe)	ns	0.748774	0.0130831	0.0128941	Decrease	un norm
2	Acceleration (left small toe)	ns	0.42334	0.0042929	0.0121891	Increase	un norm
2	Acceleration (left heel)	ns	0.748774	0.00486304	0.00690989	Increase	un norm
2	Acceleration (right big toe)	ns	0.394746	0.0163444	0.0330657	Increase	norm
2	Acceleration (right small toe)	ns	0.943663	0.0163347	0.0156477	Decrease	norm
2	Acceleration (right heel)	ns	0.200185	0.013965	0.0354117	Increase	un norm
2	Mean Angle (neck)	ns	0.398559	141.772	144.831	Increase	norm
2	Mean Angle (left shoulder)	ns	0.381841	112.628	107.692	Decrease	norm
2	Mean Angle (left elbow)	ns	0.371812	167.274	166.159	Decrease	norm
2	Mean Angle (right hip)	ns	0.109315	176.421	177.259	Increase	un norm
2	Mean Angle (right knee)	ns	0.303714	167.266	166.519	Decrease	norm
2	Mean Angle (left hip)	ns	0.210558	177.917	177.446	Decrease	norm
2	Mean Angle (left knee)	ns	0.362463	166.046	164.393	Decrease	norm
2	Std Dev Angle (neck)	ns	0.87278	5.46942	4.29801	Decrease	un norm
2	Std Dev Angle (left shoulder)	**	0.00930885	28.4939	17.9517	Decrease	norm
2	Std Dev Angle (left elbow)	***	9.85722e-06	5.06185	8.61167	Increase	norm
2	Std Dev Angle (right hip)	ns	0.200185	1.67598	1.90931	Increase	un norm
2	Std Dev Angle (right knee)	ns	0.178604	11.9309	12.4072	Increase	norm
2	Std Dev Angle (left hip)	ns	0.777362	1.48079	1.548	Increase	norm
2	Std Dev Angle (left knee)	*	0.0136336	11.7456	14.7422	Increase	norm
55	Arm Swing Amplitude (right wrist)	ns	0.190518	0.0949327	0.150945	Increase	norm
55	Arm Swing Amplitude (left wrist)	**	0.00906178	0.104272	0.147824	Increase	norm
55	Step Length	*	0.0311124	0.343831	0.392332	Increase	norm
55	Cadence	ns	0.118102	120.848	124.729	Increase	norm
55	Velocity (head)	**	0.00119766	0.332713	0.205894	Decrease	norm
55	Velocity (neck)	**	0.00137792	0.332179	0.182532	Decrease	norm
55	Velocity (right shoulder)	ns	0.441788	0.166194	0.064556	Decrease	un norm
55	Velocity (right elbow)	ns	0.441788	0.167808	0.0688799	Decrease	un norm
55	Velocity (right wrist)	ns	0.441788	0.171316	0.0789291	Decrease	un norm
55	Velocity (left shoulder)	ns	0.441788	0.176935	0.104618	Decrease	un norm
55	Velocity (left elbow)	ns	0.441788	0.181252	0.105736	Decrease	un norm
55	Velocity (left wrist)	ns	0.441788	0.185172	0.11835	Decrease	un norm
55	Velocity (right hip)	**	0.00548578	0.328176	0.19593	Decrease	norm
55	Velocity (right knee)	**	0.00690409	0.333823	0.199094	Decrease	norm
55	Velocity (right ankle)	*	0.0113795	0.329168	0.190737	Decrease	norm
55	Velocity (left hip)	**	0.00122954	0.332213	0.189456	Decrease	norm
55	Velocity (left knee)	***	0.00081757	0.341477	0.199221	Decrease	norm
55	Velocity (left ankle)	**	0.00369879	0.335198	0.184097	Decrease	norm
55	Velocity (left big toe)	**	0.00715457	0.323752	0.192921	Decrease	norm
55	Velocity (left small toe)	**	0.00588651	0.325449	0.187326	Decrease	norm
55	Velocity (left heel)	**	0.0021287	0.33767	0.165064	Decrease	norm
55	Velocity (right big toe)	ns	0.0845159	0.334739	0.232595	Decrease	norm
55	Velocity (right small toe)	ns	0.0852982	0.333437	0.229981	Decrease	norm
55	Velocity (right heel)	*	0.0358101	0.327239	0.199257	Decrease	norm
55	Acceleration (head)	**	0.00107094	0.00317052	0.0140851	Increase	norm
55	Acceleration (neck)	**	0.00394775	0.0039617	0.0149089	Increase	un norm
55	Acceleration (right shoulder)	ns	0.441788	0.00157555	0.00908921	Increase	un norm
55	Acceleration (right elbow)	ns	0.441788	0.002897	0.012141	Increase	un norm
55	Acceleration (right wrist)	ns	0.441788	0.00167035	0.0121191	Increase	un norm
55	Acceleration (left shoulder)	ns	0.441788	0.00287799	0.00786269	Increase	un norm
55	Acceleration (left elbow)	ns	0.390664	0.00368868	0.00708652	Increase	norm
55	Acceleration (left wrist)	ns	0.350175	0.00584823	0.0120256	Increase	norm
55	Acceleration (right hip)	**	0.00394775	0.00333047	0.0146197	Increase	un norm
55	Acceleration (right knee)	ns	0.145197	0.00707237	0.0146962	Increase	norm
55	Acceleration (right ankle)	ns	0.176603	0.0130334	0.0258806	Increase	norm
55	Acceleration (left hip)	*	0.0332477	0.00273934	0.0110559	Increase	norm
55	Acceleration (left knee)	ns	0.0929085	0.00736375	0.0182441	Increase	norm
55	Acceleration (left ankle)	ns	0.200185	0.00746873	0.0213034	Increase	un norm
55	Acceleration (left big toe)	ns	0.201933	0.00558117	0.0159005	Increase	norm
55	Acceleration (left small toe)	ns	0.119909	0.00392162	0.0155938	Increase	norm
55	Acceleration (left heel)	ns	0.267769	0.0103992	0.0200819	Increase	norm
55	Acceleration (right big toe)	ns	0.251002	0.0152458	0.0275598	Increase	norm
55	Acceleration (right small toe)	ns	0.137598	0.0122572	0.0289688	Increase	norm
55	Acceleration (right heel)	ns	0.462879	0.0150266	0.024131	Increase	norm
55	Mean Angle (neck)	ns	0.792527	158.702	159.571	Increase	norm
55	Mean Angle (left shoulder)	ns	0.304505	105.347	100.637	Decrease	norm
55	Mean Angle (left elbow)	*	0.0318764	169.09	170.273	Increase	norm
55	Mean Angle (right hip)	**	0.00632282	177.481	175.579	Decrease	norm
55	Mean Angle (right knee)	ns	0.685183	166.495	167.072	Increase	norm
55	Mean Angle (left hip)	ns	1	176.561	176.5	Decrease	un norm
55	Mean Angle (left knee)	ns	0.253569	167.01	164.841	Decrease	norm
55	Std Dev Angle (neck)	**	0.00178928	1.95857	6.40677	Increase	norm
55	Std Dev Angle (left shoulder)	ns	0.252142	20.553	15.362	Decrease	norm
55	Std Dev Angle (left elbow)	**	0.00368159	3.29959	5.82604	Increase	norm
55	Std Dev Angle (right hip)	*	0.0184051	1.41874	2.69036	Increase	norm
55	Std Dev Angle (right knee)	ns	0.551432	9.61459	9.32654	Decrease	norm
55	Std Dev Angle (left hip)	ns	0.487443	1.70373	1.88855	Increase	norm
55	Std Dev Angle (left knee)	ns	0.990177	10.7628	10.7754	Increase	norm
70	Arm Swing Amplitude (right wrist)	ns	0.542504	0.0942942	0.0761736	Decrease	norm
70	Arm Swing Amplitude (left wrist)	ns	0.959101	0.0823355	0.0829701	Increase	norm
70	Step Length	ns	0.87278	0.479831	0.489059	Increase	un norm
70	Cadence	ns	0.380166	102.558	126.927	Increase	norm
70	Velocity (head)	ns	0.630954	0.13347	0.160627	Increase	un norm
70	Velocity (neck)	ns	0.200185	0.106971	0.219652	Increase	un norm
70	Velocity (right shoulder)	ns	0.931892	0.0569353	0.0453579	Decrease	un norm
70	Velocity (right elbow)	ns	0.931892	0.046495	0.0473146	Increase	un norm
70	Velocity (right wrist)	ns	0.931892	0.0634998	0.0560407	Decrease	un norm
70	Velocity (left shoulder)	ns	0.964535	0.0680509	0.0701596	Increase	norm
70	Velocity (left elbow)	ns	0.973488	0.0693317	0.0709582	Increase	norm
70	Velocity (left wrist)	ns	0.977862	0.0710461	0.0724943	Increase	norm
70	Velocity (right hip)	ns	0.318474	0.109512	0.158878	Increase	norm
70	Velocity (right knee)	ns	0.515847	0.116828	0.143621	Increase	norm
70	Velocity (right ankle)	ns	0.580872	0.106369	0.0923106	Decrease	norm
70	Velocity (left hip)	ns	0.262332	0.118485	0.217472	Increase	un norm
70	Velocity (left knee)	ns	0.686906	0.123806	0.111333	Decrease	norm
70	Velocity (left ankle)	ns	0.286573	0.122853	0.186098	Increase	norm
70	Velocity (left big toe)	ns	0.475335	0.133759	0.123543	Decrease	norm
70	Velocity (left small toe)	ns	0.447513	0.132728	0.12012	Decrease	norm
70	Velocity (left heel)	ns	0.922388	0.111505	0.109259	Decrease	norm
70	Velocity (right big toe)	ns	1	0.125422	0.123769	Decrease	un norm
70	Velocity (right small toe)	ns	1	0.123184	0.123172	Decrease	un norm
70	Velocity (right heel)	ns	0.916787	0.11089	0.107329	Decrease	norm
70	Acceleration (head)	ns	0.748774	0.00295085	0.0636023	Increase	un norm
70	Acceleration (neck)	ns	1	0.0214003	0.117042	Increase	un norm
70	Acceleration (right shoulder)	ns	0.549674	0.00434359	0.000915776	Decrease	un norm
70	Acceleration (right elbow)	ns	0.797648	0.0012826	0.000762552	Decrease	un norm
70	Acceleration (right wrist)	ns	0.797648	0.000952411	0.00219565	Increase	un norm
70	Acceleration (left shoulder)	ns	0.900879	0.00173069	0.00188693	Increase	norm
70	Acceleration (left elbow)	ns	0.797648	0.00166031	0.0011969	Decrease	un norm
70	Acceleration (left wrist)	ns	0.934825	0.000840542	0.000891498	Increase	norm
70	Acceleration (right hip)	ns	0.42334	0.0101241	0.0719427	Increase	un norm
70	Acceleration (right knee)	ns	0.314472	0.00714274	0.0105079	Increase	norm
70	Acceleration (right ankle)	ns	0.947856	0.0106015	0.0110175	Increase	norm
70	Acceleration (left hip)	ns	0.87278	0.00982696	0.114547	Increase	un norm
70	Acceleration (left knee)	ns	0.630954	0.00645595	0.00647846	Increase	un norm
70	Acceleration (left ankle)	ns	0.521839	0.00885897	0.0105859	Increase	un norm
70	Acceleration (left big toe)	ns	0.430314	0.00465918	0.00336147	Decrease	norm
70	Acceleration (left small toe)	ns	0.676328	0.0052498	0.00446531	Decrease	norm
70	Acceleration (left heel)	ns	0.200185	0.00765856	0.00376079	Decrease	un norm
70	Acceleration (right big toe)	ns	0.131713	0.00883064	0.00384912	Decrease	norm
70	Acceleration (right small toe)	ns	0.100088	0.00776952	0.00355255	Decrease	norm
70	Acceleration (right heel)	ns	0.923793	0.00550375	0.00519665	Decrease	norm
70	Mean Angle (neck)	ns	0.913661	146.05	145.705	Decrease	norm
70	Mean Angle (left shoulder)	ns	0.929268	88.7602	88.5979	Decrease	norm
70	Mean Angle (left elbow)	ns	0.827259	171.334	171.475	Increase	un norm
70	Mean Angle (right hip)	ns	0.361354	175.178	174.875	Decrease	norm
70	Mean Angle (right knee)	ns	0.521839	157.997	156.113	Decrease	un norm
70	Mean Angle (left hip)	ns	0.748774	175.678	175.386	Decrease	un norm
70	Mean Angle (left knee)	ns	0.200185	165.472	160.235	Decrease	un norm
70	Std Dev Angle (neck)	ns	0.87278	7.03754	7.52766	Increase	un norm
70	Std Dev Angle (left shoulder)	ns	0.827259	2.28313	2.26663	Decrease	un norm
70	Std Dev Angle (left elbow)	ns	0.968969	2.02452	2.0049	Decrease	norm
70	Std Dev Angle (right hip)	ns	0.521839	3.56058	5.97743	Increase	un norm
70	Std Dev Angle (right knee)	ns	0.87278	17.3599	23.9315	Increase	un norm
70	Std Dev Angle (left hip)	ns	0.87278	3.05768	5.07596	Increase	un norm
70	Std Dev Angle (left knee)	ns	0.149541	13.6821	22.1887	Increase	un norm
28	Arm Swing Amplitude (right wrist)	*	0.0446803	0.096428	0.128061	Increase	norm
28	Arm Swing Amplitude (left wrist)	ns	0.402059	0.101956	0.112548	Increase	norm
28	Step Length	ns	0.0879354	0.374901	0.397631	Increase	norm
28	Cadence	ns	0.153151	119.011	115.484	Decrease	un norm
28	Velocity (head)	*	0.0163092	0.312008	0.366853	Increase	un norm
28	Velocity (neck)	ns	0.149541	0.354767	0.364783	Increase	un norm
28	Velocity (right shoulder)	ns	0.441788	0.148324	0.179114	Increase	un norm
28	Velocity (right elbow)	ns	0.441788	0.162114	0.191193	Increase	un norm
28	Velocity (right wrist)	ns	0.441788	0.163135	0.190865	Increase	un norm
28	Velocity (left shoulder)	ns	0.441788	0.177642	0.197367	Increase	un norm
28	Velocity (left elbow)	ns	0.441788	0.148282	0.199996	Increase	un norm
28	Velocity (left wrist)	ns	0.441788	0.163737	0.195639	Increase	un norm
28	Velocity (right hip)	*	0.0104056	0.308231	0.365285	Increase	un norm
28	Velocity (right knee)	**	0.00394775	0.275972	0.356087	Increase	un norm
28	Velocity (right ankle)	*	0.0344255	0.284679	0.343863	Increase	norm
28	Velocity (left hip)	ns	0.149541	0.351872	0.364561	Increase	un norm
28	Velocity (left knee)	**	0.00648531	0.321935	0.383336	Increase	un norm
28	Velocity (left ankle)	**	0.00638772	0.327123	0.388951	Increase	norm
28	Velocity (left big toe)	**	0.00897354	0.332398	0.386943	Increase	norm
28	Velocity (left small toe)	*	0.0105033	0.328336	0.396462	Increase	norm
28	Velocity (left heel)	*	0.0103118	0.32668	0.390684	Increase	norm
28	Velocity (right big toe)	**	0.0046464	0.273669	0.353779	Increase	norm
28	Velocity (right small toe)	*	0.0130559	0.275105	0.350201	Increase	norm
28	Velocity (right heel)	*	0.0332065	0.273849	0.341478	Increase	norm
28	Acceleration (head)	ns	0.87278	0.0745815	0.0108862	Decrease	un norm
28	Acceleration (neck)	ns	0.87278	0.128244	0.0103933	Decrease	un norm
28	Acceleration (right shoulder)	ns	0.797648	0.00289957	0.00431067	Increase	un norm
28	Acceleration (right elbow)	ns	0.669146	0.00206409	0.00487423	Increase	un norm
28	Acceleration (right wrist)	ns	0.797648	0.00214484	0.00338869	Increase	un norm
28	Acceleration (left shoulder)	ns	0.549674	0.00289843	0.00677326	Increase	un norm
28	Acceleration (left elbow)	ns	0.797648	0.00294387	0.00385324	Increase	un norm
28	Acceleration (left wrist)	ns	0.797648	0.00336286	0.00261904	Decrease	un norm
28	Acceleration (right hip)	ns	0.87278	0.0714608	0.00933137	Decrease	un norm
28	Acceleration (right knee)	ns	0.42334	0.00736552	0.011201	Increase	un norm
28	Acceleration (right ankle)	ns	0.166116	0.00941281	0.0248698	Increase	norm
28	Acceleration (left hip)	ns	0.521839	0.111267	0.0105618	Decrease	un norm
28	Acceleration (left knee)	ns	0.0501153	0.00491624	0.0178265	Increase	norm
28	Acceleration (left ankle)	ns	0.33103	0.0218277	0.0353069	Increase	norm
28	Acceleration (left big toe)	ns	0.332085	0.0218226	0.0335574	Increase	norm
28	Acceleration (left small toe)	ns	0.297408	0.0240755	0.0412105	Increase	norm
28	Acceleration (left heel)	ns	0.296904	0.0218335	0.0388886	Increase	norm
28	Acceleration (right big toe)	ns	0.278193	0.00825286	0.0179676	Increase	norm
28	Acceleration (right small toe)	ns	0.200185	0.00827545	0.0224087	Increase	un norm
28	Acceleration (right heel)	ns	0.0696042	0.00572945	0.0276843	Increase	norm
28	Mean Angle (neck)	ns	0.0596067	138.922	142.577	Increase	norm
28	Mean Angle (left shoulder)	ns	0.0526572	86.9384	89.7387	Increase	norm
28	Mean Angle (left elbow)	ns	0.418791	164.928	165.468	Increase	norm
28	Mean Angle (right hip)	ns	1	177.176	177.413	Increase	un norm
28	Mean Angle (right knee)	ns	0.630954	164.097	167.053	Increase	un norm
28	Mean Angle (left hip)	ns	0.101311	177.062	177.791	Increase	norm
28	Mean Angle (left knee)	ns	0.109315	163.737	163.994	Increase	un norm
28	Std Dev Angle (neck)	*	0.0306885	5.86188	2.44149	Decrease	norm
28	Std Dev Angle (left shoulder)	ns	0.29623	12.8774	10.1214	Decrease	norm
28	Std Dev Angle (left elbow)	ns	0.462661	5.60553	4.45423	Decrease	norm
28	Std Dev Angle (right hip)	ns	0.630954	2.91107	1.29719	Decrease	un norm
28	Std Dev Angle (right knee)	ns	1	16.4305	10.8988	Decrease	un norm
28	Std Dev Angle (left hip)	ns	0.336668	2.88564	1.36197	Decrease	un norm
28	Std Dev Angle (left knee)	ns	0.336668	16.1339	12.8844	Decrease	un norm
20	Arm Swing Amplitude (right wrist)	*	0.0495346	0.0854095	0.130658	Increase	un norm
20	Arm Swing Amplitude (left wrist)	**	0.00741833	0.0806242	0.143816	Increase	norm
20	Step Length	**	0.00394775	0.32093	0.387815	Increase	un norm
20	Cadence	ns	0.127002	97.9372	102.797	Increase	norm
20	Velocity (head)	***	0.000225087	0.222932	0.318823	Increase	norm
20	Velocity (neck)	***	0.000470929	0.222396	0.315931	Increase	norm
20	Velocity (right shoulder)	ns	0.441788	0.110442	0.147533	Increase	un norm
20	Velocity (right elbow)	ns	0.441788	0.116211	0.150046	Increase	un norm
20	Velocity (right wrist)	ns	0.441788	0.118134	0.152515	Increase	un norm
20	Velocity (left shoulder)	ns	0.441788	0.12124	0.181487	Increase	un norm
20	Velocity (left elbow)	ns	0.441788	0.124276	0.185087	Increase	un norm
20	Velocity (left wrist)	ns	0.441788	0.12616	0.189349	Increase	un norm
20	Velocity (right hip)	***	2.58975e-05	0.227615	0.316792	Increase	norm
20	Velocity (right knee)	***	0.000271937	0.223125	0.31837	Increase	norm
20	Velocity (right ankle)	**	0.00157533	0.222962	0.318007	Increase	norm
20	Velocity (left hip)	**	0.00136432	0.223125	0.319071	Increase	norm
20	Velocity (left knee)	***	0.000594447	0.230952	0.325329	Increase	norm
20	Velocity (left ankle)	**	0.00743591	0.230127	0.308913	Increase	norm
20	Velocity (left big toe)	*	0.0163092	0.233014	0.29995	Increase	un norm
20	Velocity (left small toe)	**	0.00492538	0.231335	0.301724	Increase	norm
20	Velocity (left heel)	*	0.0127933	0.230132	0.308779	Increase	norm
20	Velocity (right big toe)	**	0.00394775	0.227792	0.326448	Increase	un norm
20	Velocity (right small toe)	**	0.00394775	0.229399	0.325309	Increase	un norm
20	Velocity (right heel)	***	0.000985954	0.221077	0.316217	Increase	norm
20	Acceleration (head)	ns	0.252617	0.00141573	0.00294627	Increase	norm
20	Acceleration (neck)	ns	0.87278	0.00159255	0.0023504	Increase	un norm
20	Acceleration (right shoulder)	ns	0.441788	0.00118435	0.0027872	Increase	un norm
20	Acceleration (right elbow)	ns	0.549674	0.000641389	0.00312753	Increase	un norm
20	Acceleration (right wrist)	ns	0.931892	0.00128129	0.00253685	Increase	un norm
20	Acceleration (left shoulder)	ns	0.931892	0.000605416	0.000712574	Increase	un norm
20	Acceleration (left elbow)	ns	0.669146	0.000832999	0.00127125	Increase	un norm
20	Acceleration (left wrist)	ns	0.797648	0.00147969	0.00168256	Increase	un norm
20	Acceleration (right hip)	ns	0.252816	0.00240741	0.00407961	Increase	norm
20	Acceleration (right knee)	ns	1	0.00303553	0.00605627	Increase	un norm
20	Acceleration (right ankle)	ns	0.200185	0.00344037	0.0129191	Increase	un norm
20	Acceleration (left hip)	ns	0.0872611	0.00144771	0.00395273	Increase	norm
20	Acceleration (left knee)	ns	0.87278	0.00348627	0.00457042	Increase	un norm
20	Acceleration (left ankle)	ns	0.694206	0.00528177	0.00664403	Increase	norm
20	Acceleration (left big toe)	ns	0.630954	0.0077634	0.00522494	Decrease	un norm
20	Acceleration (left small toe)	ns	0.748774	0.00894224	0.00477939	Decrease	un norm
20	Acceleration (left heel)	ns	0.969458	0.00627821	0.00640735	Increase	norm
20	Acceleration (right big toe)	ns	0.336668	0.00577496	0.0133017	Increase	un norm
20	Acceleration (right small toe)	ns	0.336668	0.00557563	0.0132557	Increase	un norm
20	Acceleration (right heel)	ns	0.1497	0.00279453	0.0134871	Increase	norm
20	Mean Angle (neck)	ns	0.373773	150.444	151.849	Increase	norm
20	Mean Angle (left shoulder)	***	0.00010253	84.7043	99.508	Increase	norm
20	Mean Angle (left elbow)	*	0.0495346	161.855	168.477	Increase	un norm
20	Mean Angle (right hip)	ns	0.630954	176.707	176.594	Decrease	un norm
20	Mean Angle (right knee)	***	0.000627106	172.583	168.739	Decrease	norm
20	Mean Angle (left hip)	ns	0.748774	176.149	175.997	Decrease	un norm
20	Mean Angle (left knee)	ns	0.13654	171.368	169.845	Decrease	norm
20	Std Dev Angle (neck)	ns	0.106561	1.68016	2.58641	Increase	norm
20	Std Dev Angle (left shoulder)	***	3.44598e-05	3.61142	23.2493	Increase	norm
20	Std Dev Angle (left elbow)	ns	0.157555	2.67113	3.88986	Increase	norm
20	Std Dev Angle (right hip)	**	0.00394775	0.833503	1.89669	Increase	un norm
20	Std Dev Angle (right knee)	**	0.00457842	8.21972	9.88413	Increase	norm
20	Std Dev Angle (left hip)	**	0.00337016	1.10768	1.59949	Increase	norm
20	Std Dev Angle (left knee)	ns	0.109524	8.61617	10.1739	Increase	norm
59	Arm Swing Amplitude (right wrist)	ns	0.827259	0.105181	0.115856	Increase	un norm
59	Arm Swing Amplitude (left wrist)	ns	0.284441	0.0272586	0.0678147	Increase	norm
59	Step Length	ns	0.200185	0.306135	0.25521	Decrease	un norm
59	Cadence	ns	0.929646	113.579	113.089	Decrease	norm
59	Velocity (head)	ns	0.0752773	0.261296	0.176977	Decrease	norm
59	Velocity (neck)	*	0.0485615	0.254045	0.159442	Decrease	norm
59	Velocity (right shoulder)	ns	0.441788	0.140648	0.099854	Decrease	un norm
59	Velocity (right elbow)	ns	0.441788	0.143234	0.0980495	Decrease	un norm
59	Velocity (right wrist)	ns	0.669146	0.142744	0.107066	Decrease	un norm
59	Velocity (left shoulder)	ns	0.549674	0.128791	0.0593642	Decrease	un norm
59	Velocity (left elbow)	ns	0.549674	0.129887	0.0549033	Decrease	un norm
59	Velocity (left wrist)	ns	0.549674	0.130776	0.0583278	Decrease	un norm
59	Velocity (right hip)	ns	0.0514139	0.256761	0.159051	Decrease	norm
59	Velocity (right knee)	ns	0.0556201	0.255123	0.159674	Decrease	norm
59	Velocity (right ankle)	ns	0.0545034	0.248155	0.145446	Decrease	norm
59	Velocity (left hip)	*	0.0454032	0.244539	0.149849	Decrease	norm
59	Velocity (left knee)	ns	0.0546639	0.24661	0.172323	Decrease	un norm
59	Velocity (left ankle)	*	0.0365758	0.259525	0.165009	Decrease	norm
59	Velocity (left big toe)	*	0.0300249	0.264376	0.157578	Decrease	norm
59	Velocity (left small toe)	*	0.0262041	0.266281	0.154884	Decrease	norm
59	Velocity (left heel)	*	0.0135652	0.276837	0.14062	Decrease	norm
59	Velocity (right big toe)	ns	0.16579	0.241904	0.173177	Decrease	norm
59	Velocity (right small toe)	ns	0.159059	0.242379	0.171418	Decrease	norm
59	Velocity (right heel)	ns	0.116372	0.234043	0.153538	Decrease	norm
59	Acceleration (head)	ns	0.954992	0.00536221	0.0054651	Increase	norm
59	Acceleration (neck)	ns	0.835754	0.00591329	0.00623393	Increase	norm
59	Acceleration (right shoulder)	ns	0.931892	0.00314341	0.00347275	Increase	un norm
59	Acceleration (right elbow)	ns	0.669146	0.00293322	0.0041232	Increase	un norm
59	Acceleration (right wrist)	ns	0.636804	0.00280378	0.00416606	Increase	norm
59	Acceleration (left shoulder)	ns	0.669146	0.00291492	0.00204279	Decrease	un norm
59	Acceleration (left elbow)	ns	0.894798	0.002322	0.00256733	Increase	norm
59	Acceleration (left wrist)	ns	0.669146	0.00389703	0.0018524	Decrease	un norm
59	Acceleration (right hip)	ns	0.521839	0.00468118	0.00638539	Increase	un norm
59	Acceleration (right knee)	ns	0.109315	0.0105974	0.00677388	Decrease	un norm
59	Acceleration (right ankle)	ns	0.630954	0.0084886	0.0107388	Increase	un norm
59	Acceleration (left hip)	ns	0.402354	0.0051124	0.00646501	Increase	norm
59	Acceleration (left knee)	ns	0.630954	0.0144858	0.00515317	Decrease	un norm
59	Acceleration (left ankle)	*	0.0163092	0.0169475	0.0018696	Decrease	un norm
59	Acceleration (left big toe)	ns	0.0822139	0.0152659	0.00349404	Decrease	norm
59	Acceleration (left small toe)	ns	0.0781691	0.0139484	0.00300194	Decrease	un norm
59	Acceleration (left heel)	ns	0.149541	0.0116278	0.00317083	Decrease	un norm
59	Acceleration (right big toe)	ns	0.748774	0.00540627	0.00866908	Increase	un norm
59	Acceleration (right small toe)	ns	0.87278	0.00427157	0.00897719	Increase	un norm
59	Acceleration (right heel)	ns	0.187024	0.00360171	0.0107464	Increase	norm
59	Mean Angle (neck)	**	0.00131154	133.514	142.159	Increase	norm
59	Mean Angle (left shoulder)	ns	0.248213	76.5432	72.2008	Decrease	un norm
59	Mean Angle (left elbow)	*	0.0495346	153.038	157.812	Increase	un norm
59	Mean Angle (right hip)	ns	0.630954	176.554	175.743	Decrease	un norm
59	Mean Angle (right knee)	ns	0.625359	169.47	170.228	Increase	norm
59	Mean Angle (left hip)	ns	1	175.388	175.239	Decrease	un norm
59	Mean Angle (left knee)	ns	0.0869087	170.519	171.691	Increase	norm
59	Std Dev Angle (neck)	ns	0.385081	3.70703	5.81095	Increase	norm
59	Std Dev Angle (left shoulder)	ns	1	4.52774	3.26176	Decrease	un norm
59	Std Dev Angle (left elbow)	ns	0.480552	1.25122	2.90053	Increase	norm
59	Std Dev Angle (right hip)	ns	0.429138	0.987252	1.44525	Increase	norm
59	Std Dev Angle (right knee)	ns	0.149541	9.02275	7.34643	Decrease	un norm
59	Std Dev Angle (left hip)	ns	0.939673	1.49668	1.53423	Increase	norm
59	Std Dev Angle (left knee)	ns	0.129683	7.65213	6.07679	Decrease	norm
31	Arm Swing Amplitude (right wrist)	ns	0.911539	0.107213	0.110225	Increase	norm
31	Arm Swing Amplitude (left wrist)	ns	0.27076	0.126367	0.14957	Increase	norm
31	Step Length	ns	0.42334	0.314515	0.289475	Decrease	un norm
31	Cadence	ns	0.606848	115.518	126.601	Increase	norm
31	Velocity (head)	ns	0.116581	0.260799	0.203817	Decrease	norm
31	Velocity (neck)	ns	0.09077	0.263612	0.190602	Decrease	norm
31	Velocity (right shoulder)	ns	0.549674	0.136128	0.0859386	Decrease	un norm
31	Velocity (right elbow)	ns	0.549674	0.137364	0.0866954	Decrease	un norm
31	Velocity (right wrist)	ns	0.549674	0.137743	0.0896098	Decrease	un norm
31	Velocity (left shoulder)	ns	0.797648	0.1337	0.101222	Decrease	un norm
31	Velocity (left elbow)	ns	0.797648	0.137476	0.100559	Decrease	un norm
31	Velocity (left wrist)	ns	0.797648	0.134187	0.0979104	Decrease	un norm
31	Velocity (right hip)	*	0.0465219	0.27354	0.18583	Decrease	norm
31	Velocity (right knee)	*	0.0204112	0.28487	0.180973	Decrease	norm
31	Velocity (right ankle)	*	0.0200051	0.293584	0.160729	Decrease	norm
31	Velocity (left hip)	ns	0.10832	0.271425	0.19633	Decrease	norm
31	Velocity (left knee)	ns	0.154353	0.268829	0.195538	Decrease	norm
31	Velocity (left ankle)	ns	0.136171	0.262347	0.178987	Decrease	norm
31	Velocity (left big toe)	ns	0.149541	0.272715	0.200926	Decrease	un norm
31	Velocity (left small toe)	ns	0.149541	0.272569	0.202481	Decrease	un norm
31	Velocity (left heel)	ns	0.122671	0.271079	0.189063	Decrease	norm
31	Velocity (right big toe)	*	0.0434854	0.278492	0.166965	Decrease	norm
31	Velocity (right small toe)	*	0.0379879	0.279893	0.166275	Decrease	norm
31	Velocity (right heel)	*	0.0183273	0.28655	0.153482	Decrease	norm
31	Acceleration (head)	*	0.0285645	0.00129428	0.00654948	Increase	norm
31	Acceleration (neck)	ns	0.0551483	0.00289915	0.0072641	Increase	norm
31	Acceleration (right shoulder)	ns	0.441788	0.000610791	0.00352782	Increase	un norm
31	Acceleration (right elbow)	ns	0.562213	0.00256364	0.0039181	Increase	norm
31	Acceleration (right wrist)	ns	0.441788	0.00216188	0.00370858	Increase	un norm
31	Acceleration (left shoulder)	ns	0.797648	0.00164745	0.00393363	Increase	un norm
31	Acceleration (left elbow)	ns	0.797648	0.0019125	0.00315199	Increase	un norm
31	Acceleration (left wrist)	ns	0.931892	0.00212675	0.00339262	Increase	un norm
31	Acceleration (right hip)	ns	0.327395	0.00398926	0.00665073	Increase	norm
31	Acceleration (right knee)	ns	0.686967	0.0104916	0.00856791	Decrease	norm
31	Acceleration (right ankle)	*	0.037373	0.0115134	0.00408355	Decrease	un norm
31	Acceleration (left hip)	ns	0.115301	0.00429066	0.0085198	Increase	norm
31	Acceleration (left knee)	ns	0.361305	0.00630473	0.0097416	Increase	norm
31	Acceleration (left ankle)	ns	0.630954	0.00435139	0.0101079	Increase	un norm
31	Acceleration (left big toe)	ns	0.262332	0.00565726	0.0103511	Increase	un norm
31	Acceleration (left small toe)	ns	0.375121	0.00691148	0.0101882	Increase	norm
31	Acceleration (left heel)	ns	0.178257	0.00436566	0.011743	Increase	norm
31	Acceleration (right big toe)	ns	0.0781691	0.009001	0.00335544	Decrease	un norm
31	Acceleration (right small toe)	ns	0.149541	0.00922373	0.00342436	Decrease	un norm
31	Acceleration (right heel)	ns	0.336668	0.00896894	0.00674069	Decrease	un norm
31	Mean Angle (neck)	ns	0.535906	148.027	149.513	Increase	norm
31	Mean Angle (left shoulder)	ns	0.425458	91.7446	88.3986	Decrease	norm
31	Mean Angle (left elbow)	ns	0.0600205	164.99	167.411	Increase	norm
31	Mean Angle (right hip)	ns	0.113924	177.274	176.233	Decrease	norm
31	Mean Angle (right knee)	ns	0.42334	166.57	167.687	Increase	un norm
31	Mean Angle (left hip)	ns	0.589294	175.838	175.393	Decrease	norm
31	Mean Angle (left knee)	ns	0.851074	165.996	166.273	Increase	norm
31	Std Dev Angle (neck)	*	0.0163092	1.56582	5.90092	Increase	un norm
31	Std Dev Angle (left shoulder)	*	0.0103378	6.91188	11.3815	Increase	norm
31	Std Dev Angle (left elbow)	*	0.0495346	4.58327	7.42577	Increase	un norm
31	Std Dev Angle (right hip)	ns	0.0714937	0.971681	1.43929	Increase	norm
31	Std Dev Angle (right knee)	ns	0.364804	7.39706	8.28006	Increase	norm
31	Std Dev Angle (left hip)	ns	0.401805	1.46878	1.71665	Increase	norm
31	Std Dev Angle (left knee)	ns	0.87278	7.68693	8.24268	Increase	un norm
33	Arm Swing Amplitude (right wrist)	ns	0.216419	0.0717455	0.1033	Increase	norm
33	Arm Swing Amplitude (left wrist)	**	0.00711917	0.06533	0.143714	Increase	norm
33	Step Length	ns	0.630655	0.274353	0.28449	Increase	norm
33	Cadence	ns	0.148149	88.0446	98.2683	Increase	norm
33	Velocity (head)	ns	0.676497	0.171485	0.18392	Increase	norm
33	Velocity (neck)	ns	0.721897	0.170123	0.181171	Increase	norm
33	Velocity (right shoulder)	ns	0.931892	0.100385	0.0821407	Decrease	un norm
33	Velocity (right elbow)	ns	0.931892	0.103743	0.0885677	Decrease	un norm
33	Velocity (right wrist)	ns	0.931892	0.106169	0.0911479	Decrease	un norm
33	Velocity (left shoulder)	ns	0.641369	0.0783206	0.107635	Increase	norm
33	Velocity (left elbow)	ns	0.667471	0.0803794	0.107702	Increase	norm
33	Velocity (left wrist)	ns	0.549674	0.0801679	0.106331	Increase	un norm
33	Velocity (right hip)	ns	0.568931	0.162991	0.182481	Increase	norm
33	Velocity (right knee)	ns	0.823932	0.170802	0.178496	Increase	norm
33	Velocity (right ankle)	ns	0.90428	0.167266	0.162919	Decrease	norm
33	Velocity (left hip)	ns	0.626183	0.168774	0.184424	Increase	norm
33	Velocity (left knee)	ns	0.493006	0.173247	0.197261	Increase	norm
33	Velocity (left ankle)	ns	0.356421	0.167054	0.206127	Increase	norm
33	Velocity (left big toe)	ns	0.292587	0.177311	0.223365	Increase	norm
33	Velocity (left small toe)	ns	0.236831	0.172496	0.226901	Increase	norm
33	Velocity (left heel)	ns	0.240989	0.164571	0.21634	Increase	norm
33	Velocity (right big toe)	ns	0.778815	0.168136	0.157749	Decrease	norm
33	Velocity (right small toe)	ns	0.579887	0.171663	0.151766	Decrease	norm
33	Velocity (right heel)	ns	0.656626	0.166798	0.150507	Decrease	norm
33	Acceleration (head)	**	0.00214151	0.00115153	0.0073147	Increase	norm
33	Acceleration (neck)	***	0.000149753	0.00131161	0.00839191	Increase	norm
33	Acceleration (right shoulder)	ns	0.441788	0.000668825	0.00444064	Increase	un norm
33	Acceleration (right elbow)	ns	0.931892	0.00106168	0.00237656	Increase	un norm
33	Acceleration (right wrist)	ns	0.441788	0.0006162	0.00313292	Increase	un norm
33	Acceleration (left shoulder)	ns	0.441788	0.00108733	0.00340025	Increase	un norm
33	Acceleration (left elbow)	ns	0.931892	0.00147492	0.00243379	Increase	un norm
33	Acceleration (left wrist)	ns	0.931892	0.00159456	0.00266229	Increase	un norm
33	Acceleration (right hip)	*	0.0266183	0.00299774	0.0097404	Increase	norm
33	Acceleration (right knee)	ns	0.254504	0.00478257	0.00758126	Increase	norm
33	Acceleration (right ankle)	ns	0.630954	0.00422396	0.00650112	Increase	un norm
33	Acceleration (left hip)	*	0.0276729	0.00272176	0.00807599	Increase	norm
33	Acceleration (left knee)	ns	0.127965	0.00407932	0.00806866	Increase	norm
33	Acceleration (left ankle)	ns	0.262882	0.00552756	0.0100072	Increase	norm
33	Acceleration (left big toe)	ns	0.152069	0.00560967	0.0140156	Increase	norm
33	Acceleration (left small toe)	ns	0.127405	0.00607189	0.0141061	Increase	norm
33	Acceleration (left heel)	ns	0.443377	0.00722164	0.0110415	Increase	norm
33	Acceleration (right big toe)	ns	0.42334	0.0056308	0.00486954	Decrease	un norm
33	Acceleration (right small toe)	ns	0.579804	0.00713261	0.00528633	Decrease	norm
33	Acceleration (right heel)	ns	0.24838	0.00353836	0.00742074	Increase	norm
33	Mean Angle (neck)	ns	0.423175	147.986	150.861	Increase	norm
33	Mean Angle (left shoulder)	***	0.000632471	94.9325	81.998	Decrease	norm
33	Mean Angle (left elbow)	*	0.019484	166.256	164.21	Decrease	norm
33	Mean Angle (right hip)	ns	0.109315	176.192	176.99	Increase	un norm
33	Mean Angle (right knee)	ns	0.521839	170.283	170.806	Increase	un norm
33	Mean Angle (left hip)	ns	0.87278	176.58	176.175	Decrease	un norm
33	Mean Angle (left knee)	ns	0.251636	171.832	170.7	Decrease	norm
33	Std Dev Angle (neck)	*	0.037373	1.64667	2.96871	Increase	un norm
33	Std Dev Angle (left shoulder)	ns	0.275234	10.5379	15.7315	Increase	un norm
33	Std Dev Angle (left elbow)	*	0.0495346	1.28638	5.54479	Increase	un norm
33	Std Dev Angle (right hip)	ns	0.866302	1.25837	1.20773	Decrease	norm
33	Std Dev Angle (right knee)	ns	0.638738	7.18552	7.58001	Increase	norm
33	Std Dev Angle (left hip)	ns	0.270678	1.24402	1.52393	Increase	norm
33	Std Dev Angle (left knee)	ns	0.185121	7.72549	8.90018	Increase	norm
58	Arm Swing Amplitude (right wrist)	*	0.0495346	0.0824432	0.216804	Increase	un norm
58	Arm Swing Amplitude (left wrist)	**	0.00110157	0.160982	0.253892	Increase	norm
58	Step Length	**	0.00777347	0.327728	0.386376	Increase	norm
58	Cadence	**	0.00128374	112.482	123.636	Increase	norm
58	Velocity (head)	***	1.70564e-06	0.247098	0.40703	Increase	norm
58	Velocity (neck)	***	6.21352e-06	0.245631	0.401365	Increase	norm
58	Velocity (right shoulder)	ns	0.441788	0.122078	0.197325	Increase	un norm
58	Velocity (right elbow)	ns	0.441788	0.121112	0.186935	Increase	un norm
58	Velocity (right wrist)	ns	0.441788	0.121777	0.181647	Increase	un norm
58	Velocity (left shoulder)	ns	0.441788	0.130035	0.219697	Increase	un norm
58	Velocity (left elbow)	ns	0.441788	0.131225	0.223794	Increase	un norm
58	Velocity (left wrist)	ns	0.441788	0.134745	0.229486	Increase	un norm
58	Velocity (right hip)	***	3.07658e-06	0.246653	0.399506	Increase	norm
58	Velocity (right knee)	***	1.66444e-06	0.244227	0.417836	Increase	norm
58	Velocity (right ankle)	***	5.1956e-06	0.233318	0.427845	Increase	norm
58	Velocity (left hip)	***	5.89476e-05	0.250197	0.400884	Increase	norm
58	Velocity (left knee)	**	0.00246087	0.263157	0.386741	Increase	norm
58	Velocity (left ankle)	*	0.0488785	0.267968	0.357111	Increase	norm
58	Velocity (left big toe)	ns	0.262332	0.274027	0.353409	Increase	un norm
58	Velocity (left small toe)	ns	0.200185	0.271182	0.356525	Increase	un norm
58	Velocity (left heel)	*	0.0489409	0.257522	0.35539	Increase	norm
58	Velocity (right big toe)	***	2.62342e-05	0.246517	0.419815	Increase	norm
58	Velocity (right small toe)	**	0.00394775	0.24178	0.419864	Increase	un norm
58	Velocity (right heel)	***	1.33809e-06	0.240636	0.431386	Increase	norm
58	Acceleration (head)	ns	0.892564	0.00293419	0.00310832	Increase	norm
58	Acceleration (neck)	ns	0.87278	0.00397777	0.00283559	Decrease	un norm
58	Acceleration (right shoulder)	ns	0.797648	0.00181621	0.0011892	Decrease	un norm
58	Acceleration (right elbow)	ns	0.931892	0.00104361	0.00105742	Increase	un norm
58	Acceleration (right wrist)	ns	0.931892	0.00239423	0.00223213	Decrease	un norm
58	Acceleration (left shoulder)	ns	0.549674	0.00098286	0.00199959	Increase	un norm
58	Acceleration (left elbow)	ns	0.441788	0.000511914	0.00243959	Increase	un norm
58	Acceleration (left wrist)	ns	0.169247	0.0016437	0.00661651	Increase	norm
58	Acceleration (right hip)	*	0.0437622	0.00406248	0.00142923	Decrease	norm
58	Acceleration (right knee)	ns	0.552903	0.00439117	0.0058498	Increase	norm
58	Acceleration (right ankle)	ns	0.664993	0.00790574	0.00954823	Increase	norm
58	Acceleration (left hip)	ns	0.87278	0.00444935	0.00386896	Decrease	un norm
58	Acceleration (left knee)	ns	0.149541	0.00598069	0.00382479	Decrease	un norm
58	Acceleration (left ankle)	ns	0.746402	0.00919956	0.0082617	Decrease	norm
58	Acceleration (left big toe)	ns	0.521839	0.0232741	0.00807539	Decrease	un norm
58	Acceleration (left small toe)	ns	0.521839	0.014556	0.00789885	Decrease	un norm
58	Acceleration (left heel)	ns	0.630954	0.0133518	0.0105932	Decrease	un norm
58	Acceleration (right big toe)	ns	0.630954	0.0169197	0.00825148	Decrease	un norm
58	Acceleration (right small toe)	ns	1	0.017551	0.0106052	Decrease	un norm
58	Acceleration (right heel)	ns	0.87278	0.0165495	0.0105006	Decrease	un norm
58	Mean Angle (neck)	ns	1	156.429	156.451	Increase	un norm
58	Mean Angle (left shoulder)	*	0.0218481	95.6993	110.723	Increase	norm
58	Mean Angle (left elbow)	*	0.0103169	160.463	165.18	Increase	norm
58	Mean Angle (right hip)	*	0.0424248	176.112	177.205	Increase	norm
58	Mean Angle (right knee)	ns	0.521839	165.697	164.961	Decrease	un norm
58	Mean Angle (left hip)	***	0.000418261	174.582	177.441	Increase	norm
58	Mean Angle (left knee)	ns	0.340023	169.335	168.15	Decrease	norm
58	Std Dev Angle (neck)	**	0.00638715	1.36408	3.23067	Increase	norm
58	Std Dev Angle (left shoulder)	***	0.000648398	8.54397	24.8332	Increase	norm
58	Std Dev Angle (left elbow)	ns	0.659322	8.91878	9.32257	Increase	norm
58	Std Dev Angle (right hip)	**	0.00899697	1.37966	1.68279	Increase	norm
58	Std Dev Angle (right knee)	***	8.73655e-06	9.84359	12.3613	Increase	norm
58	Std Dev Angle (left hip)	ns	0.446715	1.42969	1.55447	Increase	norm
58	Std Dev Angle (left knee)	*	0.0265778	9.26128	10.5882	Increase	norm
102	Arm Swing Amplitude (right wrist)	ns	0.0903751	0.0678709	0.11159	Increase	norm
102	Arm Swing Amplitude (left wrist)	ns	0.618151	0.112974	0.119747	Increase	norm
102	Step Length	ns	0.10043	0.221428	0.283161	Increase	norm
102	Cadence	*	0.0120182	101.282	74.9829	Decrease	norm
102	Velocity (head)	ns	0.168801	0.151505	0.111519	Decrease	norm
102	Velocity (neck)	ns	0.0929138	0.153706	0.0987466	Decrease	norm
102	Velocity (right shoulder)	ns	0.931892	0.0670218	0.0544825	Decrease	un norm
102	Velocity (right elbow)	ns	0.931892	0.0681188	0.0593129	Decrease	un norm
102	Velocity (right wrist)	ns	0.931892	0.0708704	0.0649239	Decrease	un norm
102	Velocity (left shoulder)	ns	0.441788	0.0920055	0.0436764	Decrease	un norm
102	Velocity (left elbow)	ns	0.441788	0.0955762	0.0443828	Decrease	un norm
102	Velocity (left wrist)	ns	0.441788	0.0939664	0.0507701	Decrease	un norm
102	Velocity (right hip)	ns	0.0801837	0.153449	0.0978553	Decrease	norm
102	Velocity (right knee)	ns	0.0976069	0.149262	0.0967342	Decrease	norm
102	Velocity (right ankle)	*	0.0259107	0.151611	0.0895634	Decrease	norm
102	Velocity (left hip)	ns	0.0727725	0.154742	0.0911036	Decrease	norm
102	Velocity (left knee)	ns	0.0682145	0.165924	0.0957567	Decrease	norm
102	Velocity (left ankle)	ns	0.0532962	0.165738	0.0819625	Decrease	norm
102	Velocity (left big toe)	ns	0.0781691	0.158406	0.0956867	Decrease	un norm
102	Velocity (left small toe)	ns	0.0546639	0.162834	0.0859071	Decrease	un norm
102	Velocity (left heel)	ns	0.0546639	0.170152	0.0727651	Decrease	un norm
102	Velocity (right big toe)	ns	0.239709	0.147269	0.110525	Decrease	norm
102	Velocity (right small toe)	ns	0.309957	0.147275	0.117532	Decrease	norm
102	Velocity (right heel)	*	0.0358822	0.149964	0.0996928	Decrease	norm
102	Acceleration (head)	ns	0.742455	0.00188048	0.00221417	Increase	norm
102	Acceleration (neck)	ns	0.42334	0.00188246	0.0027136	Increase	un norm
102	Acceleration (right shoulder)	ns	0.723497	0.00115517	0.0014811	Increase	norm
102	Acceleration (right elbow)	ns	0.931892	0.00117674	0.00101525	Decrease	un norm
102	Acceleration (right wrist)	ns	0.519063	0.00155695	0.000966461	Decrease	norm
102	Acceleration (left shoulder)	ns	0.669146	0.00079531	0.00162962	Increase	un norm
102	Acceleration (left elbow)	ns	0.931892	0.00149231	0.00162338	Increase	un norm
102	Acceleration (left wrist)	ns	0.441788	0.000176601	0.00222642	Increase	un norm
102	Acceleration (right hip)	ns	0.57326	0.00287641	0.00372439	Increase	norm
102	Acceleration (right knee)	*	0.0200415	0.00149939	0.00568062	Increase	norm
102	Acceleration (right ankle)	ns	0.521839	0.00179398	0.00374232	Increase	un norm
102	Acceleration (left hip)	ns	0.734399	0.0023959	0.00289646	Increase	norm
102	Acceleration (left knee)	ns	0.601953	0.00253387	0.00193438	Decrease	norm
102	Acceleration (left ankle)	ns	0.748774	0.0108637	0.00407281	Decrease	un norm
102	Acceleration (left big toe)	ns	0.748774	0.0111186	0.00451373	Decrease	un norm
102	Acceleration (left small toe)	ns	1	0.0131362	0.00386453	Decrease	un norm
102	Acceleration (left heel)	ns	0.630954	0.01422	0.00367856	Decrease	un norm
102	Acceleration (right big toe)	ns	0.521839	0.00266767	0.00406189	Increase	un norm
102	Acceleration (right small toe)	ns	0.748774	0.00319606	0.00206489	Decrease	un norm
102	Acceleration (right heel)	ns	0.42334	0.00276545	0.00422495	Increase	un norm
102	Mean Angle (neck)	ns	0.478988	139.944	136.289	Decrease	norm
102	Mean Angle (left shoulder)	**	0.00565911	114.945	81.3961	Decrease	norm
102	Mean Angle (left elbow)	*	0.0495346	163.334	167.704	Increase	un norm
102	Mean Angle (right hip)	**	0.00242035	178.08	175.484	Decrease	norm
102	Mean Angle (right knee)	***	0.000113176	169.091	172.846	Increase	norm
102	Mean Angle (left hip)	ns	0.670489	176.166	175.586	Decrease	norm
102	Mean Angle (left knee)	ns	0.10989	170.905	173.972	Increase	norm
102	Std Dev Angle (neck)	***	1.27732e-05	1.53218	12.7671	Increase	norm
102	Std Dev Angle (left shoulder)	***	0.000875367	26.3738	6.76813	Decrease	norm
102	Std Dev Angle (left elbow)	ns	0.317813	2.34244	3.46878	Increase	norm
102	Std Dev Angle (right hip)	ns	0.109315	0.982513	1.61906	Increase	un norm
102	Std Dev Angle (right knee)	ns	0.311161	8.73612	7.83118	Decrease	norm
102	Std Dev Angle (left hip)	ns	0.0850859	1.09562	1.69073	Increase	norm
102	Std Dev Angle (left knee)	ns	0.943429	6.96603	6.8679	Decrease	norm

## Sheet: Table1
Subject	Sex	Age	Height	UPDRS score (on medication)	Medicine （Medication Response Test）
2	Male	44	173	1	Madopar＋Sifrol
4	Female	67	150
5	Female	68	164
6	Female	63	158
7	Female	67	155
8	Female	67	161
9	Male	65	178	1	Madopar
10	Female	56	161
11	Male	66	172
12	Female	70	160
14	Female	83	150
17	Female	78	160
19	Female	48	156
20	Female	70	167	1	Madopar
21	Male	59	176
22	Female	68	165
23	Male	67	180	1	Madopar+Benzhexol
24	Male	67	171
25	Male	69	178
26	Male	63	160
27	Male	48	172
28	Female	56	170	1	Madopar
29	Female	67	156
30	Female	65	155
31	Female	54	155	2	Madopar
32	Male	56	170
33	Female	65	150	2	Madopar
34	Male	52	180
36	Male	62	170	1	Madopar+Benzhexol
37	Male	54	167
38	Male	69	172
39	Female	71	151
40	Male	64	178
41	Female	61	162
42	Male	58	170
43	Male	53	173
44	Male	49	180	0	Madopar
45	Male	63	177
46	Female	64	163
47	Male	61	170	1	Madopar
48	Male	70	170
49	Female	64	153
50	Male	38	183
52	Female	62	162
53	Male	64	178
54	Female	48	156
55	Female	64	150	0	Madopar
56	Male	56	180
57	Male	75	170
58	Female	63	155	1	Madopar
59	Male	62	178	2	Madopar
60	Male	44	168
61	Male	58	168	1	Madopar
62	Male	69	171	1	Madopar
63	Female	57	150
64	Female	59	152
67	Female	70	165
68	Male	68	168
69	Female	65	165
70	Male	69	164	2	Madopar
71	Male	61	178
74	Male	54	168
75	Female	58	168
76	Male	52	179
77	Female	56	164
78	Female	65	163	1	Madopar
79	Male	65	168
80	Male	74	172
81	Male	76	165
82	Male	66	160
83	Female	63	154
84	Male	65	175
85	Female	71	168
86	Male	65	169
87	Male	65	160
89	Male	58	170
91	Male	72	165	1	Madopar
92	Male	72	171
93	Female	63	163
94	Male	67	175
95	Male	65	180
97	Female	72	155
98	Male	82	177
99	Female	63	160
100	Male	74	170
102	Male	63	178	1	Madopar
104	Male	70	176
HY01	Male	65	169
HY015	Female	56	162
HY016	Female	65	157
HY017	Male	65	167
HY019	Female	62	160
HY020	Female	65	158
HY021	Male	61	171
HY022	Female	58	163
HY023	Male	54	168
HY024	Female	60	167
HY027	Female	57	160
HY028	Female	71	159
HY029	Male	62	178
HY030	Male	65	175
HY031	Female	61	165
HY032	Female	68	157
HY033	Female	62	153
HY034	Female	67	153
HY035	Male	57	167
HY036	Male	60	177
HY037	Female	64	160
HY038	Male	66	173
HY039	Male	65	167
HY04	Male	60	167
HY040	Female	65	163
HY041	Female	64	158
HY042	Male	68	170
HY06	Female	60	163
HY07	Female	58	170
HY08	Male	56	177
HY09	Female	53	160
